# Supplementary material for: Thiocyanation of BODIPY dyes and their conversion to thioalkylated derivatives
Source: Royal Society of Chemistry journal article supplement (doi:10.1039/c5ob00499c), 2015-01-01

## **Thiocyanation of BODIPY dyes and their conversion to thioalkylated derivatives**

Lucas C. D. Rezende<sup>†‡</sup>, Shaiani M.G. Melo<sup>†</sup>, Stijn Boodts<sup>‡</sup>, Bram Verbelen<sup>‡</sup>,  
Wim Dehaen<sup>‡</sup>, Flavio S. Emery<sup>†\*</sup>

### Contents

|                                       |    |
|---------------------------------------|----|
| Photophysical properties .....        | 2  |
| Absorption and emission spectra ..... | 4  |
| NMR spectra .....                     | 11 |

## Photophysical properties

**Table S1 Photophysical properties of the synthesized compounds**

| Comp./<br>Solv | $\lambda$ (nm) |     | Stokes<br>Shift<br>( $\text{cm}^{-1}$ ) | FWHM ( $\text{cm}^{-1}$ ) |      | QY    |
|----------------|----------------|-----|-----------------------------------------|---------------------------|------|-------|
|                | abs            | em  |                                         | abs                       | em   |       |
| 10             |                |     |                                         |                           |      |       |
| MeOH           | 476            | 551 | 2860                                    | 3326                      | 2228 | 0.02  |
| MeCN           | 471            | 555 | 3212                                    | 3280                      | 2382 | 0.005 |
| THF            | 488            | 555 | 2474                                    | 3167                      | 2143 | 0.09  |
| Tol            | 507            | 561 | 1899                                    | 2818                      | 2115 | 0.27  |
| 11             |                |     |                                         |                           |      |       |
| MeOH           | 495            | 509 | 556                                     | 1220                      | 1463 | 0.87  |
| MeCN           | 495            | 508 | 517                                     | 1253                      | 1482 | 0.90  |
| THF            | 499            | 515 | 623                                     | 1252                      | 1478 | 0.98  |
| Tol            | 506            | 525 | 715                                     | 1009                      | 1423 | 0.94  |
| 12             |                |     |                                         |                           |      |       |
| MeOH           | 493            | 507 | 560                                     | 1539                      | 1312 | 0.96  |
| MeCN           | 492            | 507 | 601                                     | 1555                      | 1317 | 0.94  |
| THF            | 497            | 513 | 628                                     | 1326                      | 1309 | 0.99  |
| Tol            | 505            | 518 | 497                                     | 1133                      | 1277 | 0.91  |
| 13             |                |     |                                         |                           |      |       |
| MeOH           | 485            | 505 | 817                                     | 1270                      | 1619 | 0.93  |
| MeCN           | 484            | 503 | 780                                     | 1339                      | 1706 | 0.98  |
| THF            | 489            | 510 | 842                                     | 1198                      | 1683 | 0.93  |
| Tol            | 495            | 516 | 822                                     | 1081                      | 1615 | 0.99  |
| 14             |                |     |                                         |                           |      |       |
| MeOH           | 490            | 508 | 723                                     | 1231                      | 1253 | 0.04  |
| MeCN           | 490            | 509 | 762                                     | 1326                      | 1184 | 0.04  |
| THF            | 493            | 512 | 753                                     | 1215                      | 1214 | 0.06  |
| Tol            | 498            | 512 | 549                                     | 865                       | 1182 | 0.27  |
| 15             |                |     |                                         |                           |      |       |
| MeOH           | 502            | 520 | 690                                     | 1139                      | 1277 | 0.06  |
| MeCN           | 502            | 518 | 615                                     | 1238                      | 1224 | 0.06  |
| THF            | 506            | 521 | 569                                     | 1055                      | 1206 | 0.07  |
| Tol            | 511            | 530 | 702                                     | 945                       | 1210 | 0.01  |
| 16             |                |     |                                         |                           |      |       |
| MeOH           | 494            | 510 | 635                                     | 1171                      | 1284 | 0.06  |
| MeCN           | 494            | 513 | 750                                     | 1140                      | 1553 | 0.01  |
| THF            | 498            | 519 | 812                                     | 1109                      | 1562 | 0.37  |
| Tol            | 503            | 524 | 797                                     | 1006                      | 1531 | 0.46  |
| 17             |                |     |                                         |                           |      |       |
| MeOH           | 496            | 513 | 668                                     | 1227                      | 1333 | 0.20  |
| MeCN           | 494            | 511 | 673                                     | 1230                      | 1275 | 0.10  |
| THF            | 498            | 515 | 663                                     | 1021                      | 1274 | 0.05  |
| Tol            | 503            | 520 | 650                                     | 975                       | 1207 | 0.06  |
| 18             |                |     |                                         |                           |      |       |

|      |     |     |      |      |      |       |
|------|-----|-----|------|------|------|-------|
| MeOH | 459 | 562 | 3993 | 3591 | 2278 | 0.004 |
| MeCN | 451 | 567 | 4536 | 3645 | 2571 | 0.002 |
| THF  | 467 | 569 | 3839 | 3624 | 2109 | 0.01  |
| Tol  | 483 | 561 | 1899 | 3481 | 1988 | 0.09  |
| 19   |     |     |      |      |      |       |
| MeOH | 490 | 507 | 684  | 1174 | 1841 | 0.62  |
| MeCN | 490 | 507 | 684  | 1532 | 2100 | 0.46  |
| THF  | 494 | 513 | 750  | 1214 | 1848 | 0.71  |
| Tol  | 501 | 518 | 655  | 1046 | 1641 | 0.97  |
| 20   |     |     |      |      |      |       |
| MeOH | 499 | 570 | 2496 | 1002 | 4032 | 0.05  |
| MeCN | 498 | 581 | 2869 | 1074 | 4073 | 0.05  |
| THF  | 502 | 568 | 2315 | 1022 | 3387 | 0.11  |
| Tol  | 507 | 561 | 1899 | 956  | 3065 | 0.23  |
| 21   |     |     |      |      |      |       |
| MeOH | 499 | 547 | 1759 | 1029 | 1759 | 0.09  |
| MeCN | 498 | 549 | 1865 | 106  | 1865 | 0.08  |
| THF  | 502 | 556 | 1934 | 984  | 1935 | 0.21  |
| Tol  | 507 | 544 | 1342 | 926  | 1342 | 0.38  |
| 22   |     |     |      |      |      |       |
| MeOH | 500 | 538 | 1413 | 1023 | 1413 | 0.1   |
| MeCN | 499 | 556 | 2054 | 1055 | 2054 | 0.09  |
| THF  | 503 | 540 | 1362 | 995  | 1362 | 0.19  |
| Tol  | 508 | 542 | 1235 | 940  | 1235 | 0.37  |
| 23   |     |     |      |      |      |       |
| MeOH | 509 | 583 | 2494 | 1179 | 3047 | 0.04  |
| MeCN | 507 | 591 | 2803 | 1227 | 2930 | 0.03  |
| THF  | 512 | 580 | 2290 | 1167 | 2677 | 0.10  |
| Tol  | 517 | 576 | 1981 | 1089 | 2519 | 0.22  |

---

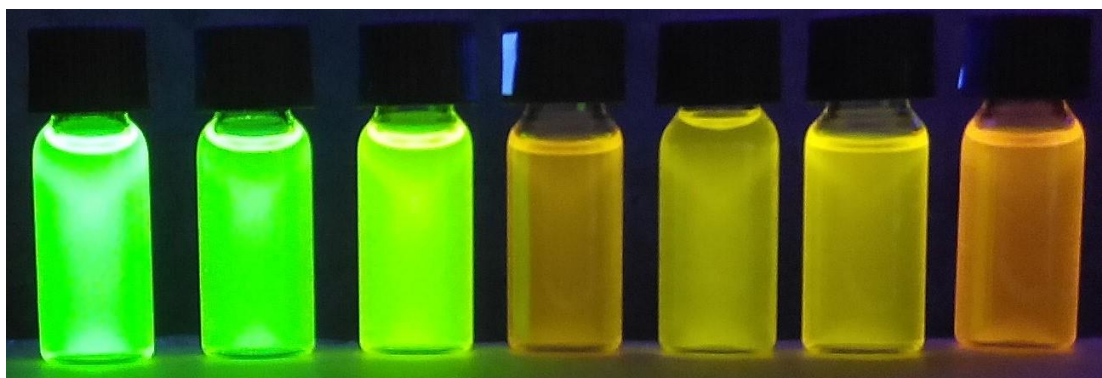

Figure S1. From left to right: Fluorescence emission observed under UV light (368 nm) of compounds **3**, **13**, **19**, **20**, **21**, **22**, **23**.



Absorption and emission of **12**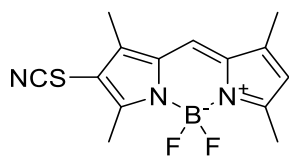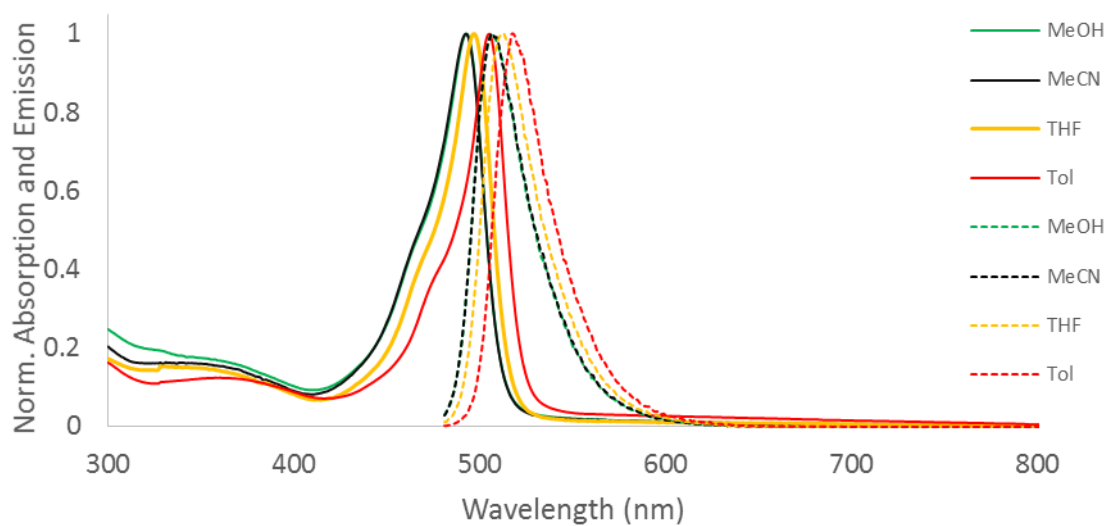Absorption and emission of **13**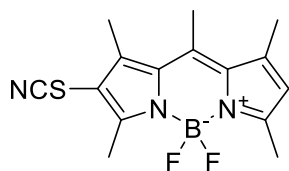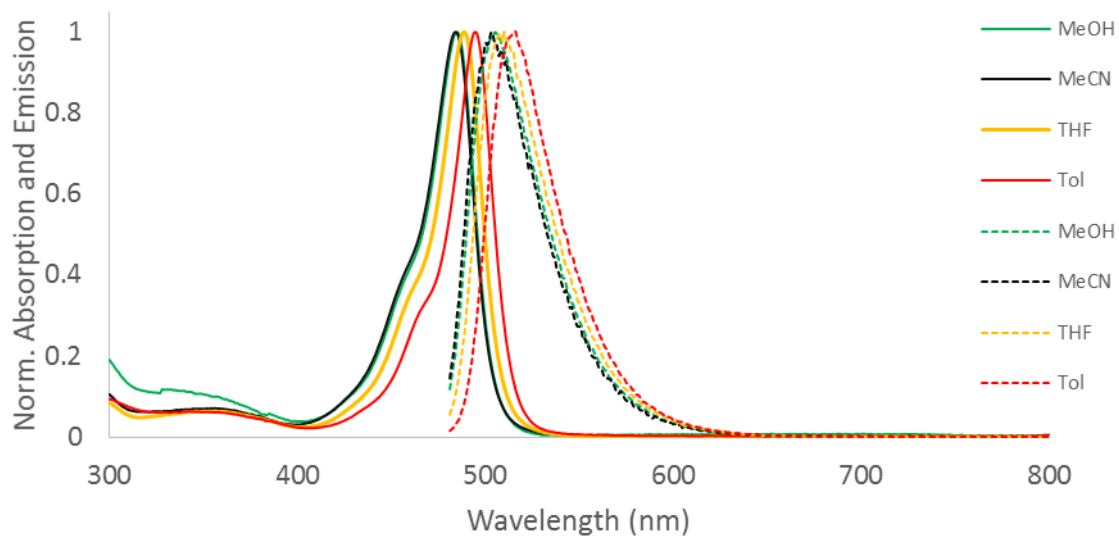

Absorption and emission of **14**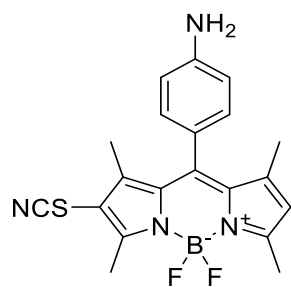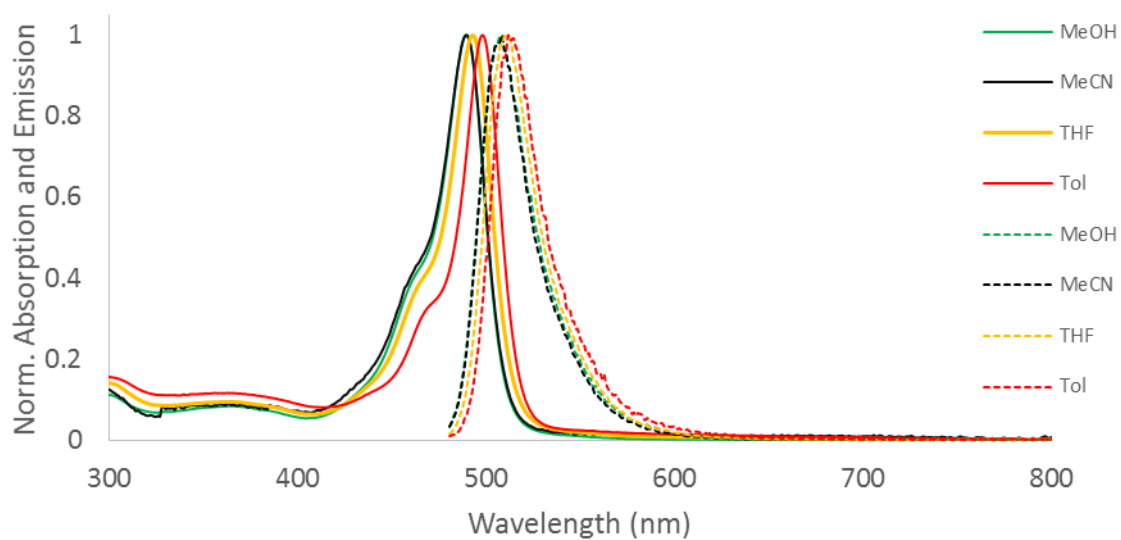Absorption and emission of **15**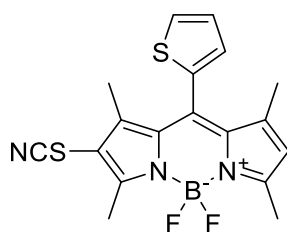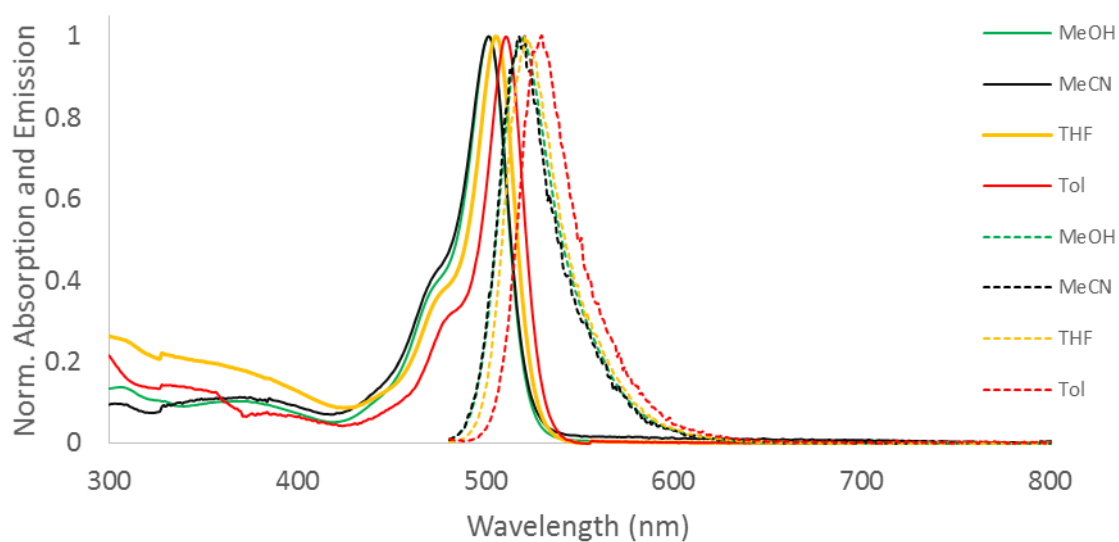

Absorption and emission of **16**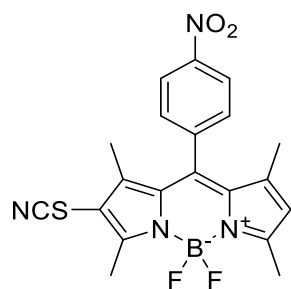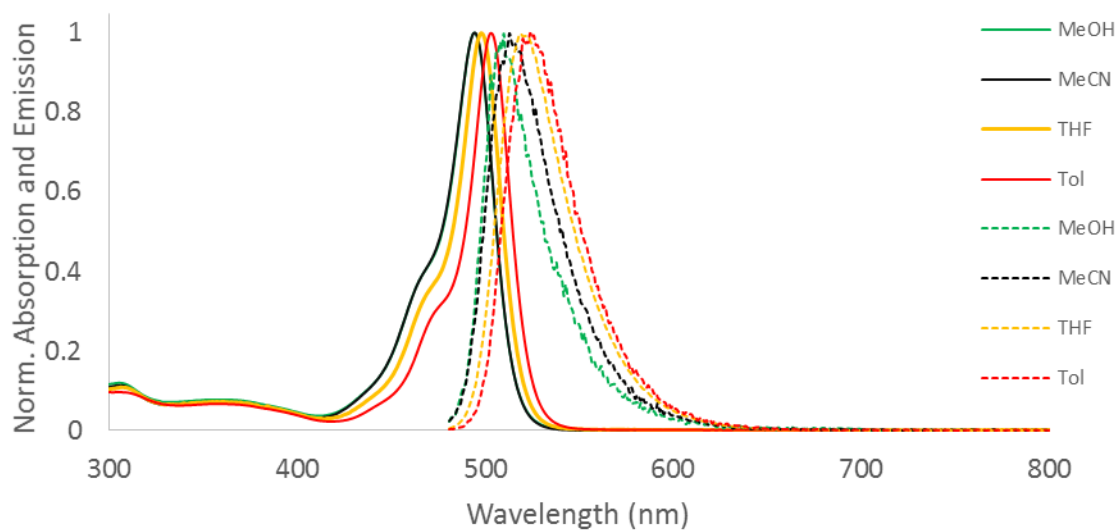Absorption and emission of **17**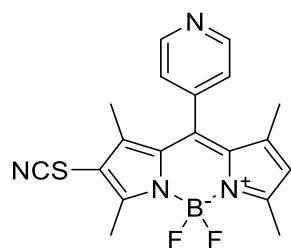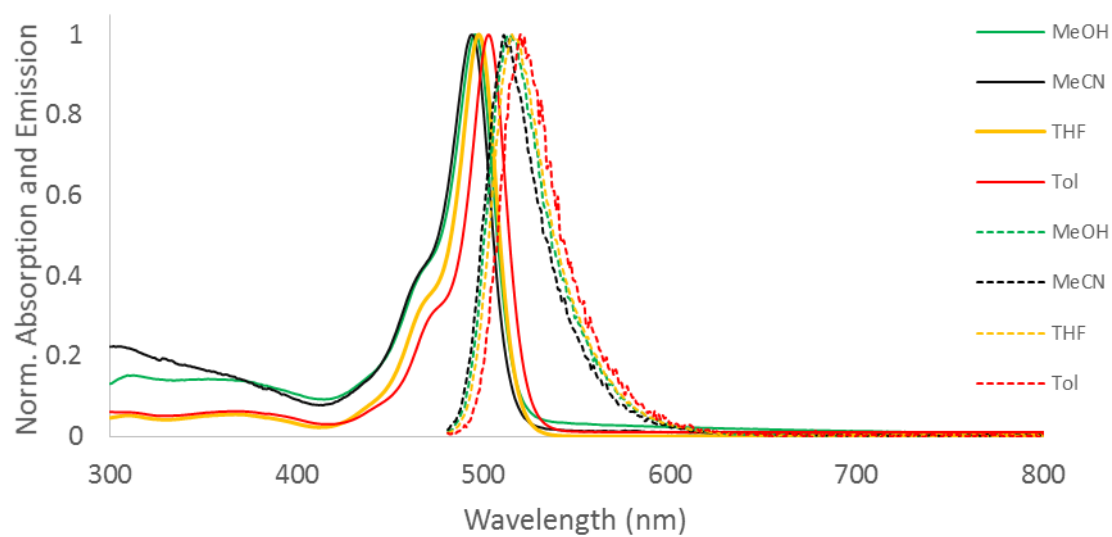

Absorption and emission of **18**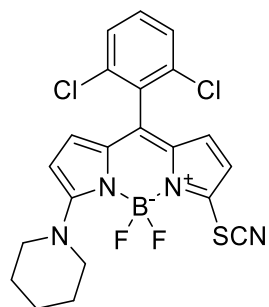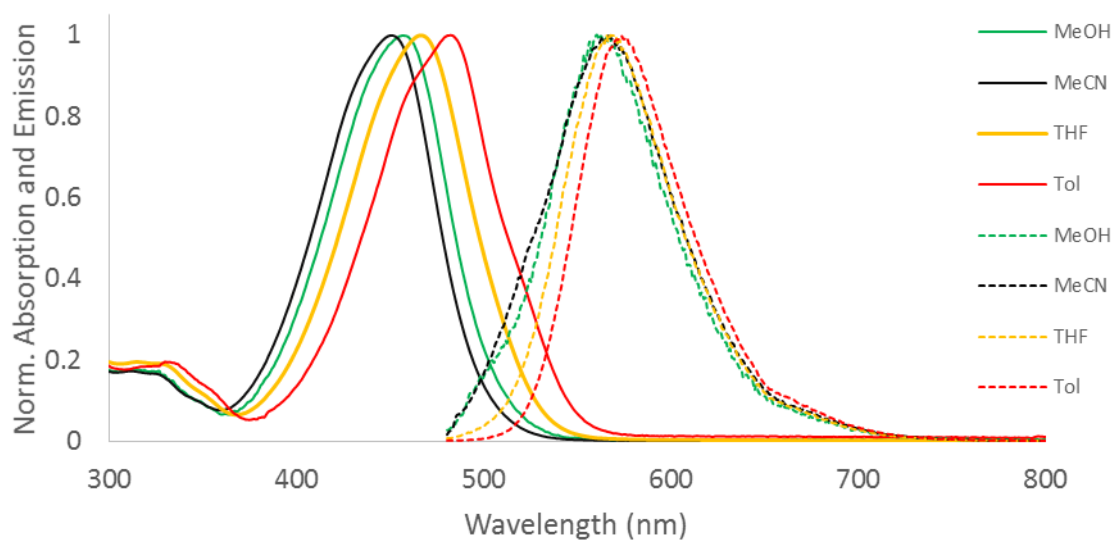Absorption and emission of **19**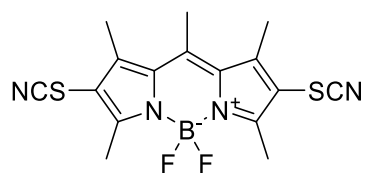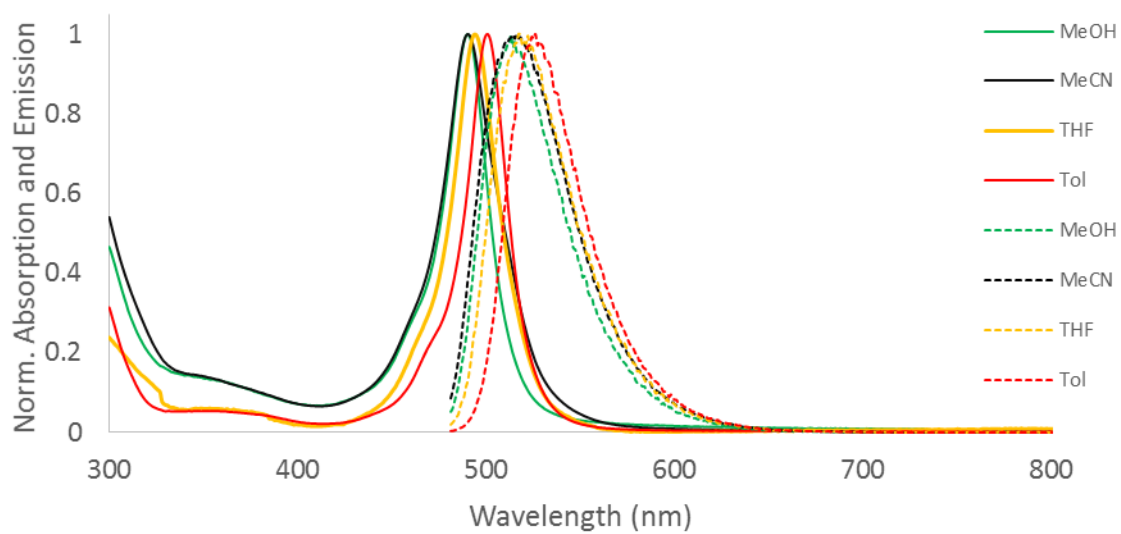



Absorption and emission of **20**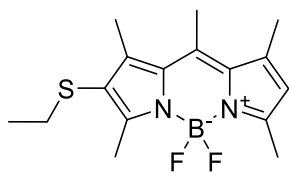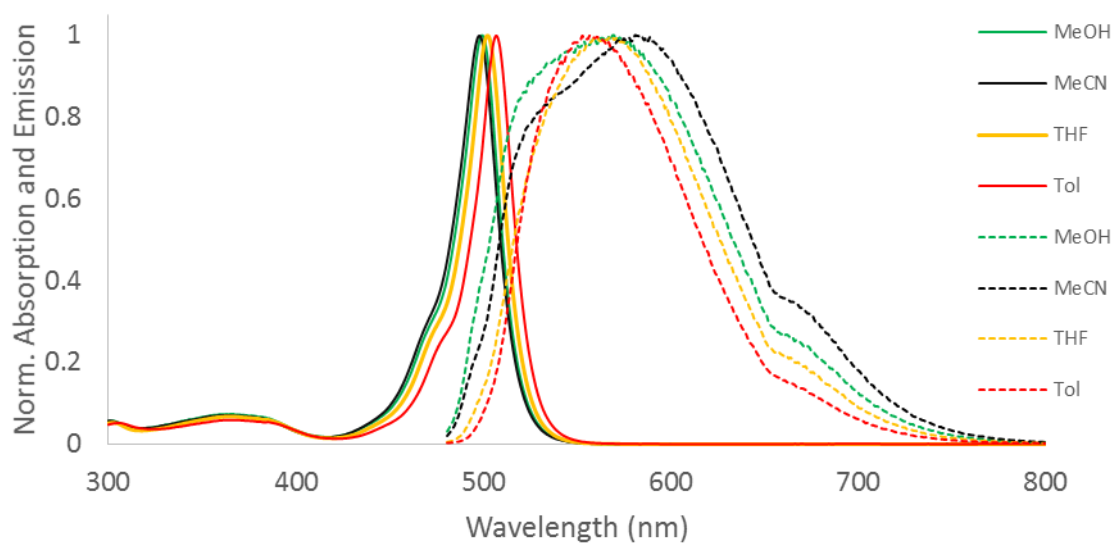Absorption and emission of **21**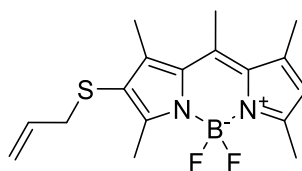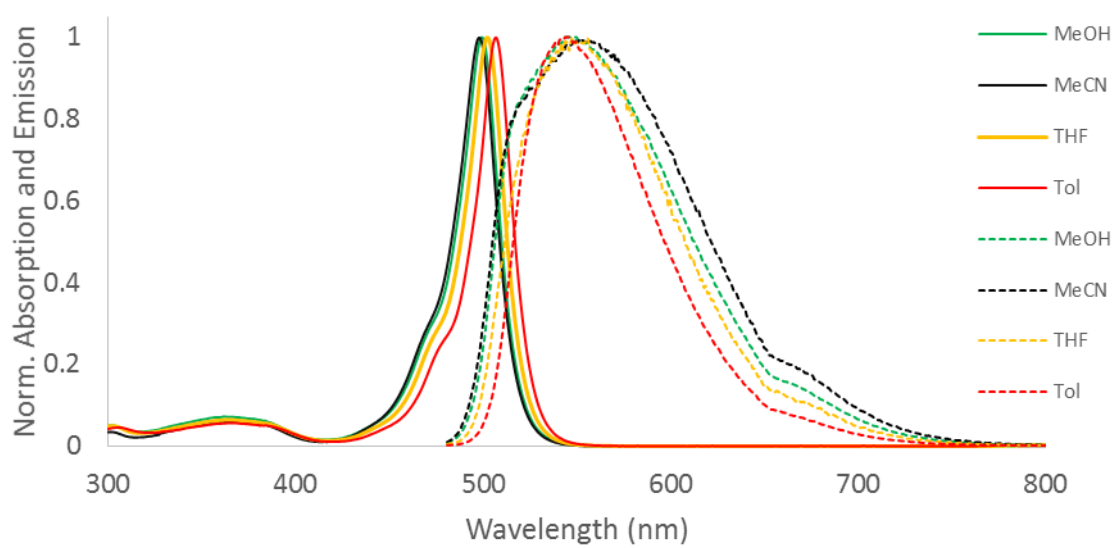

Absorption and emission of **22**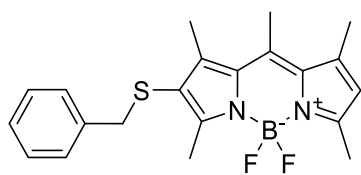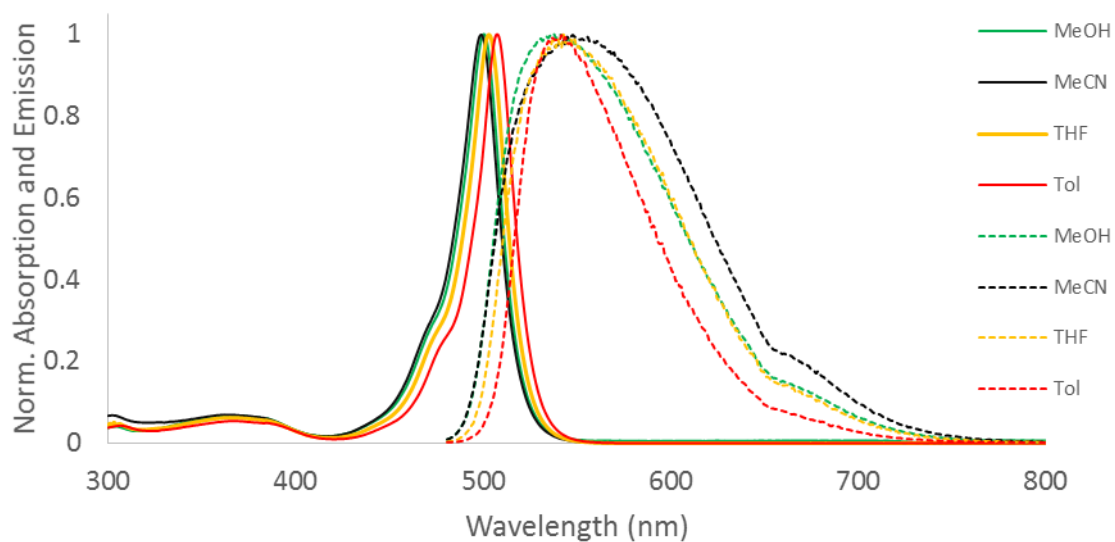Absorption and emission of **23**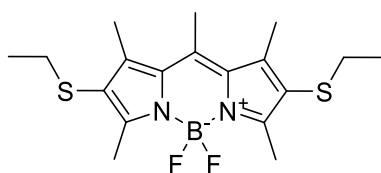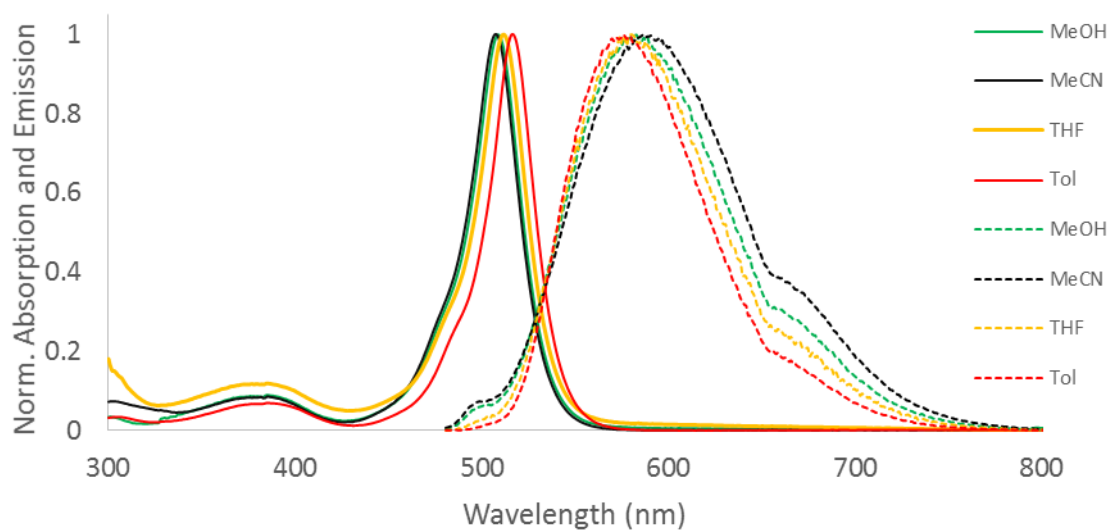

**NMR spectra**

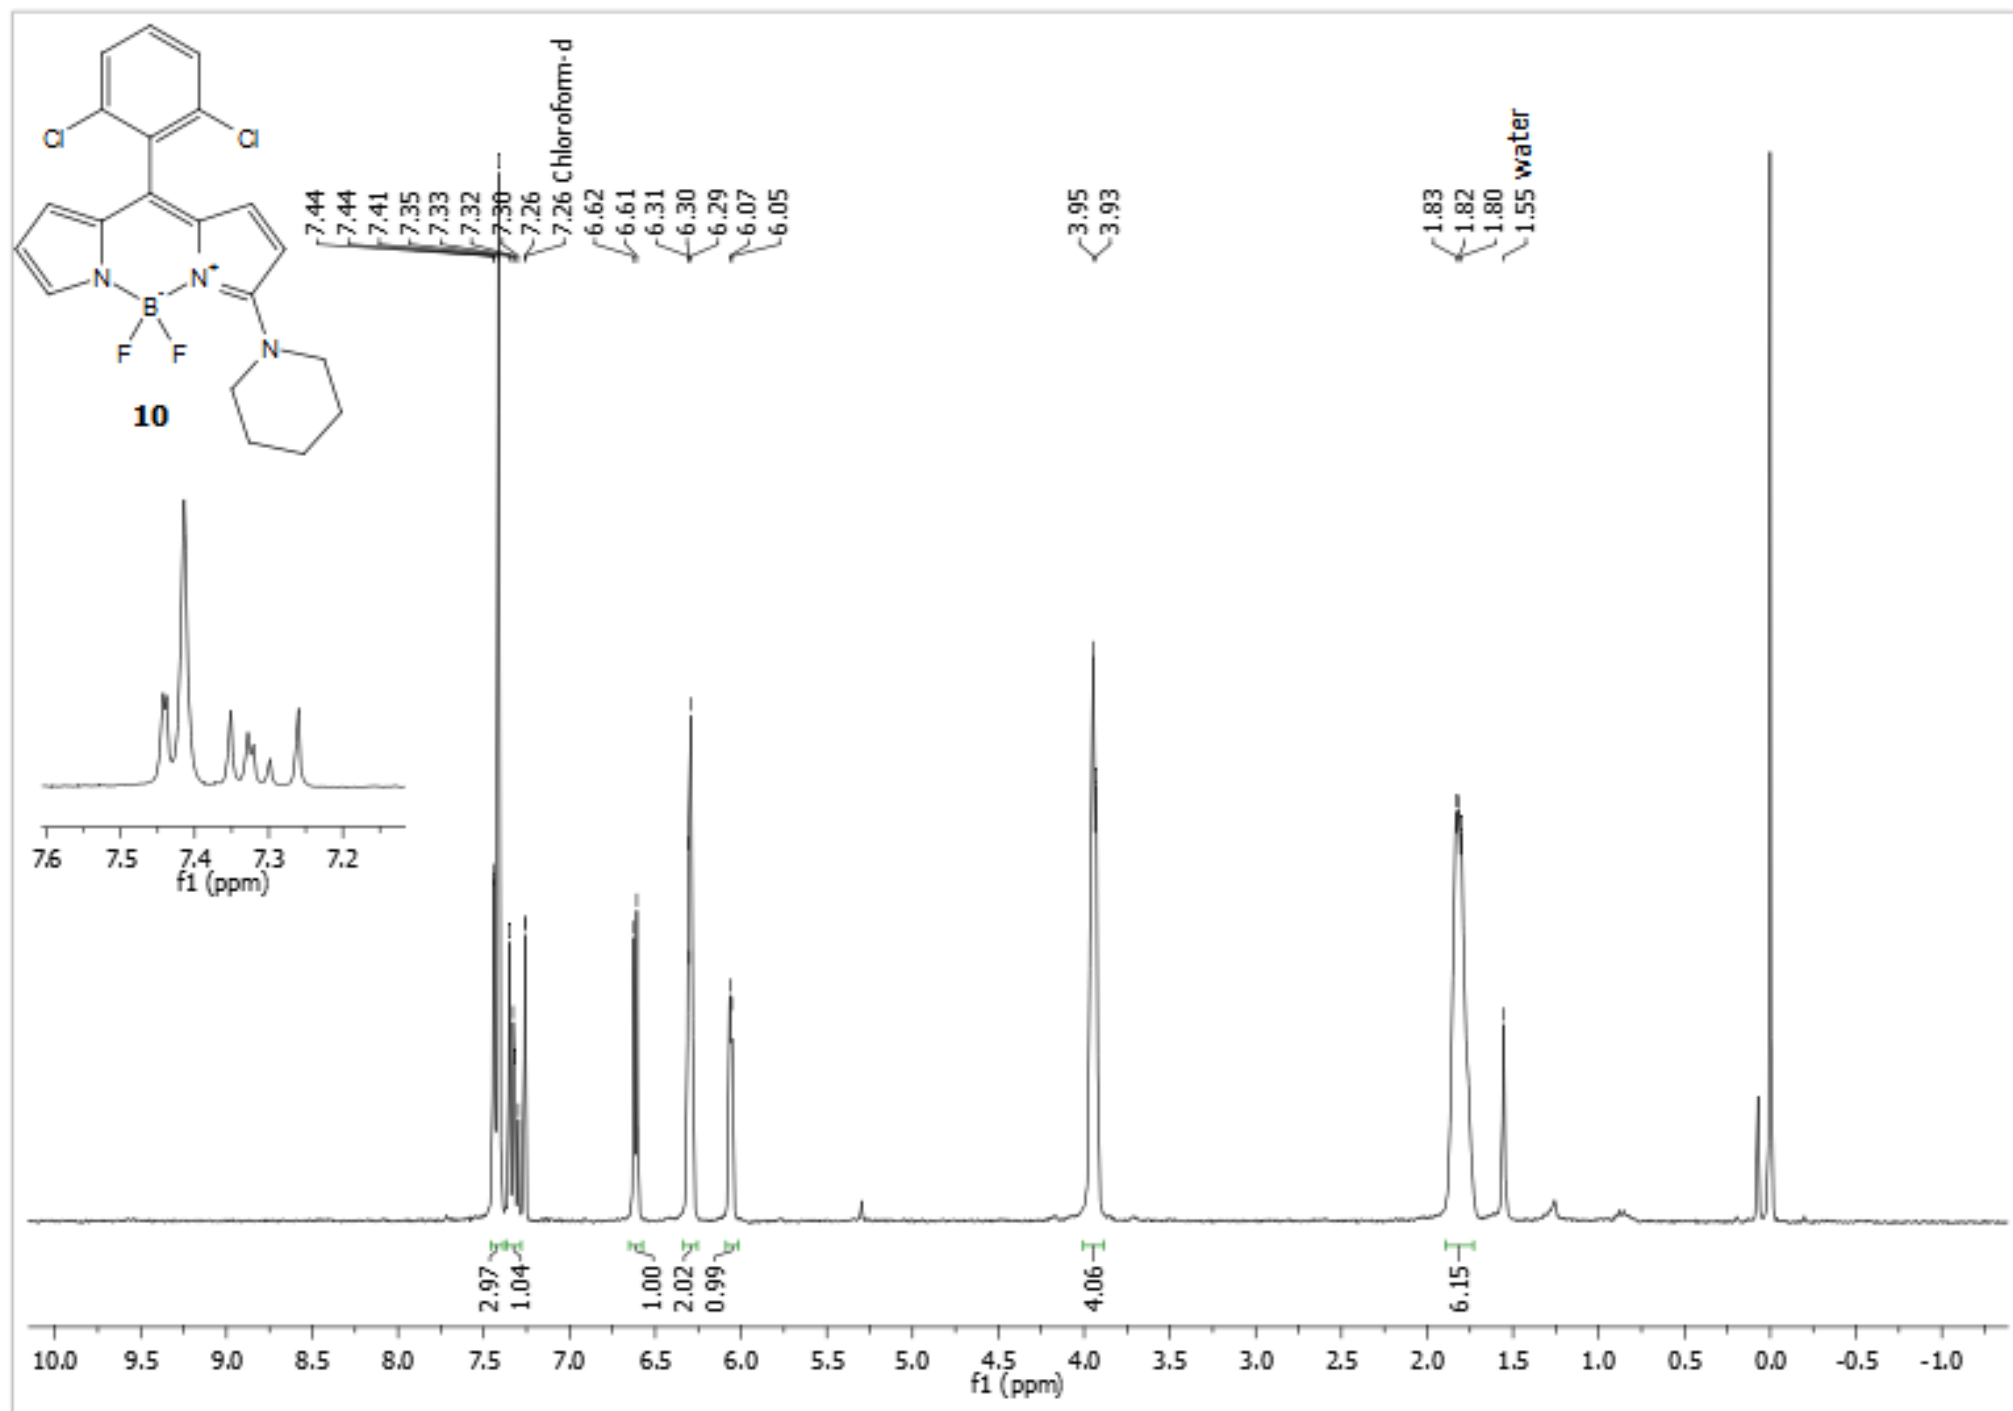

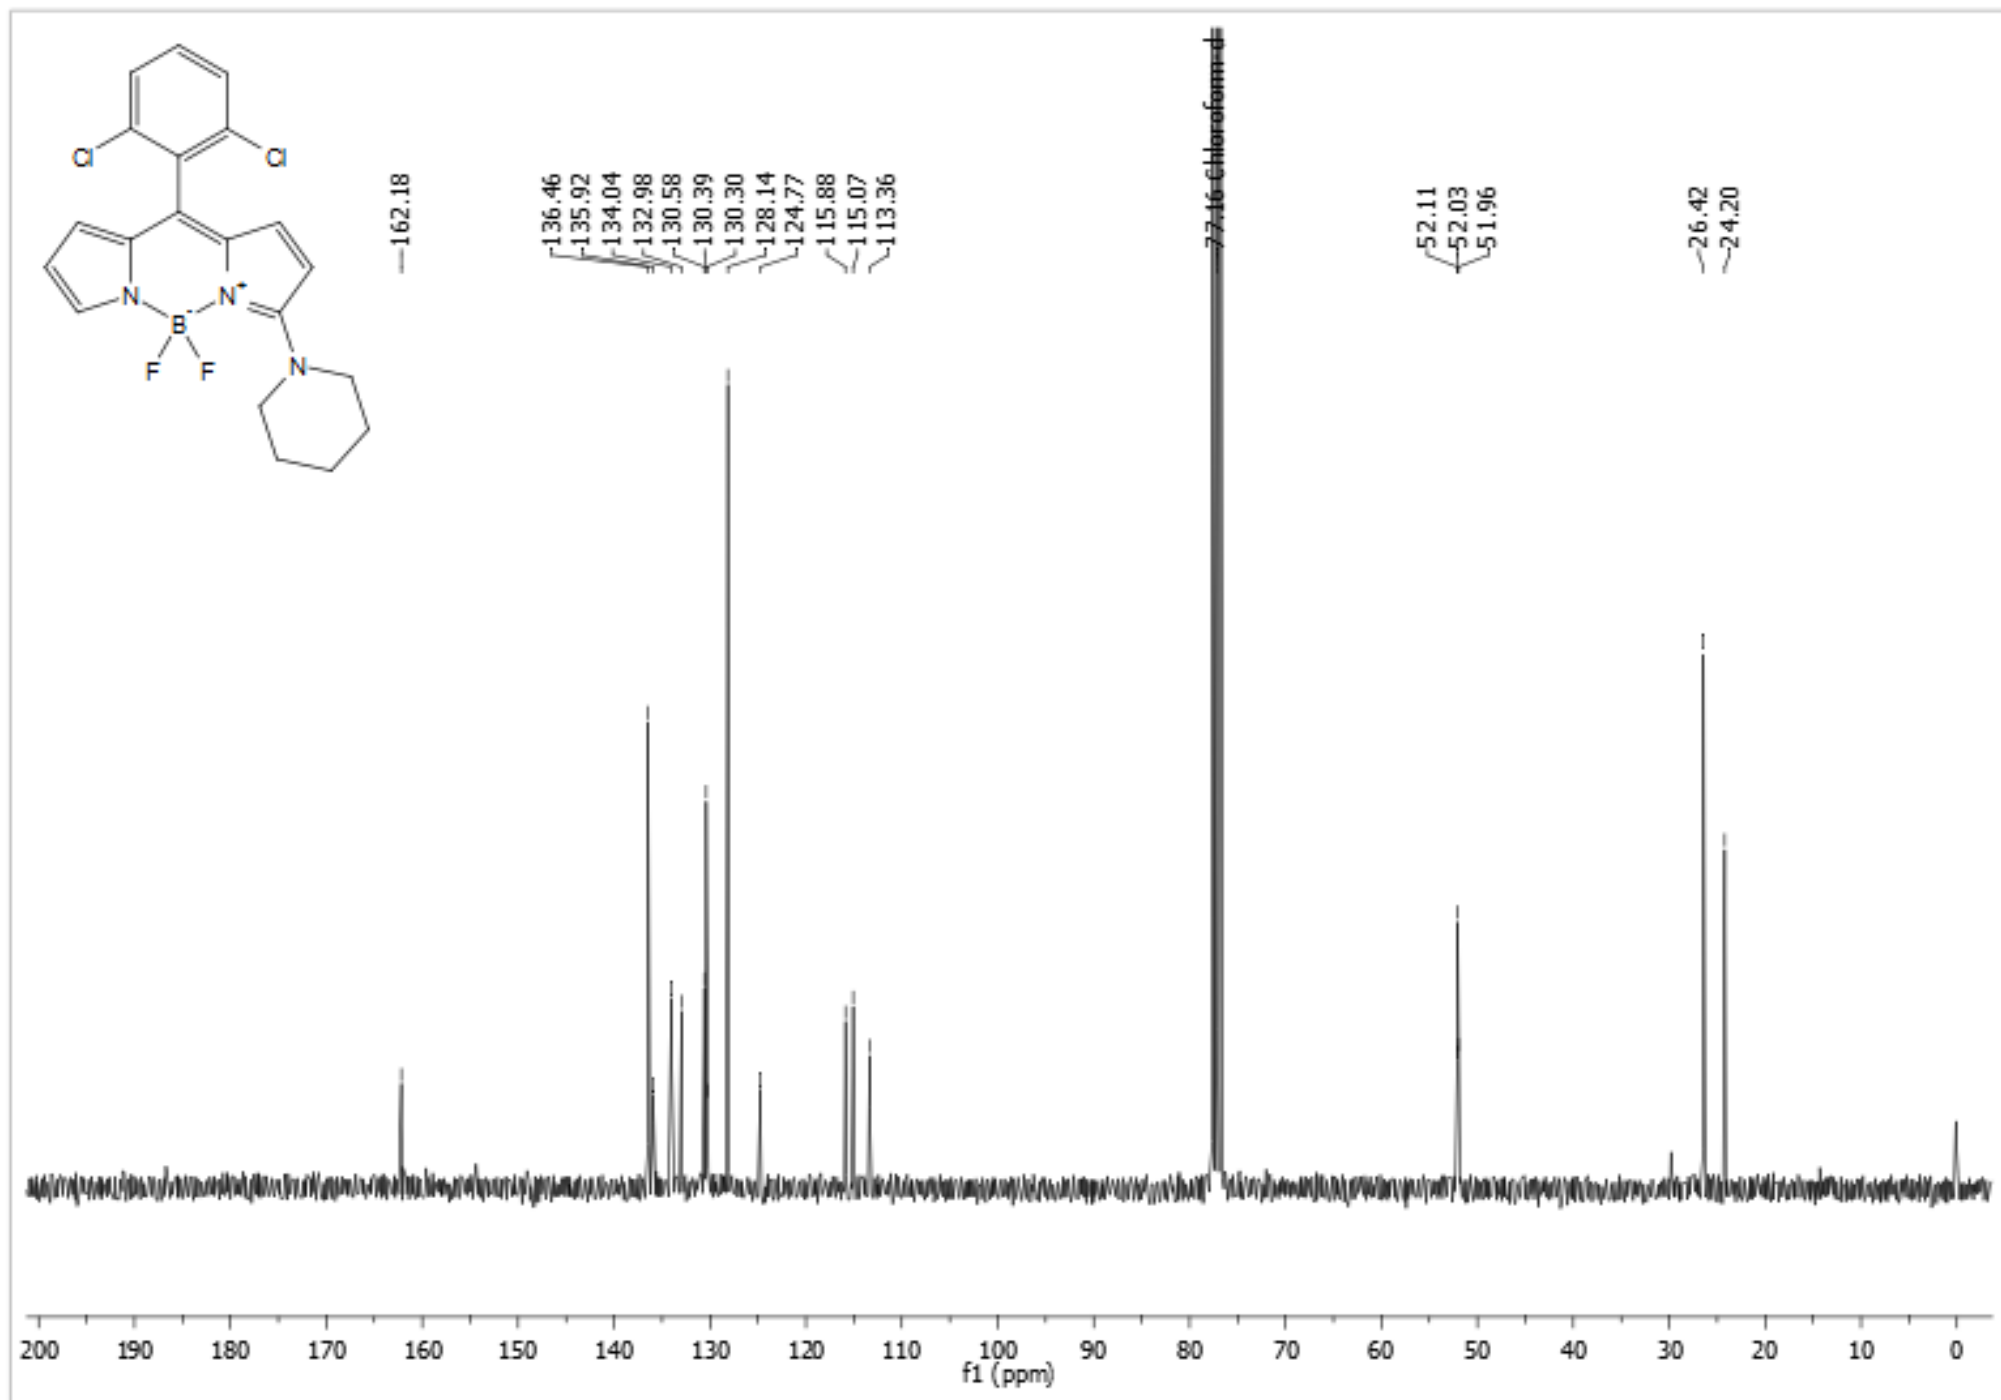

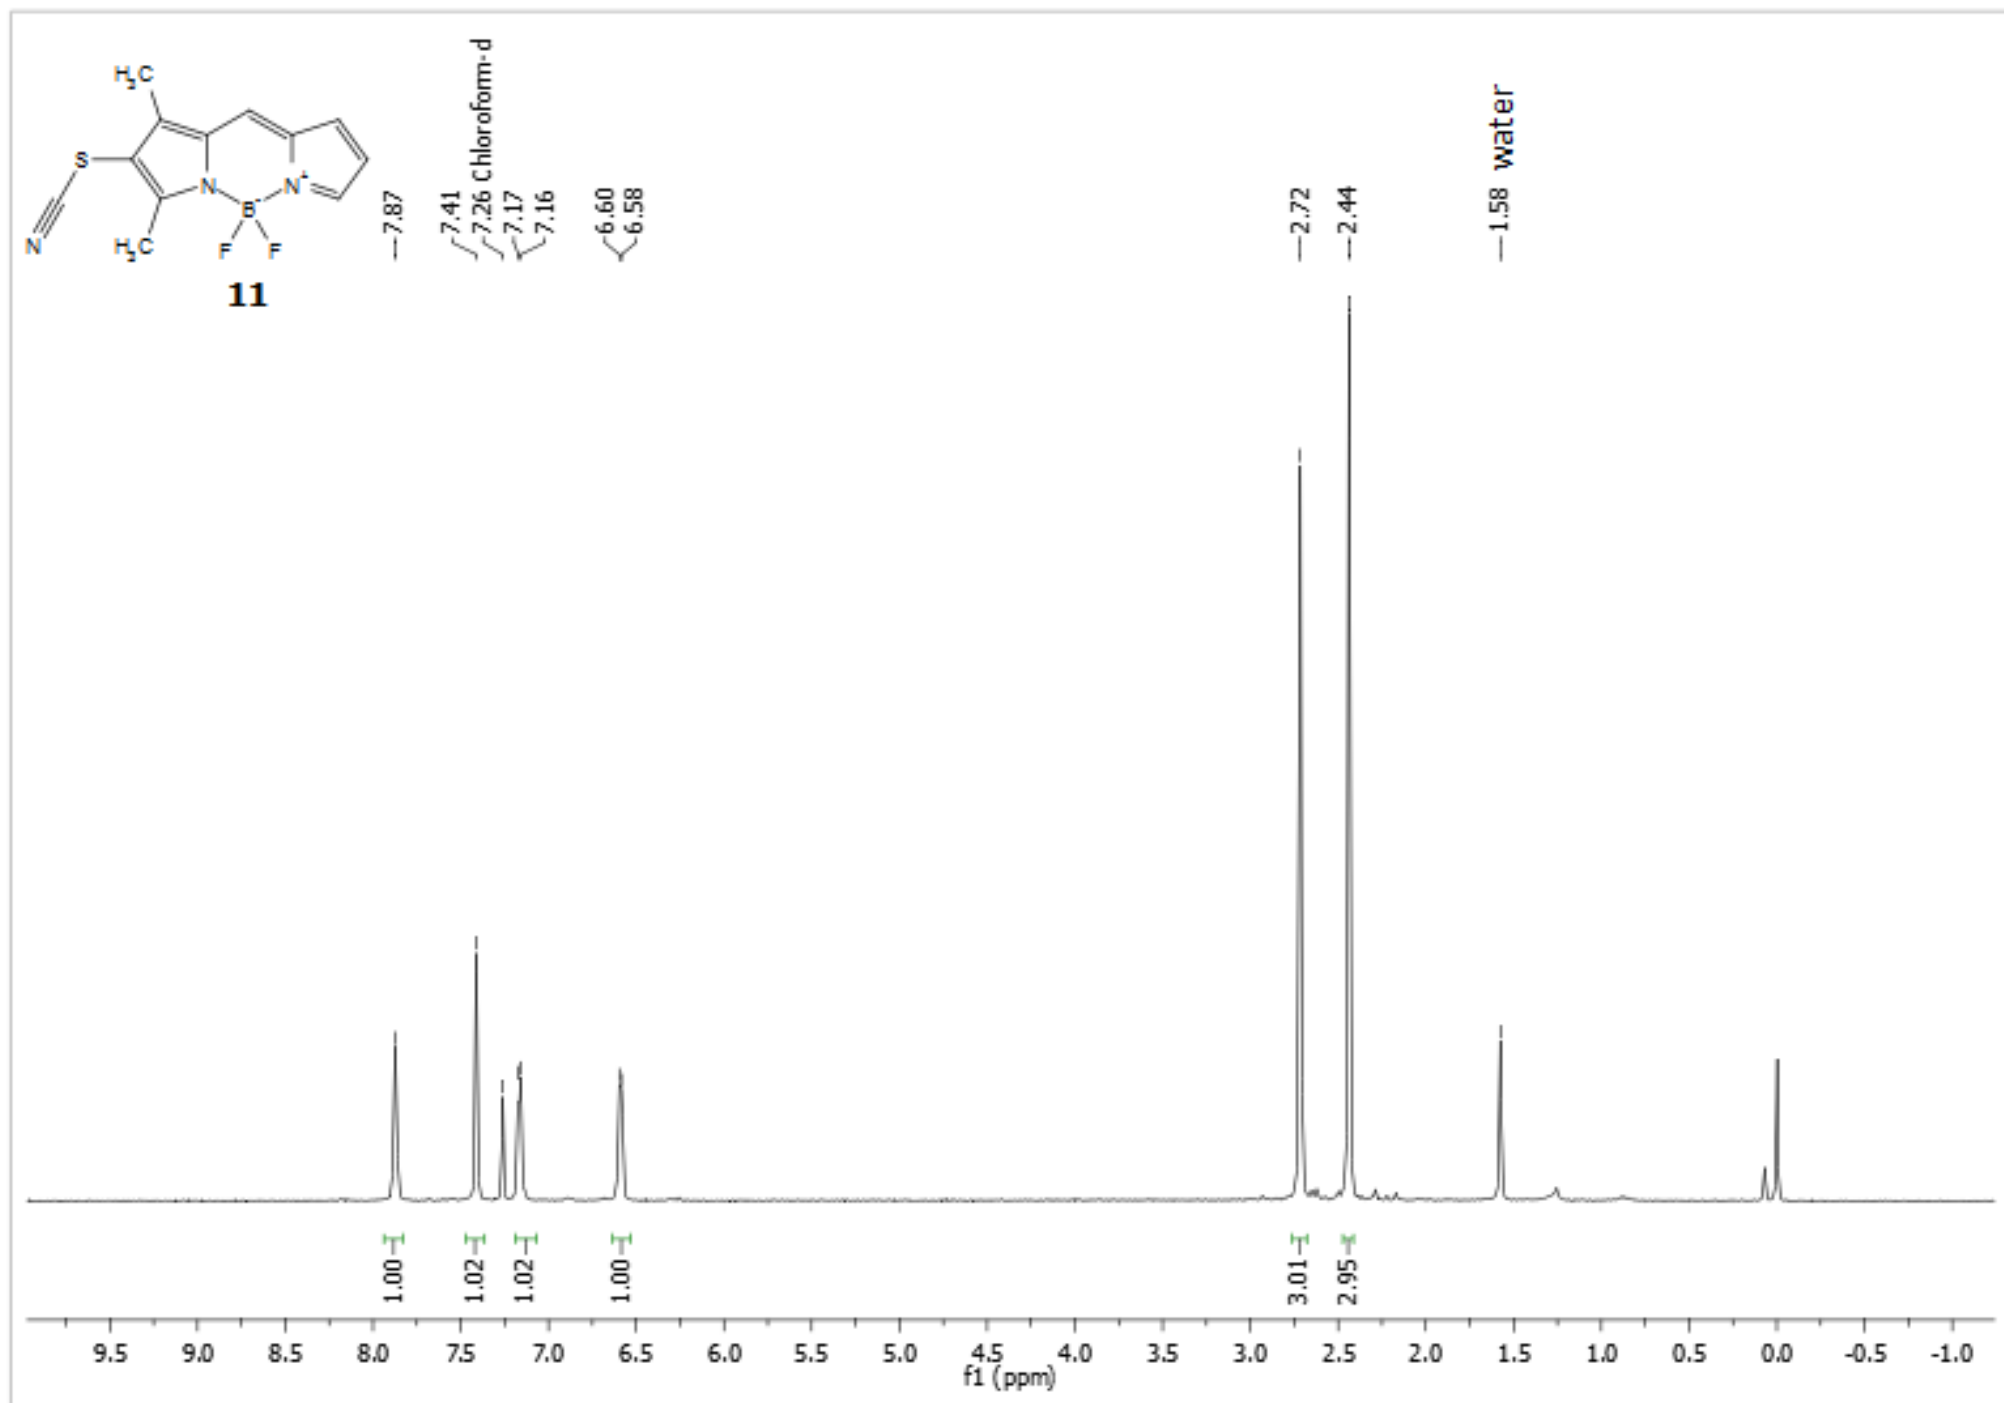

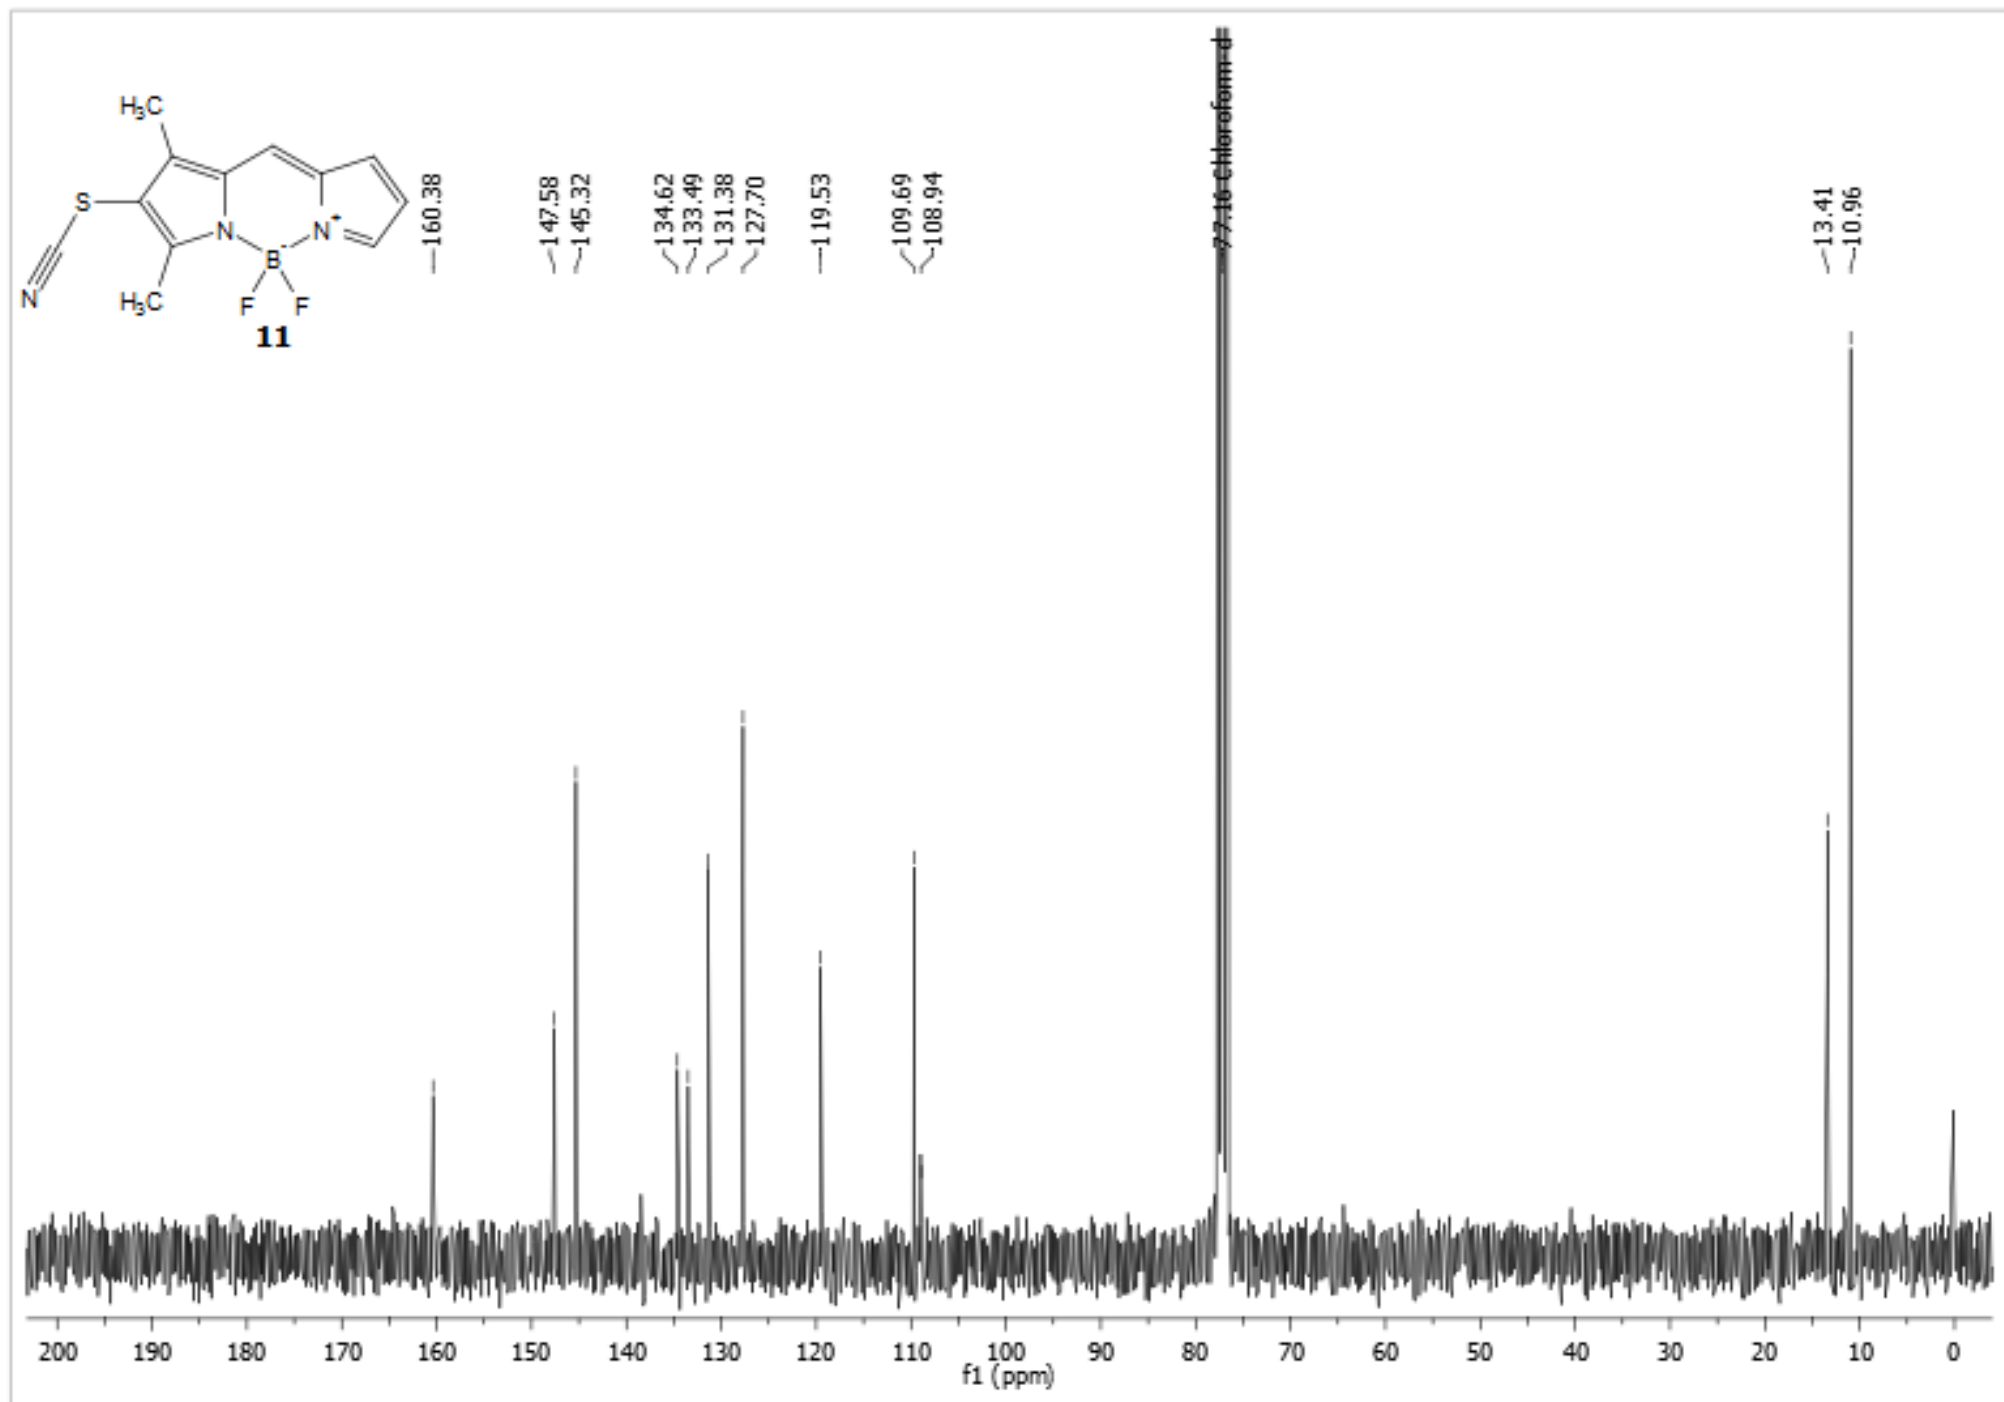

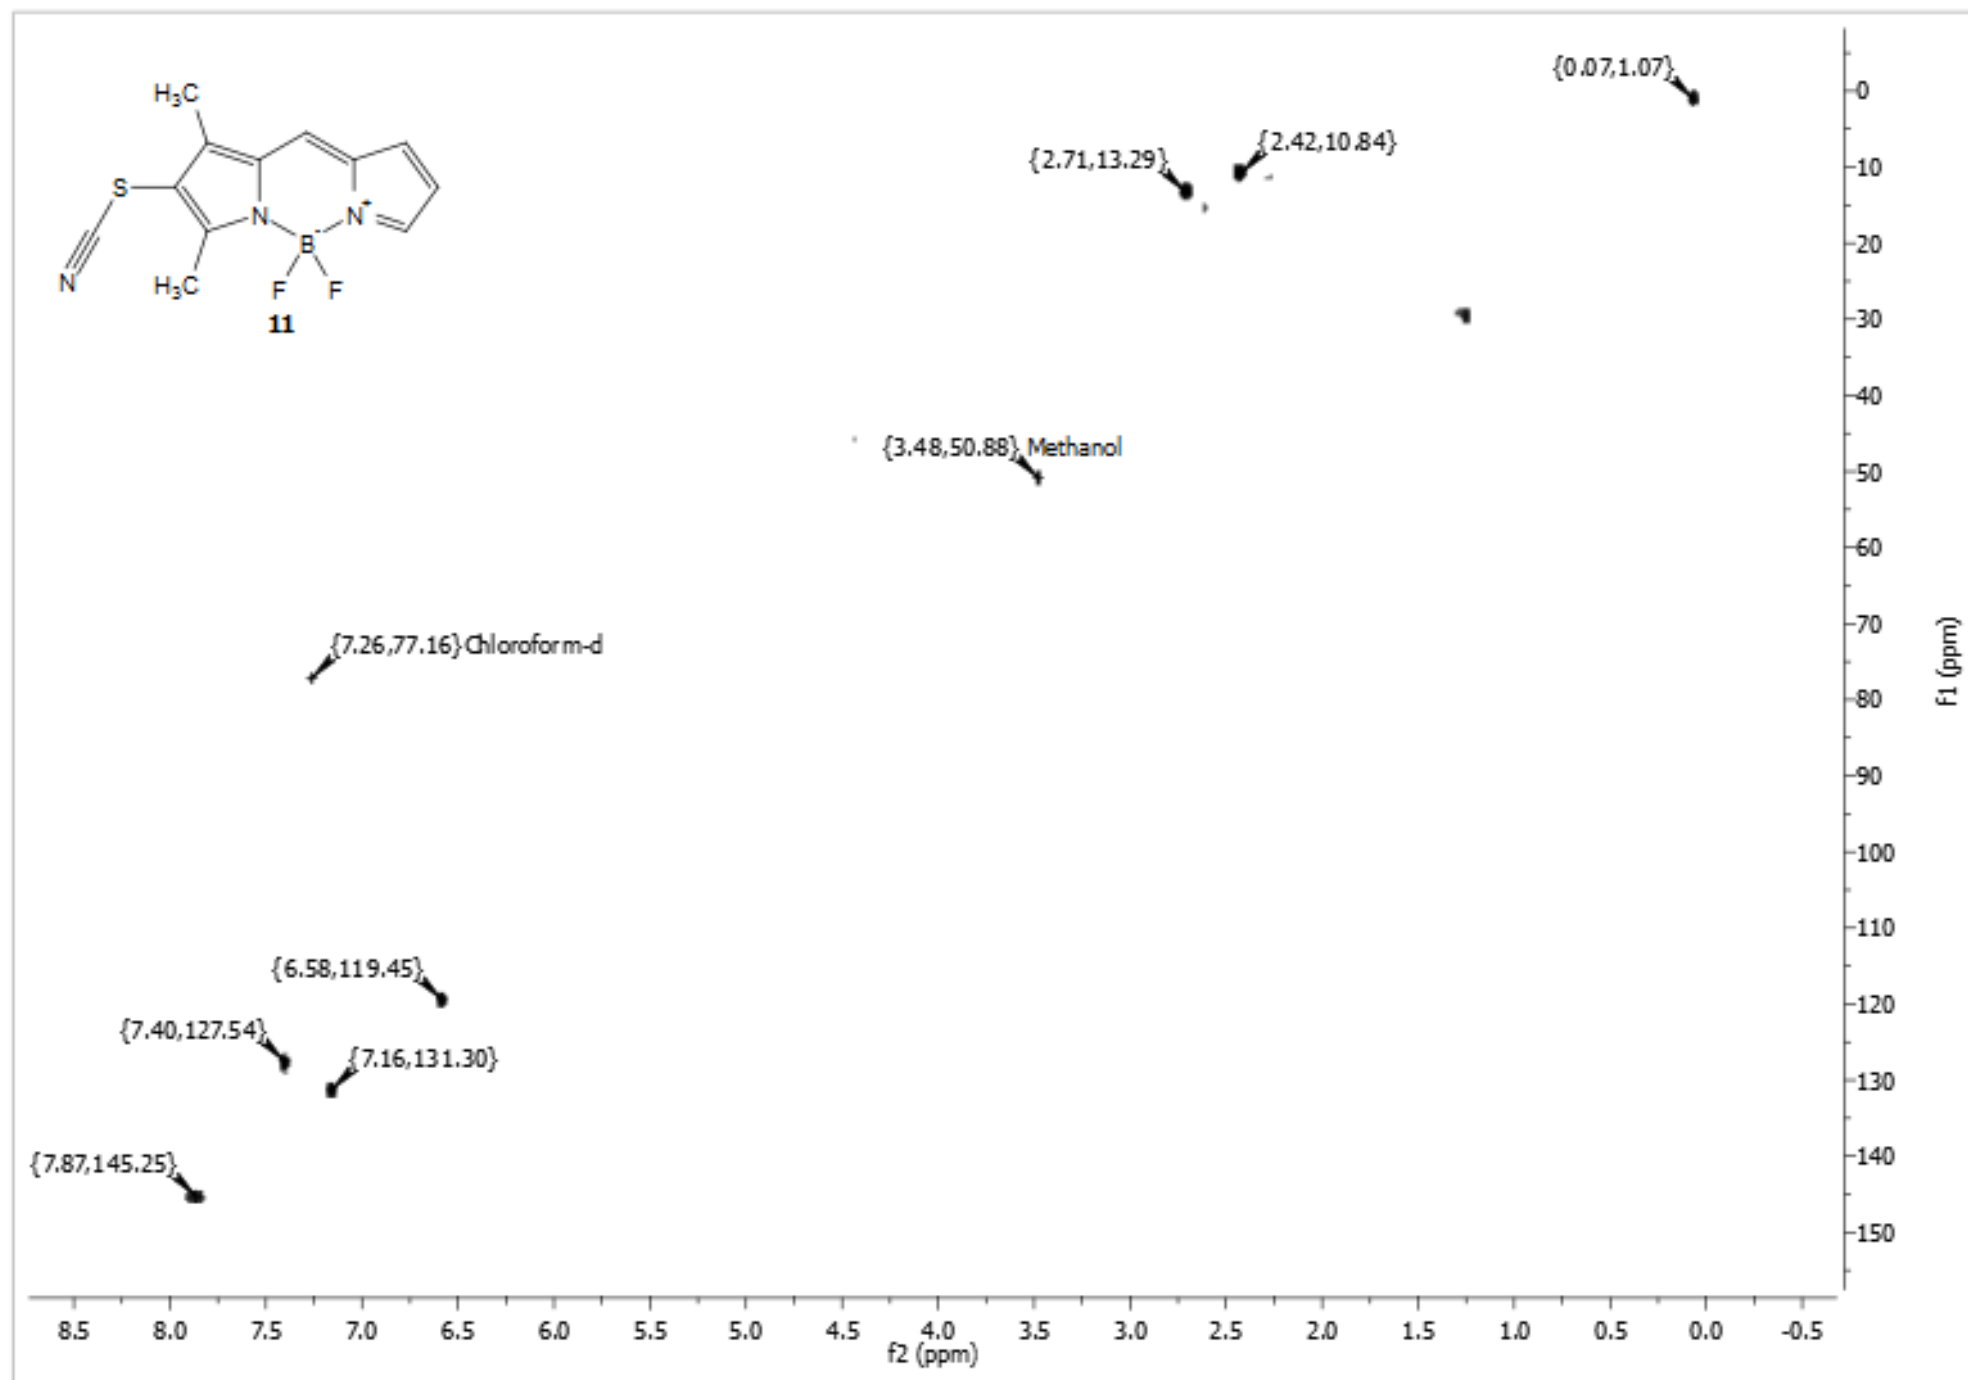



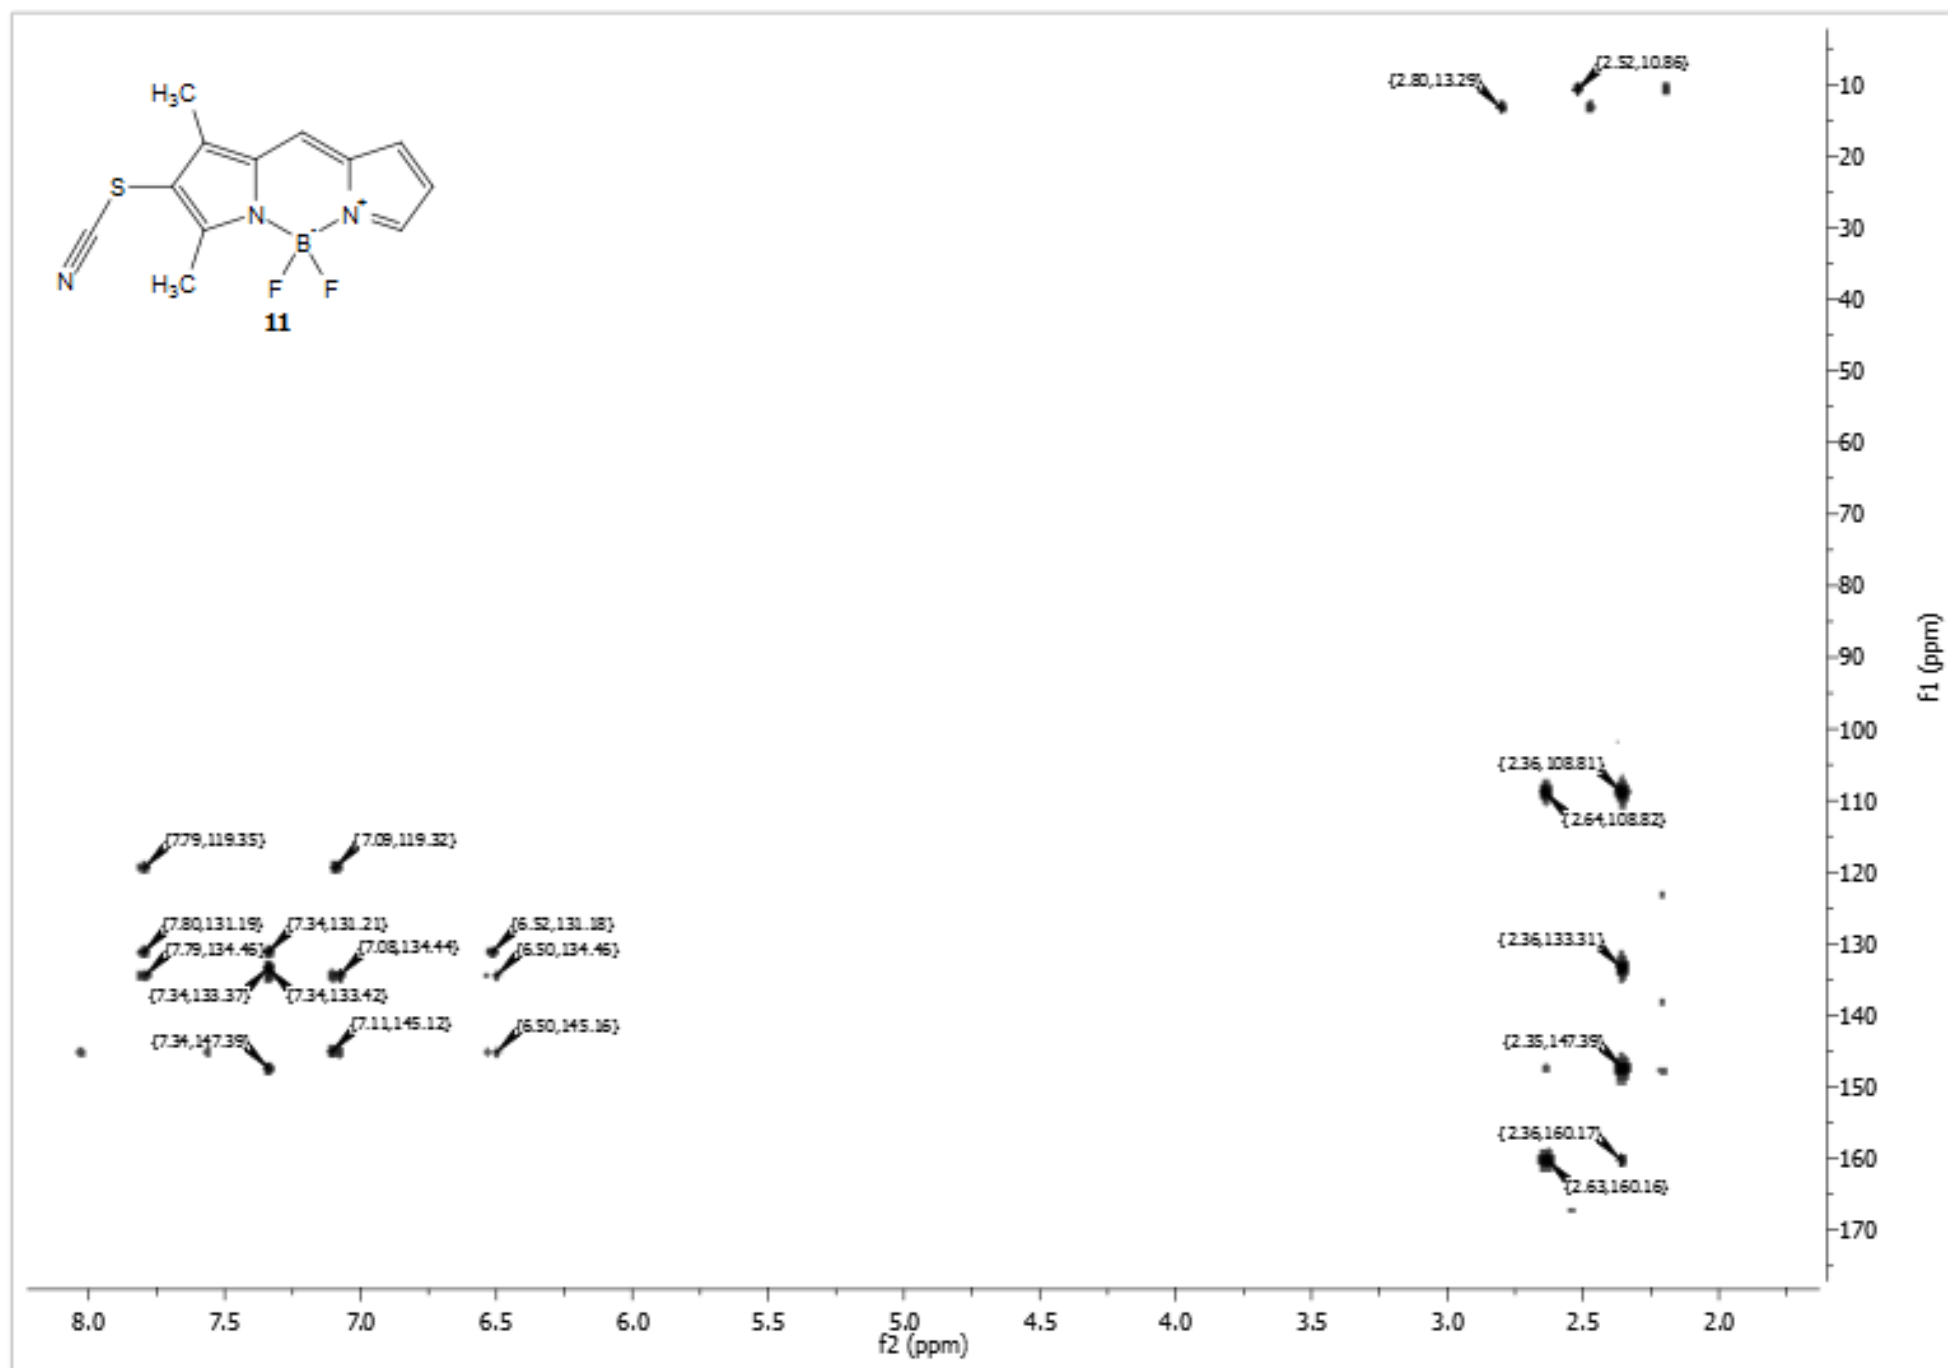

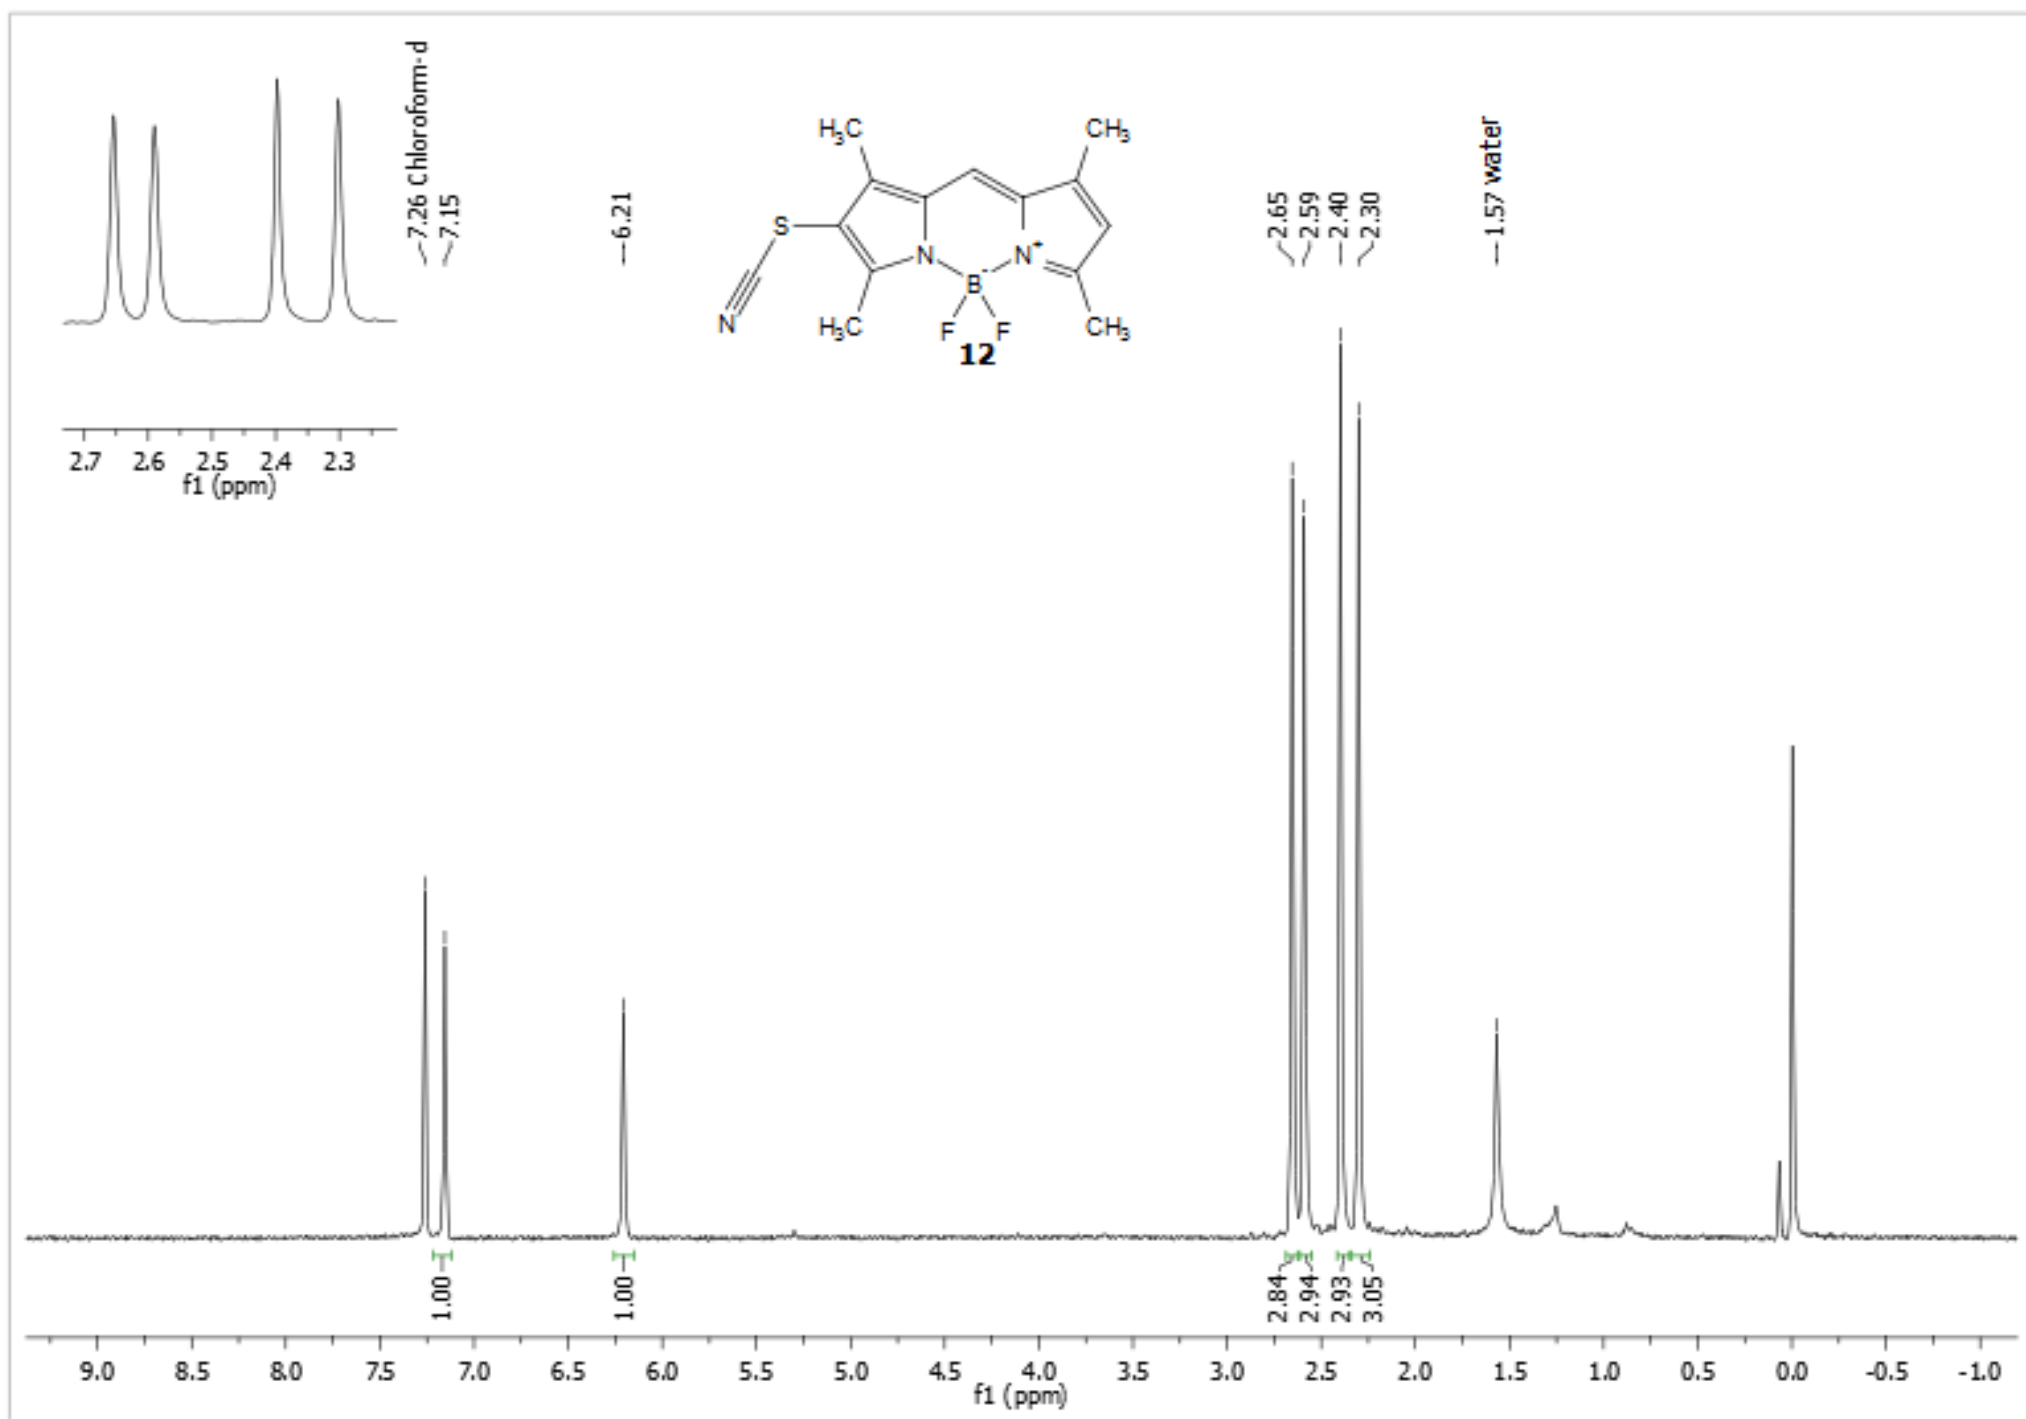

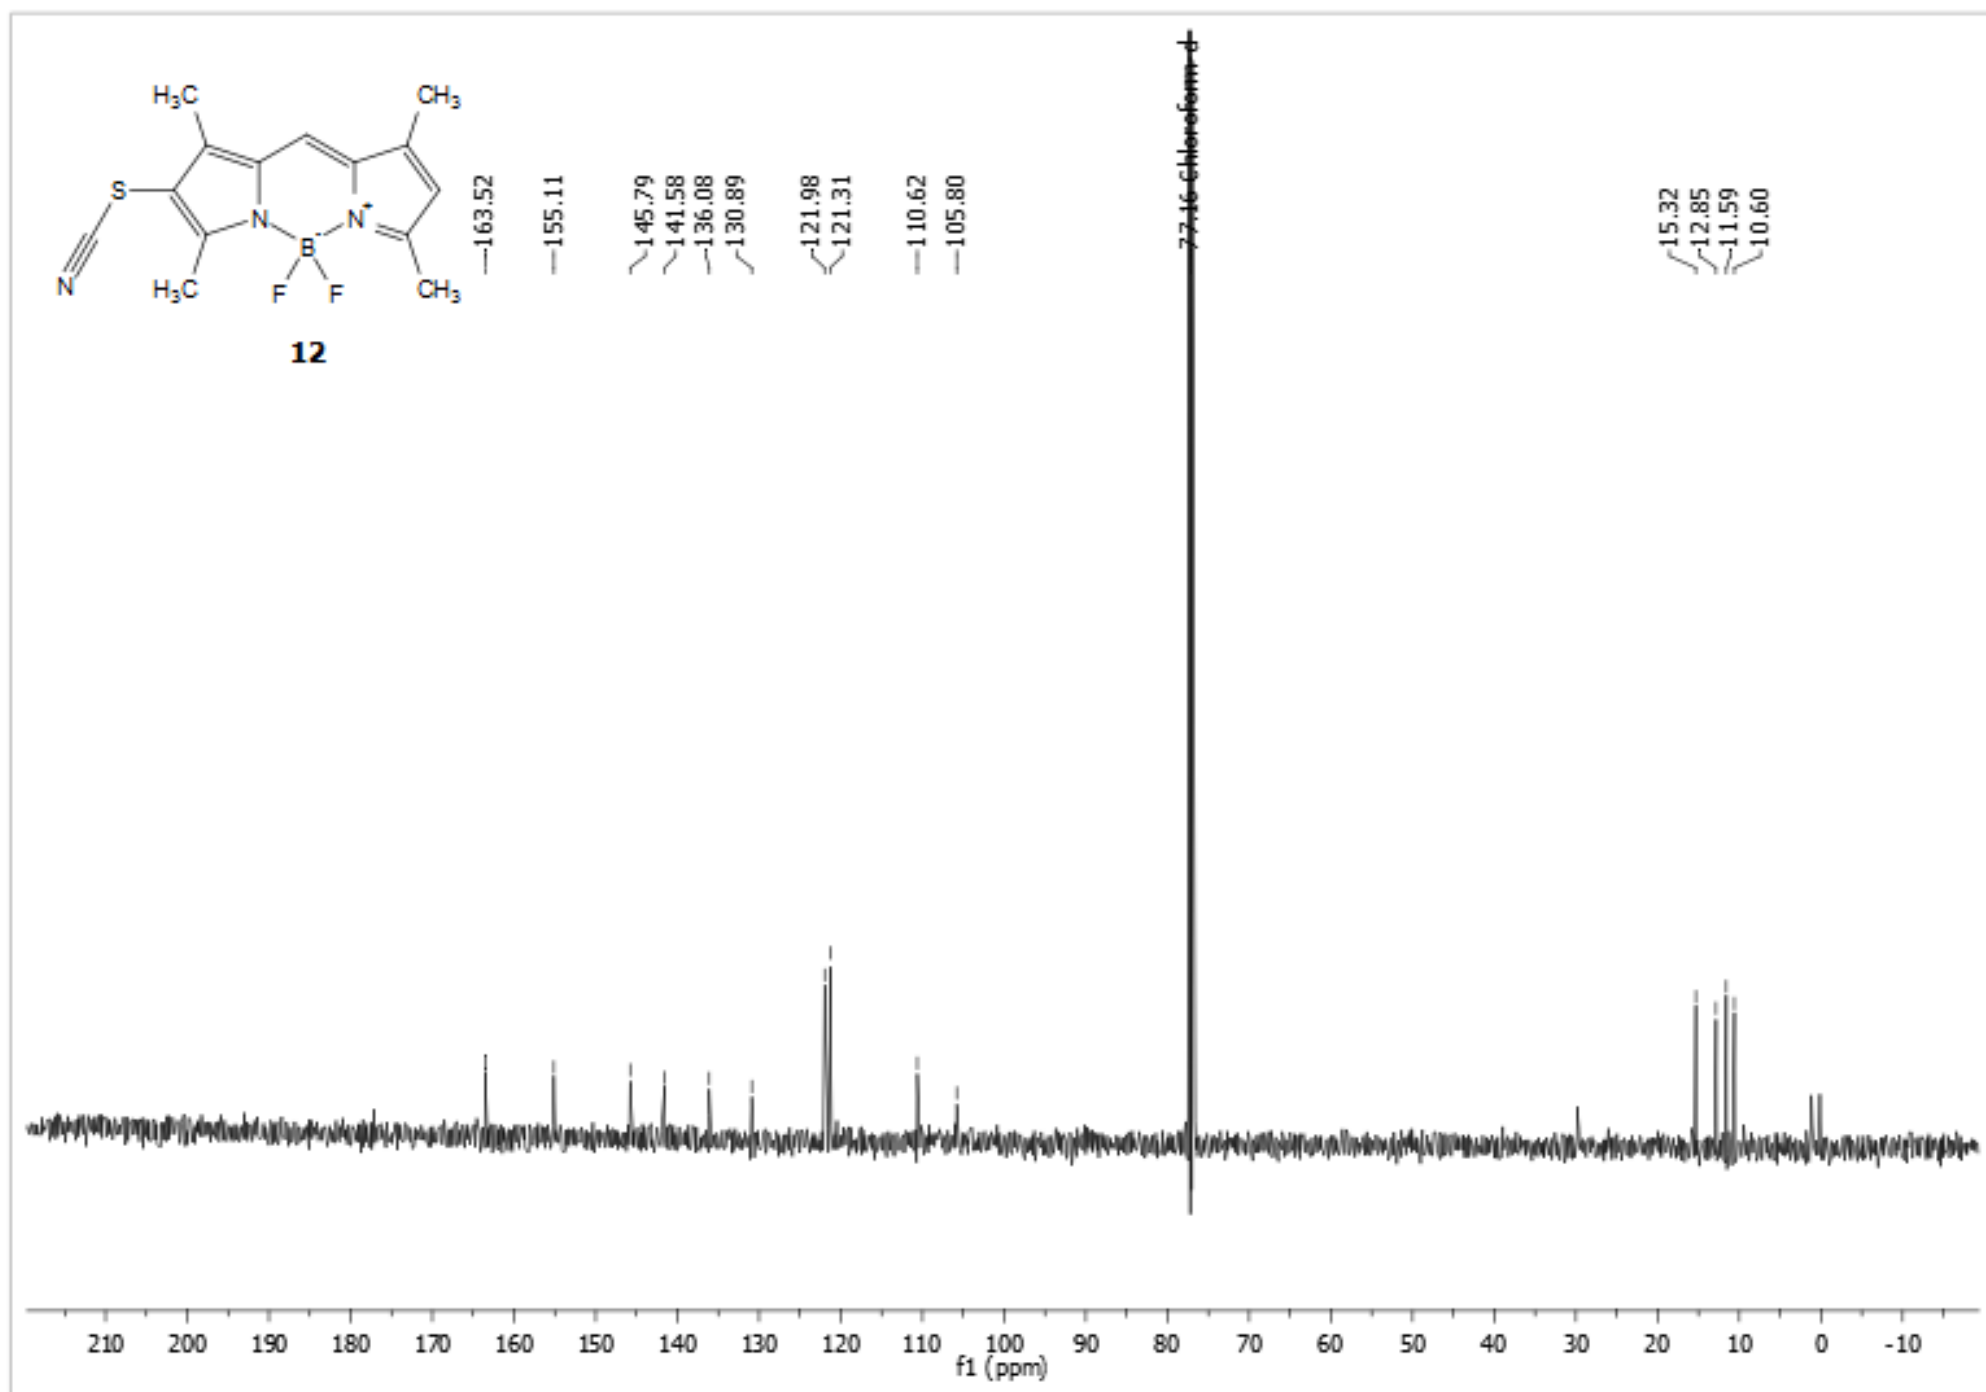

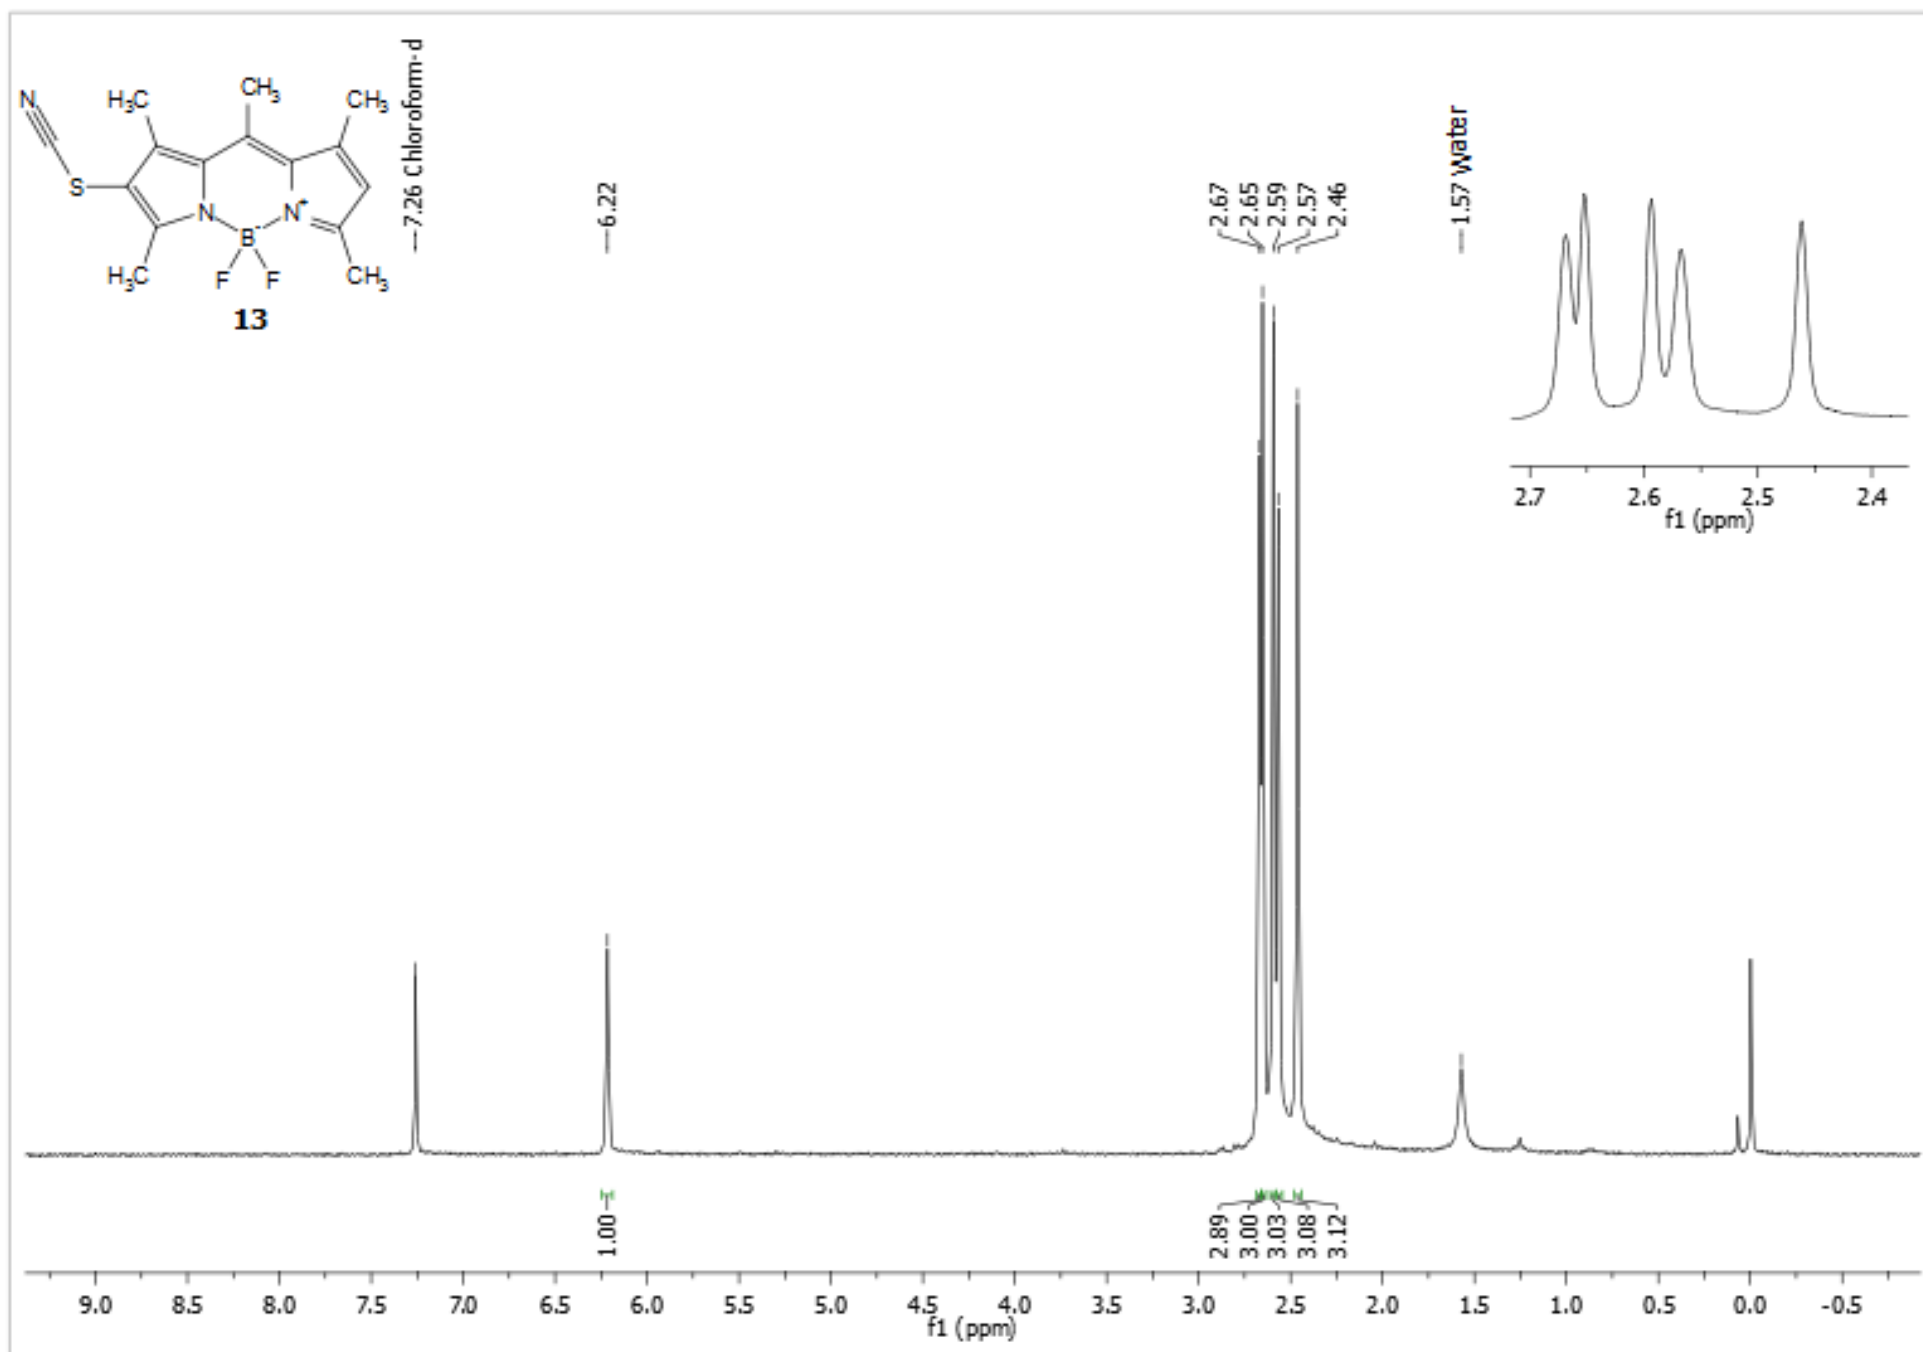

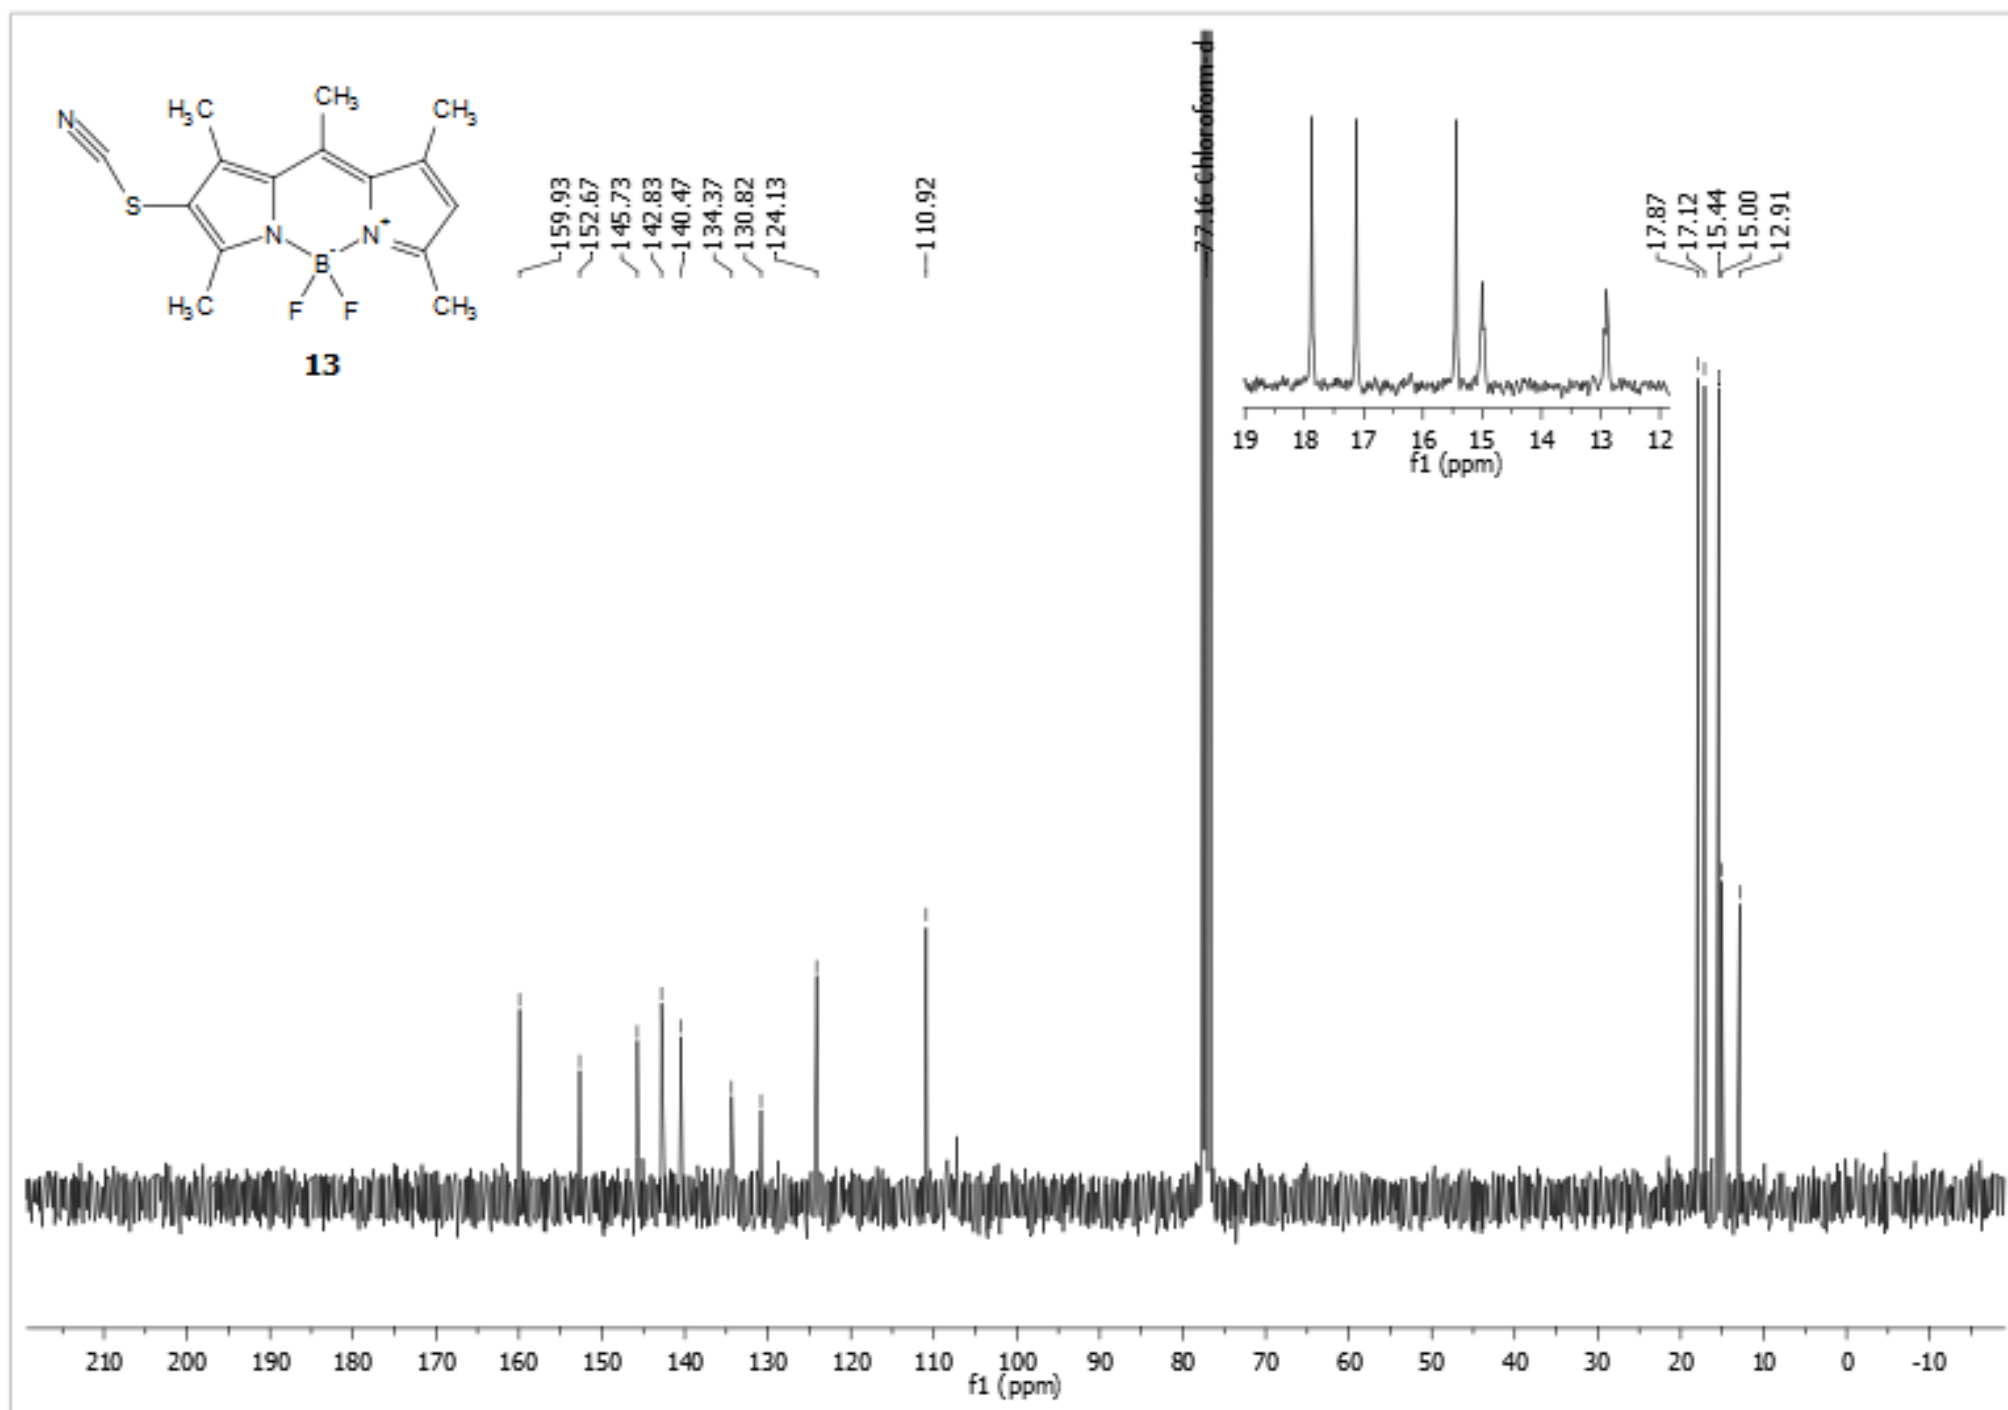

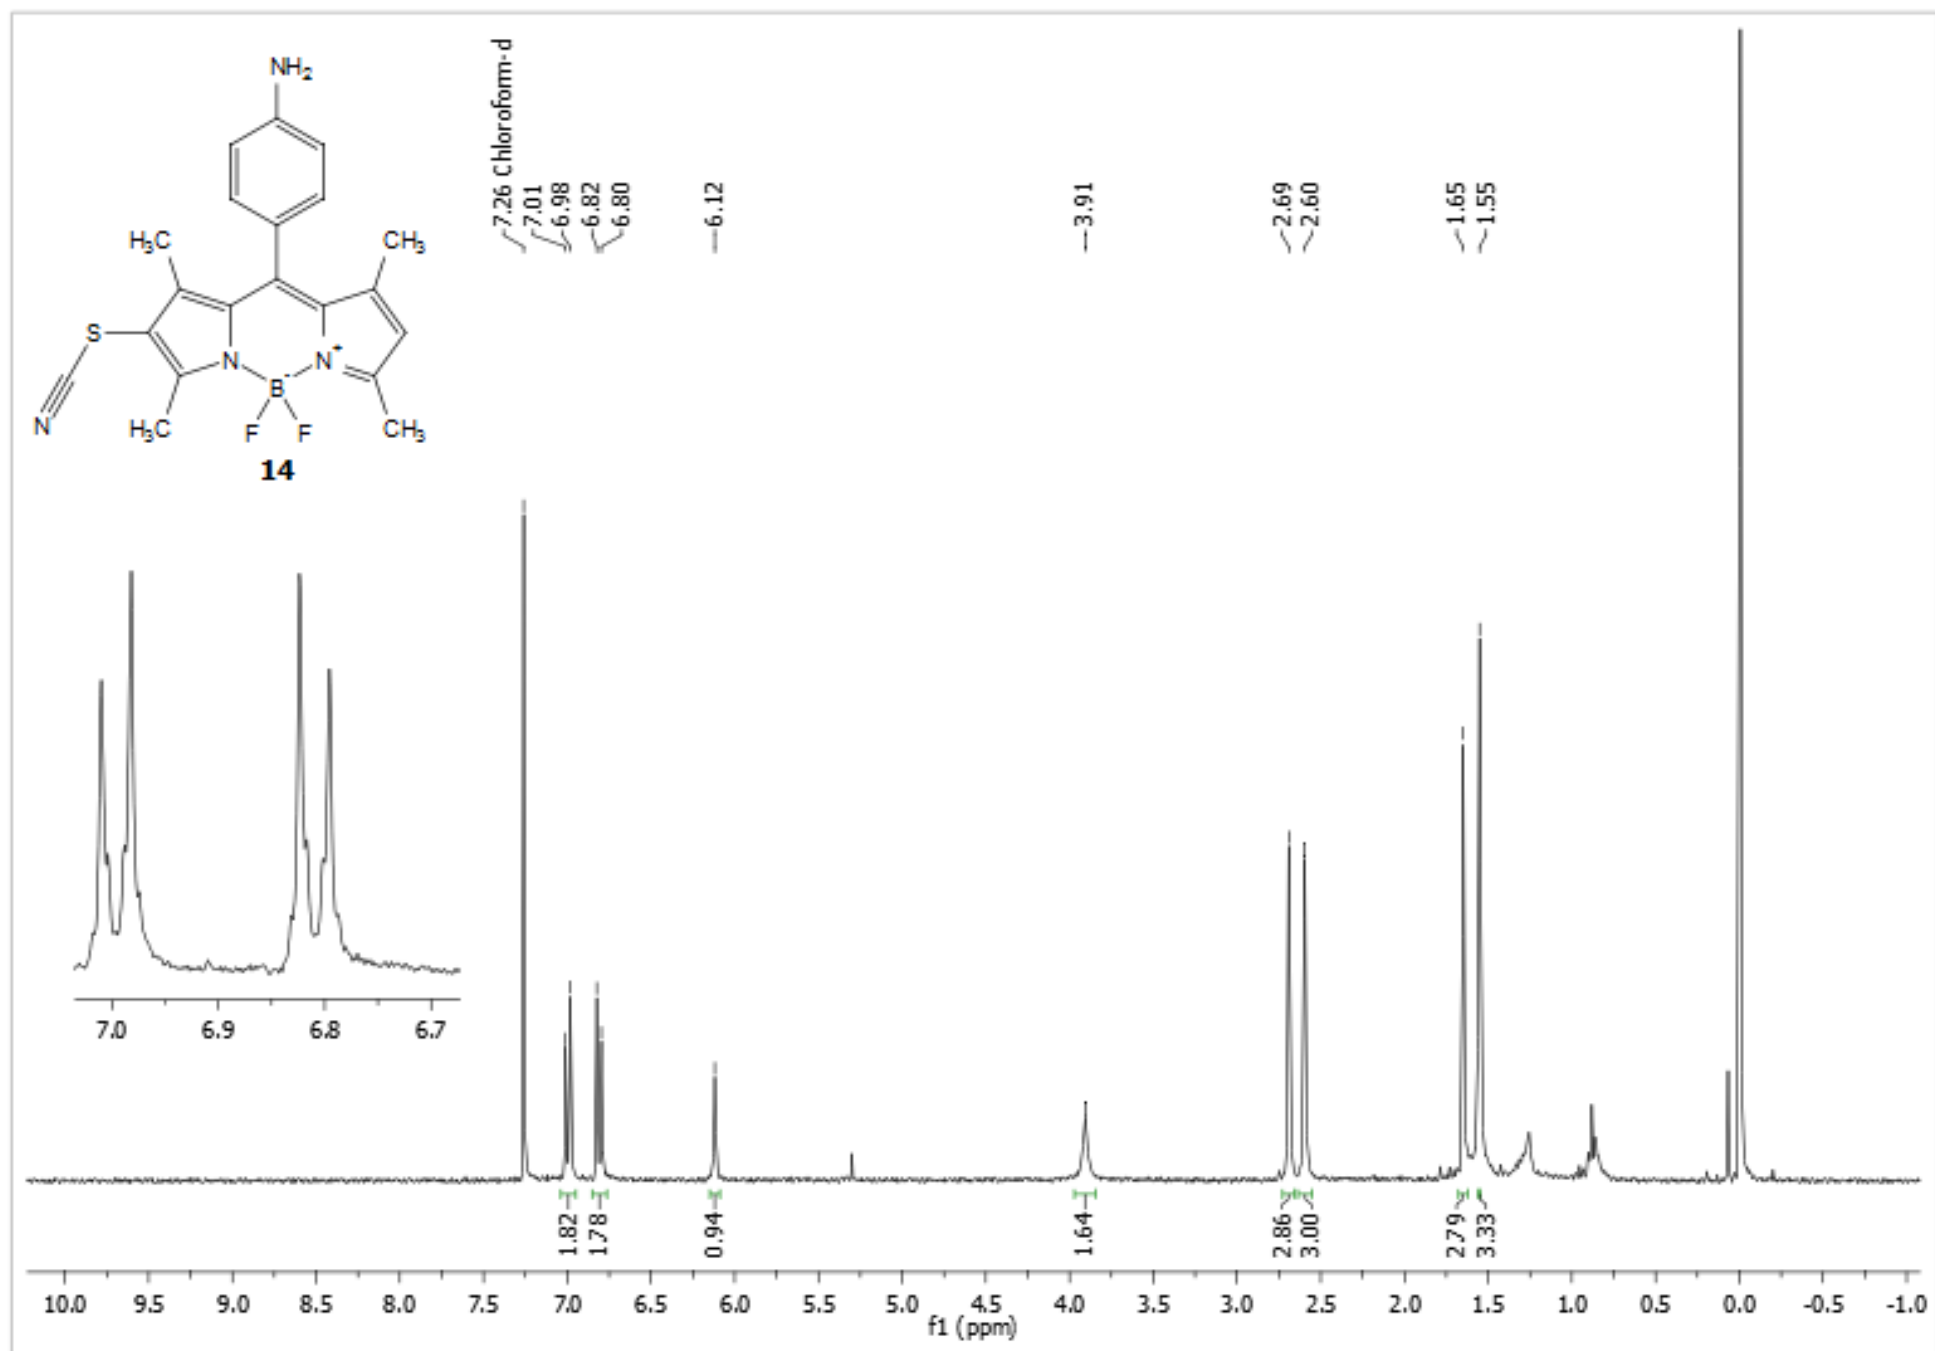

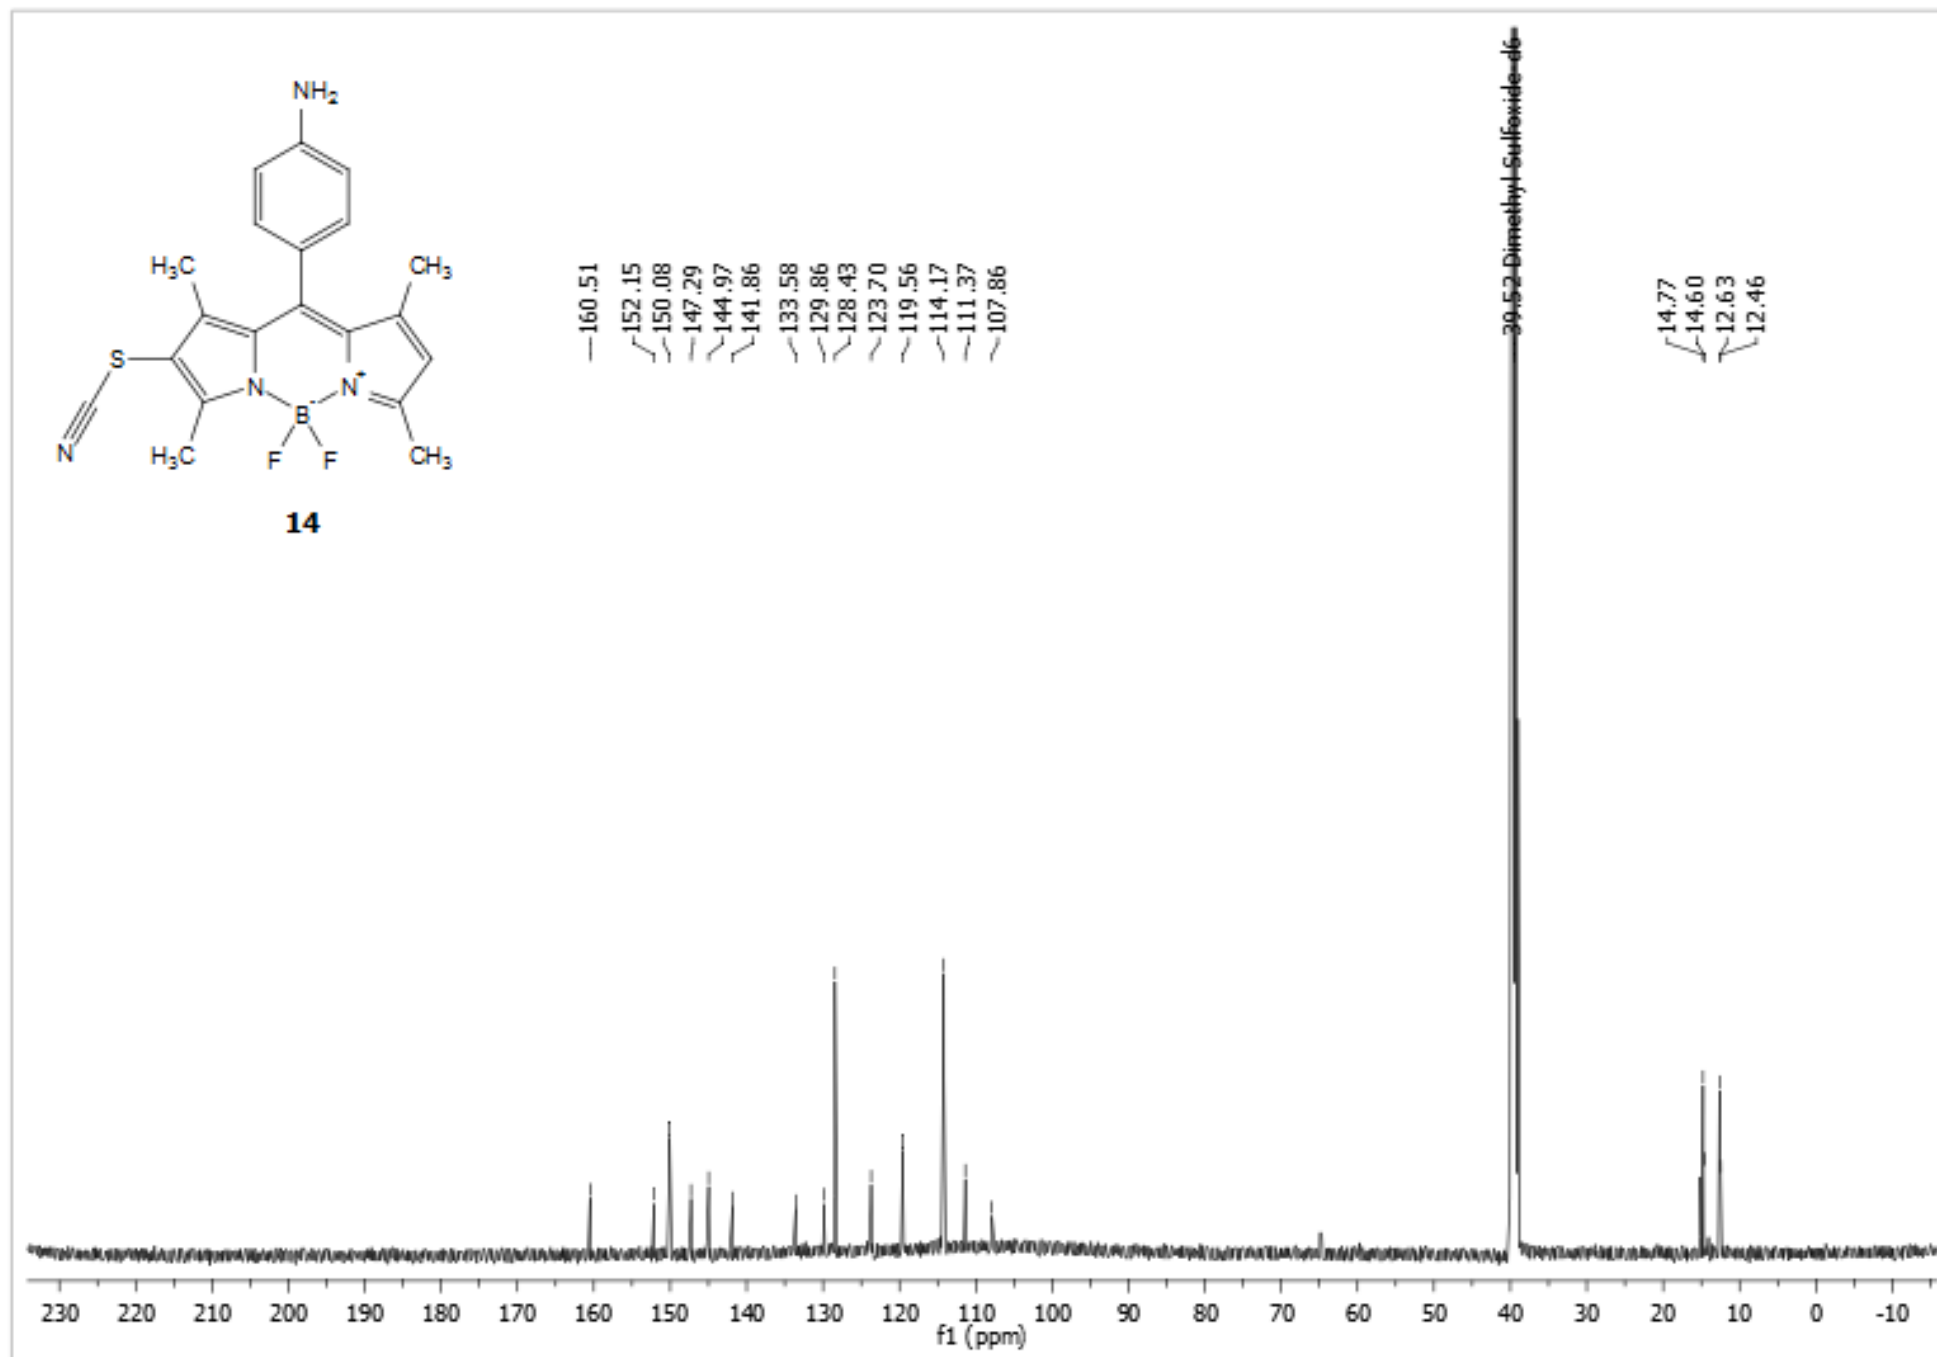

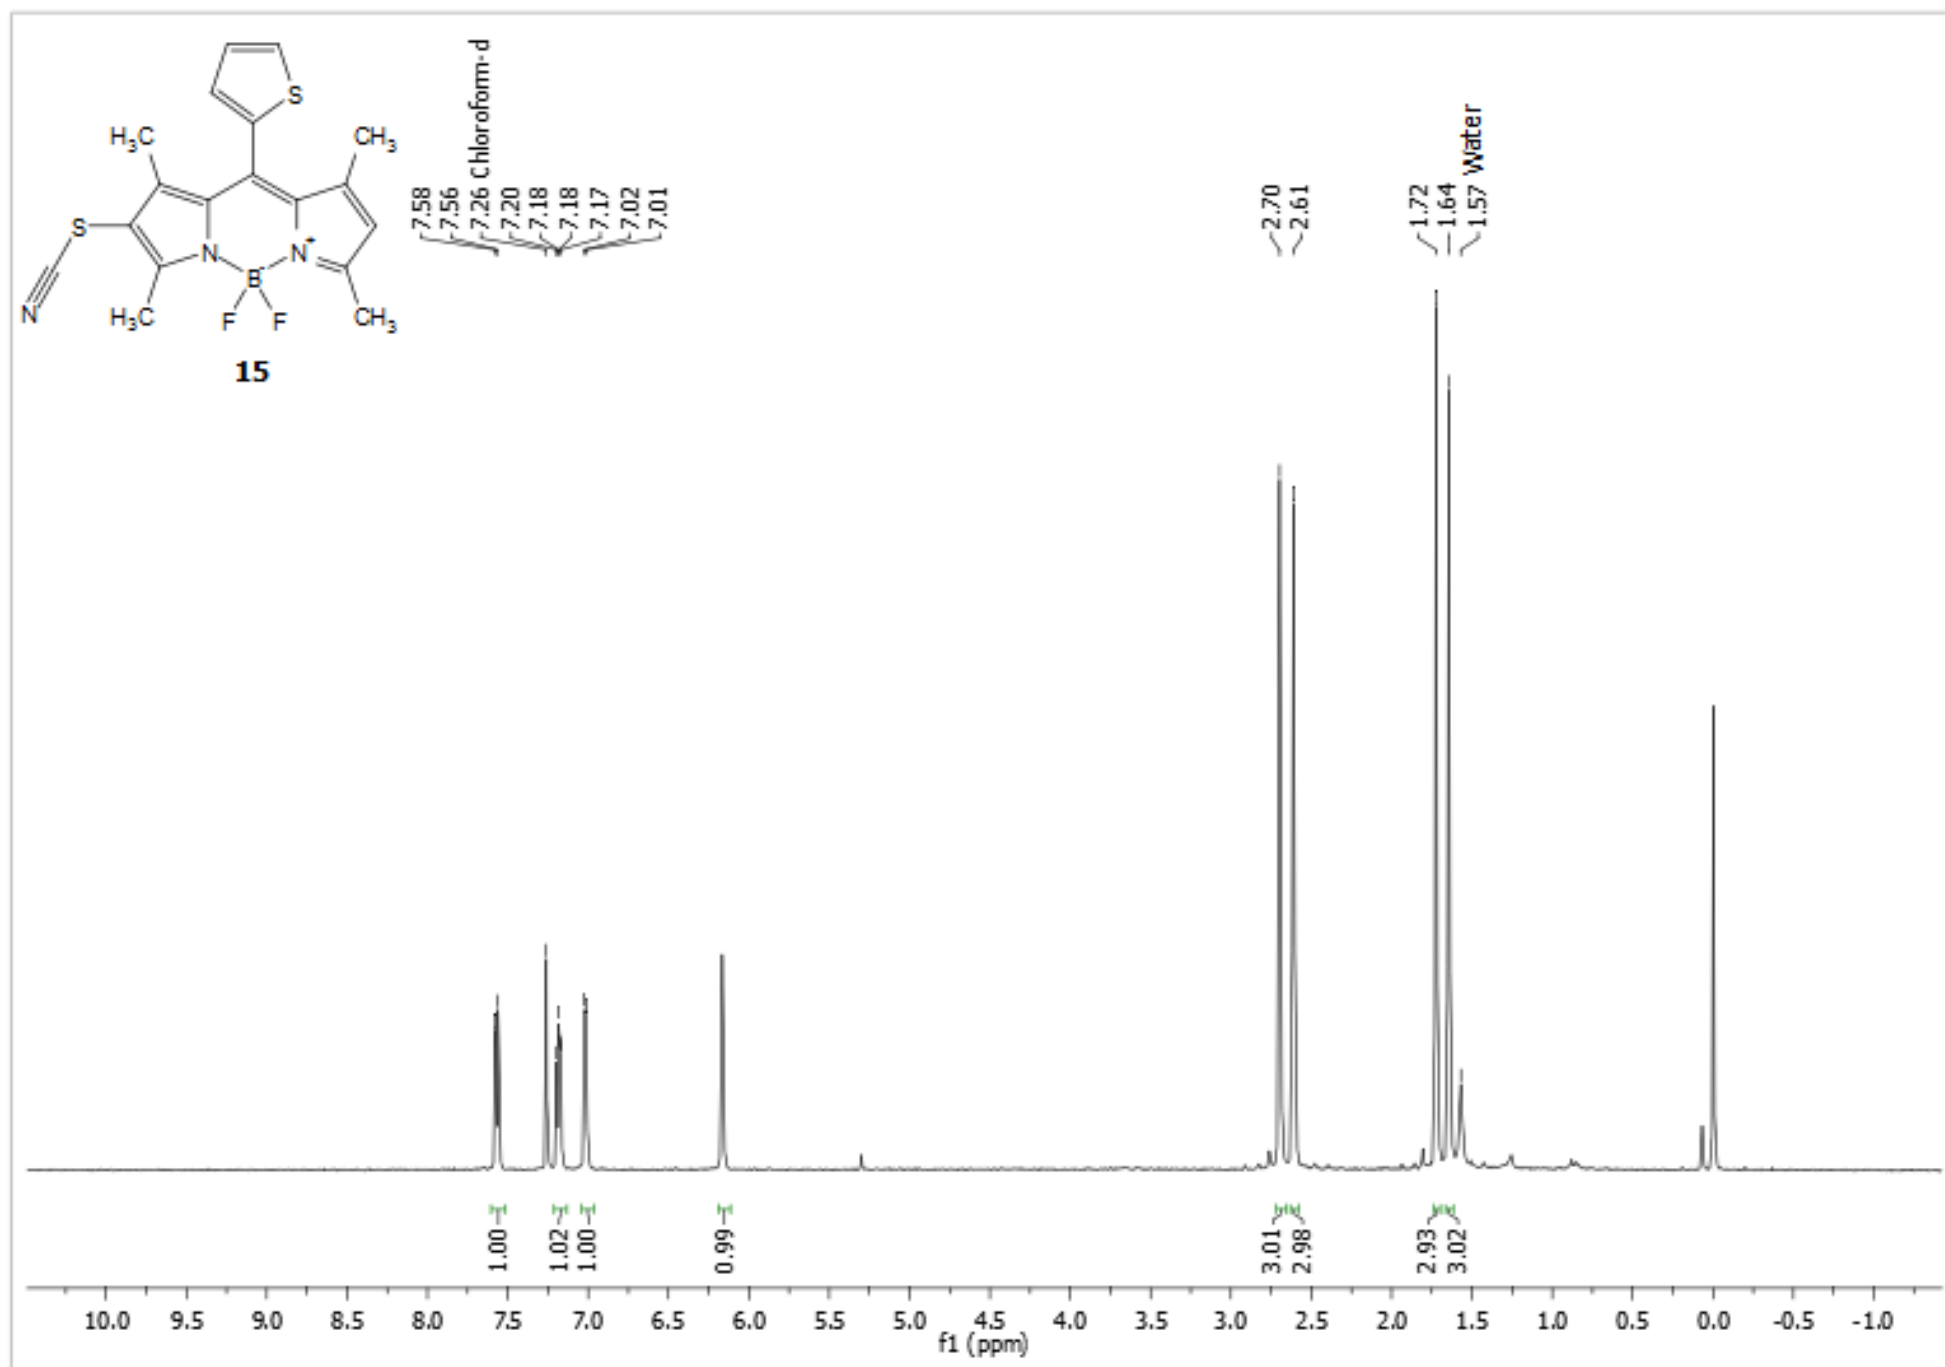



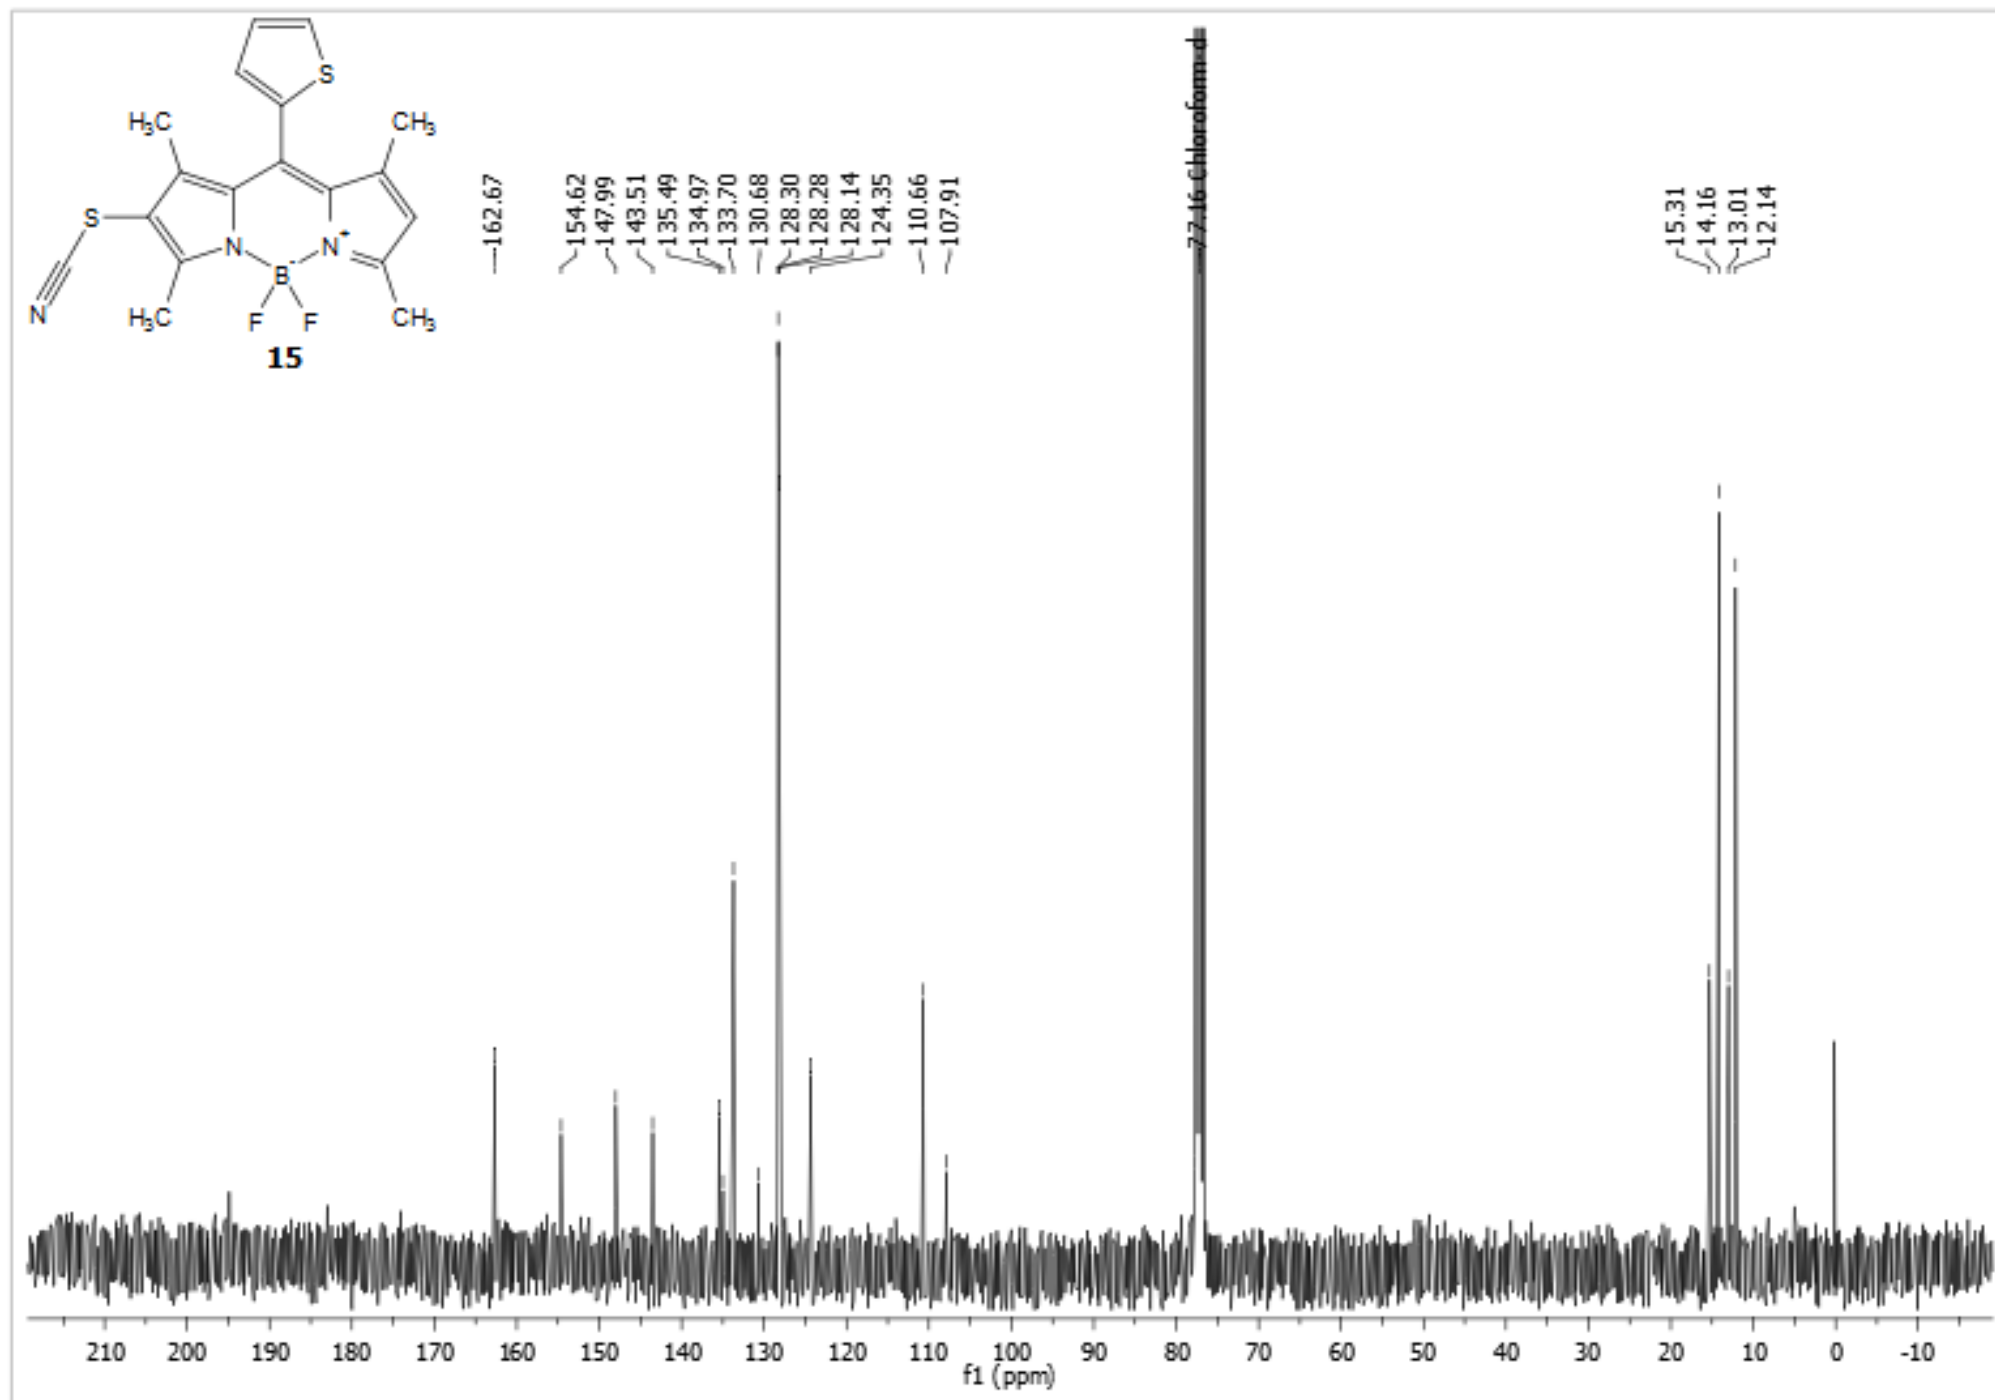

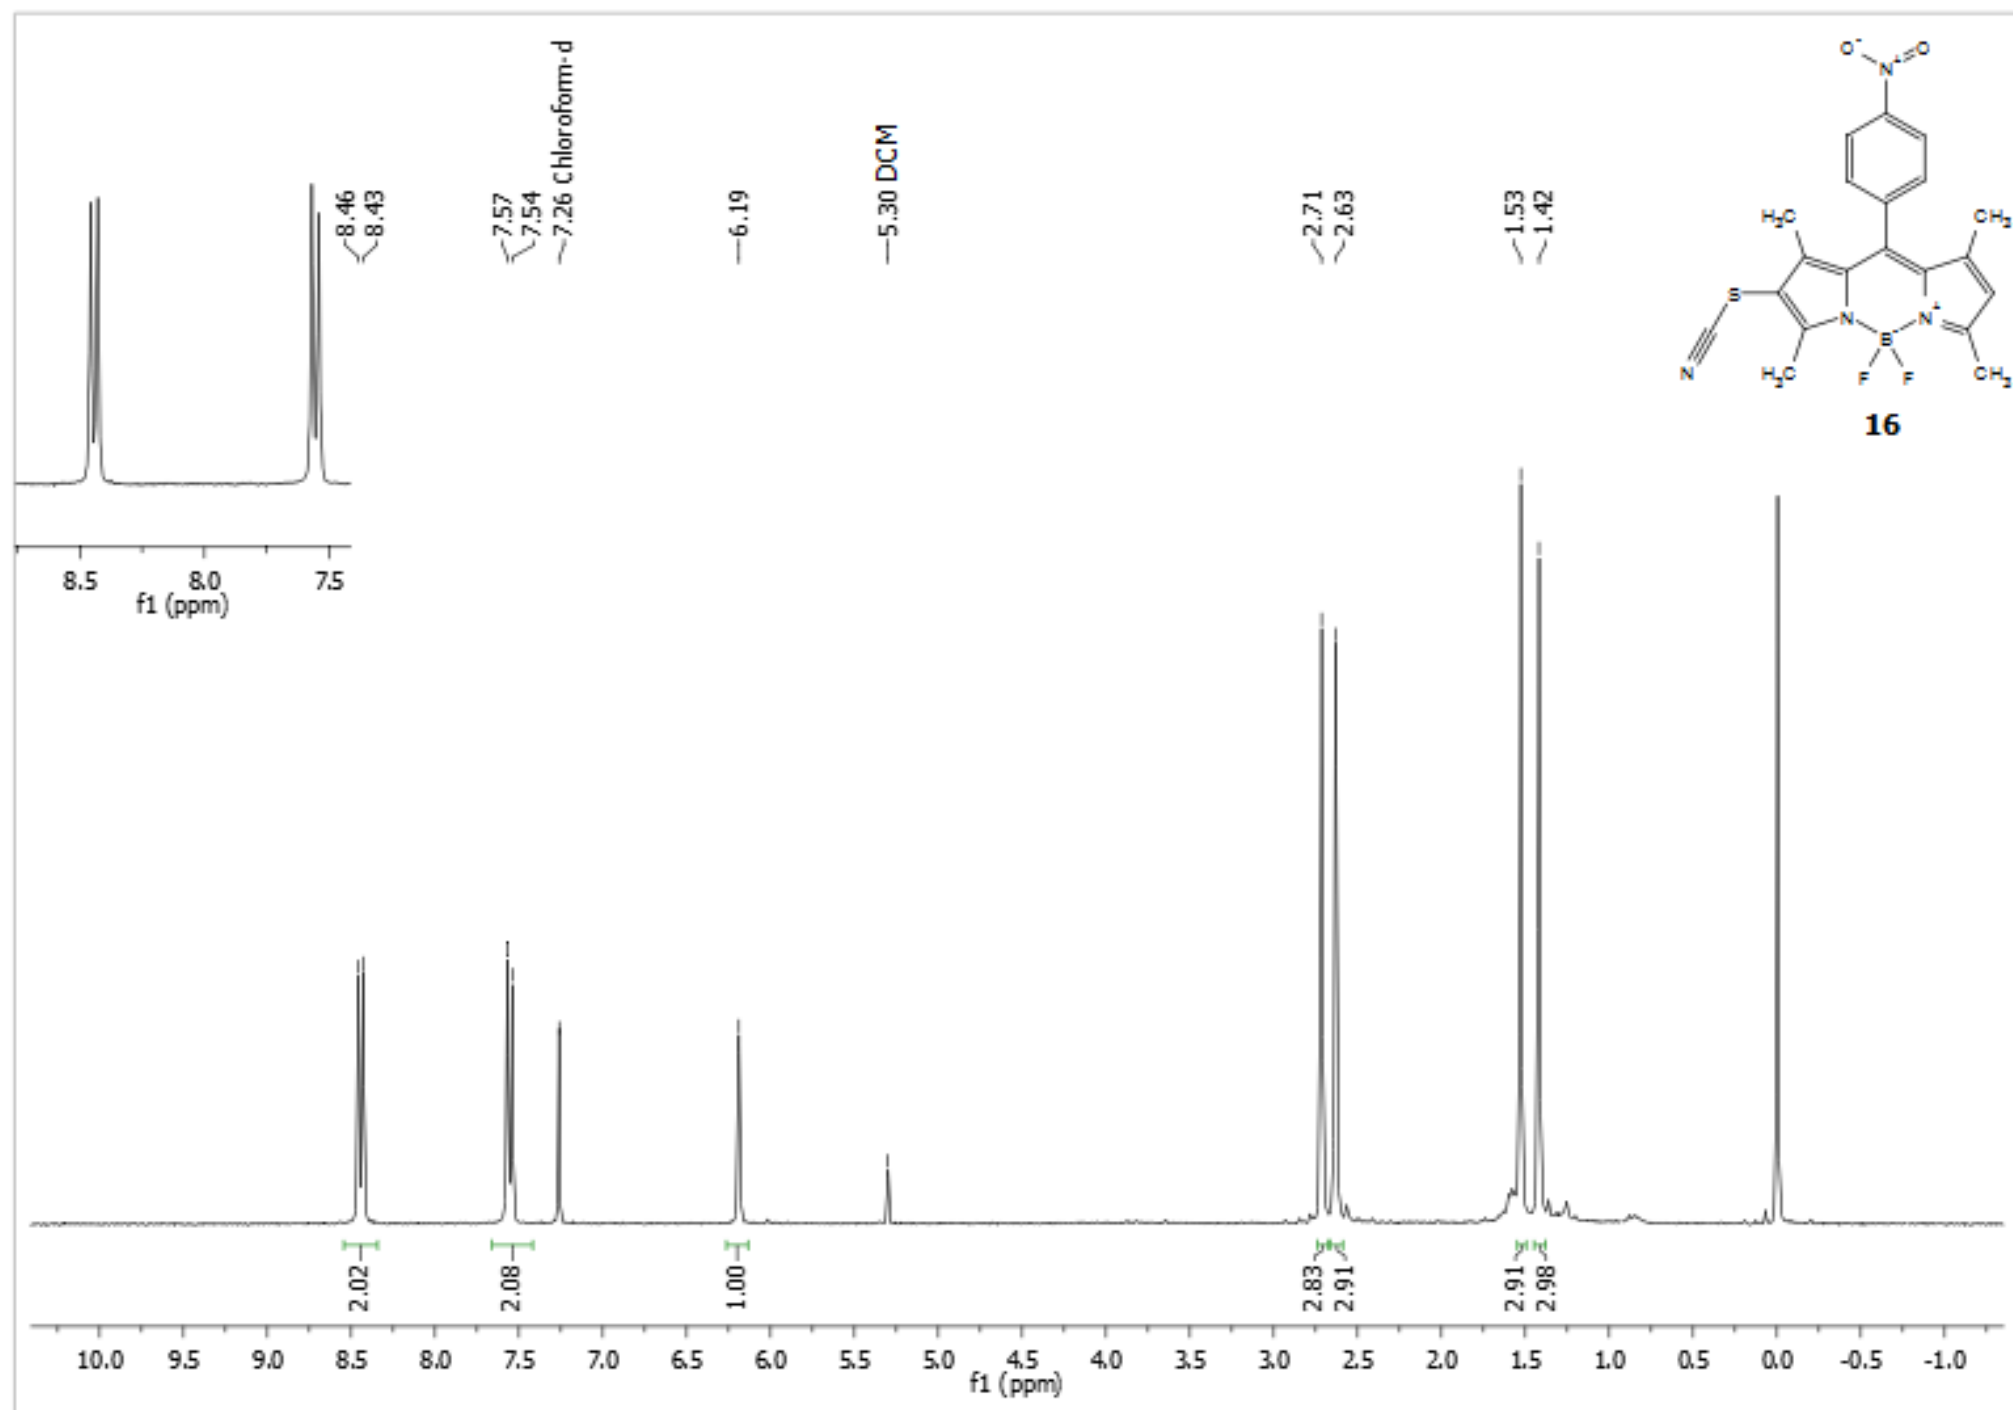

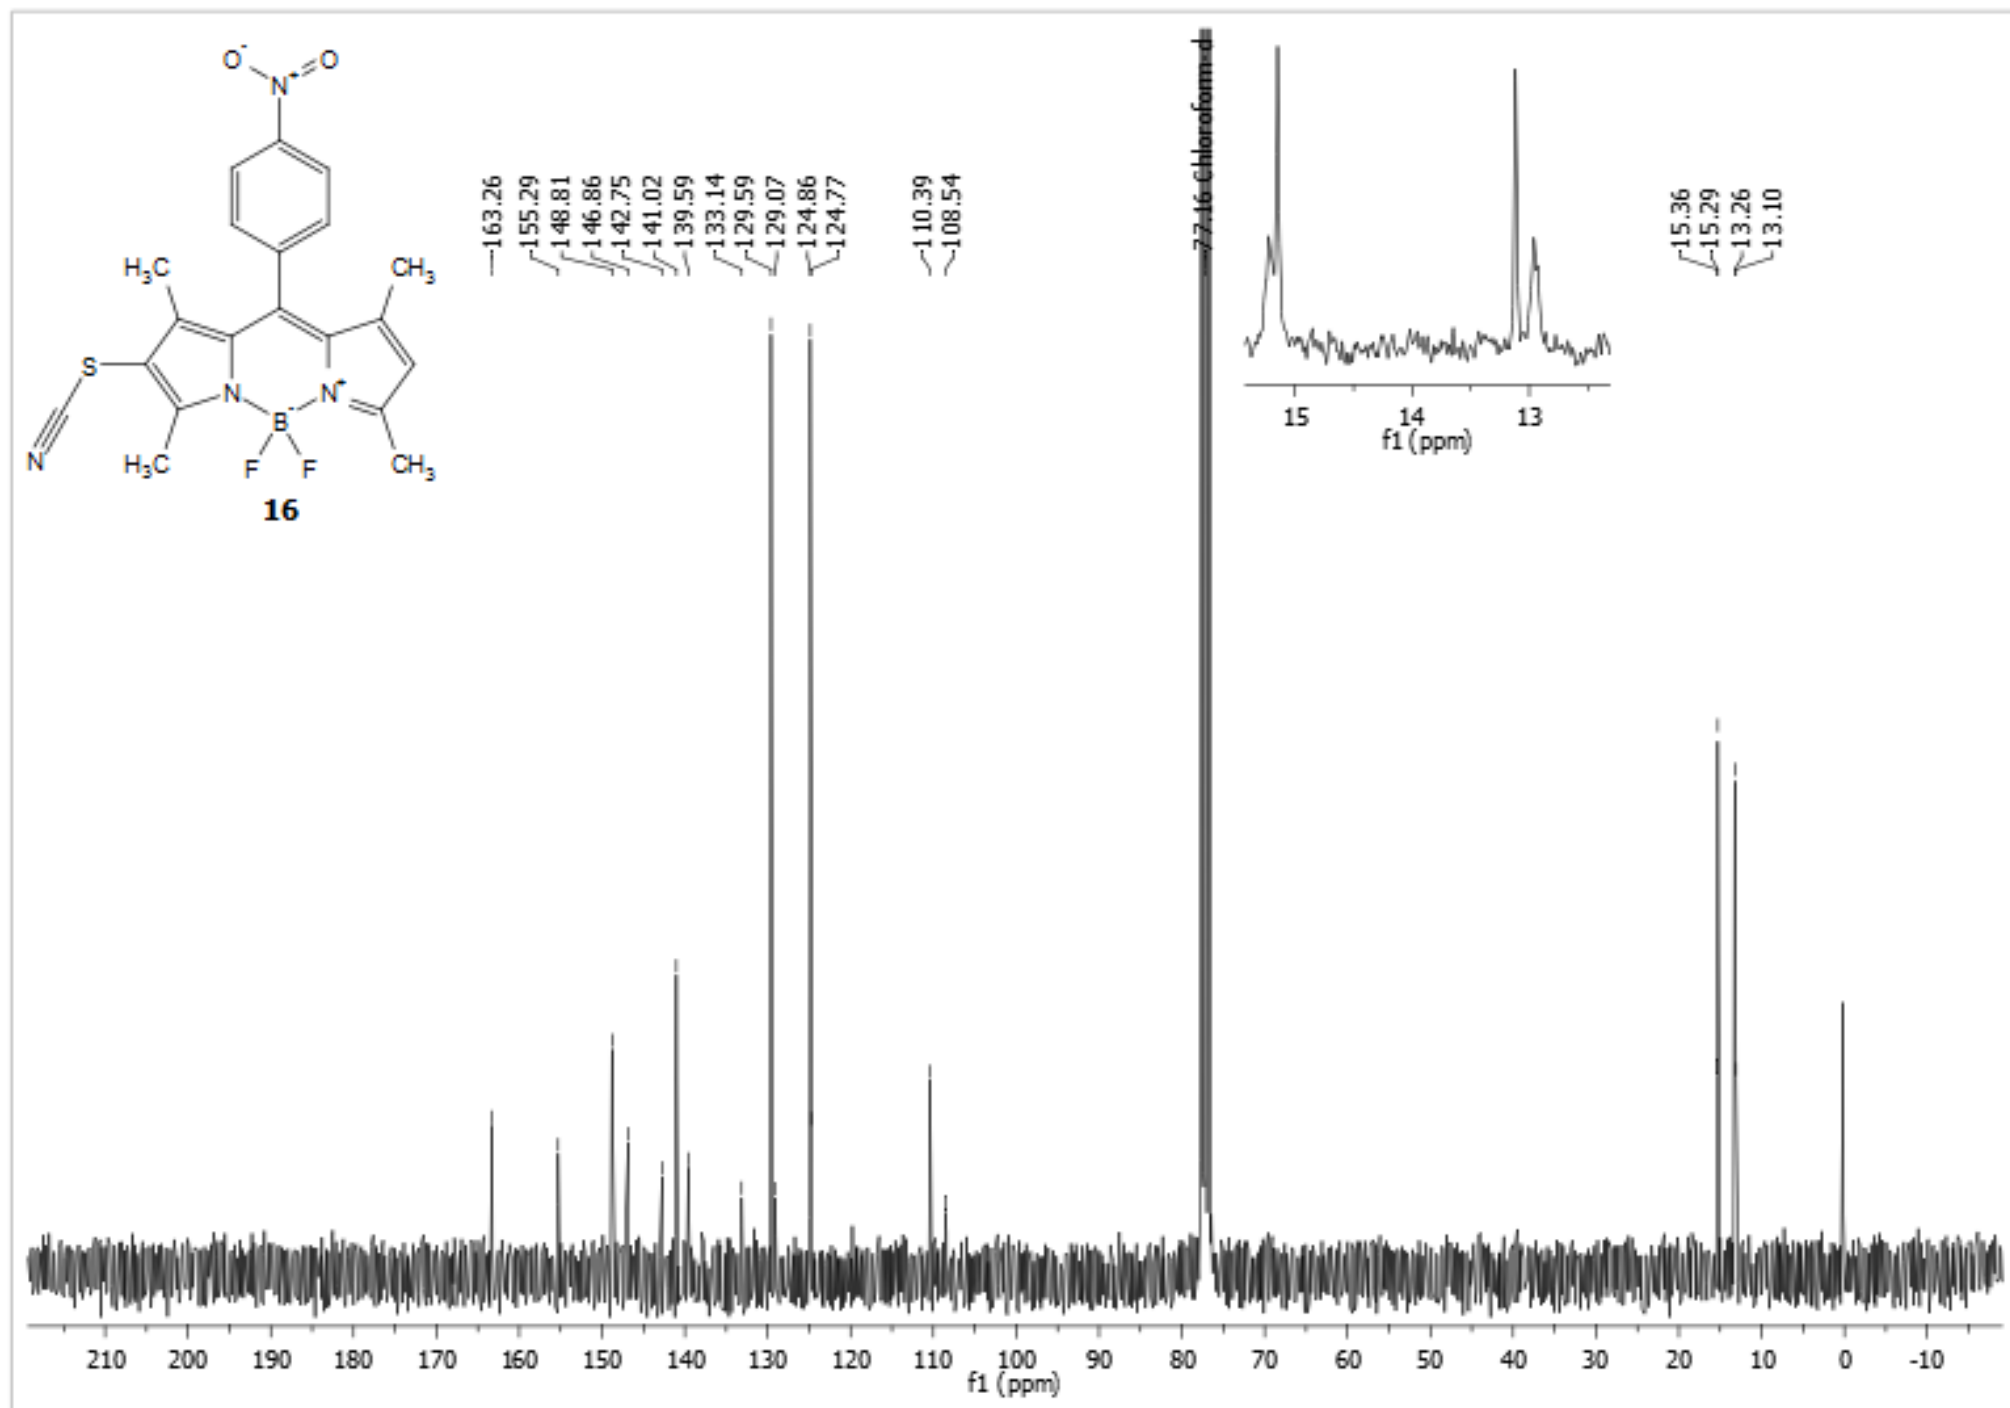

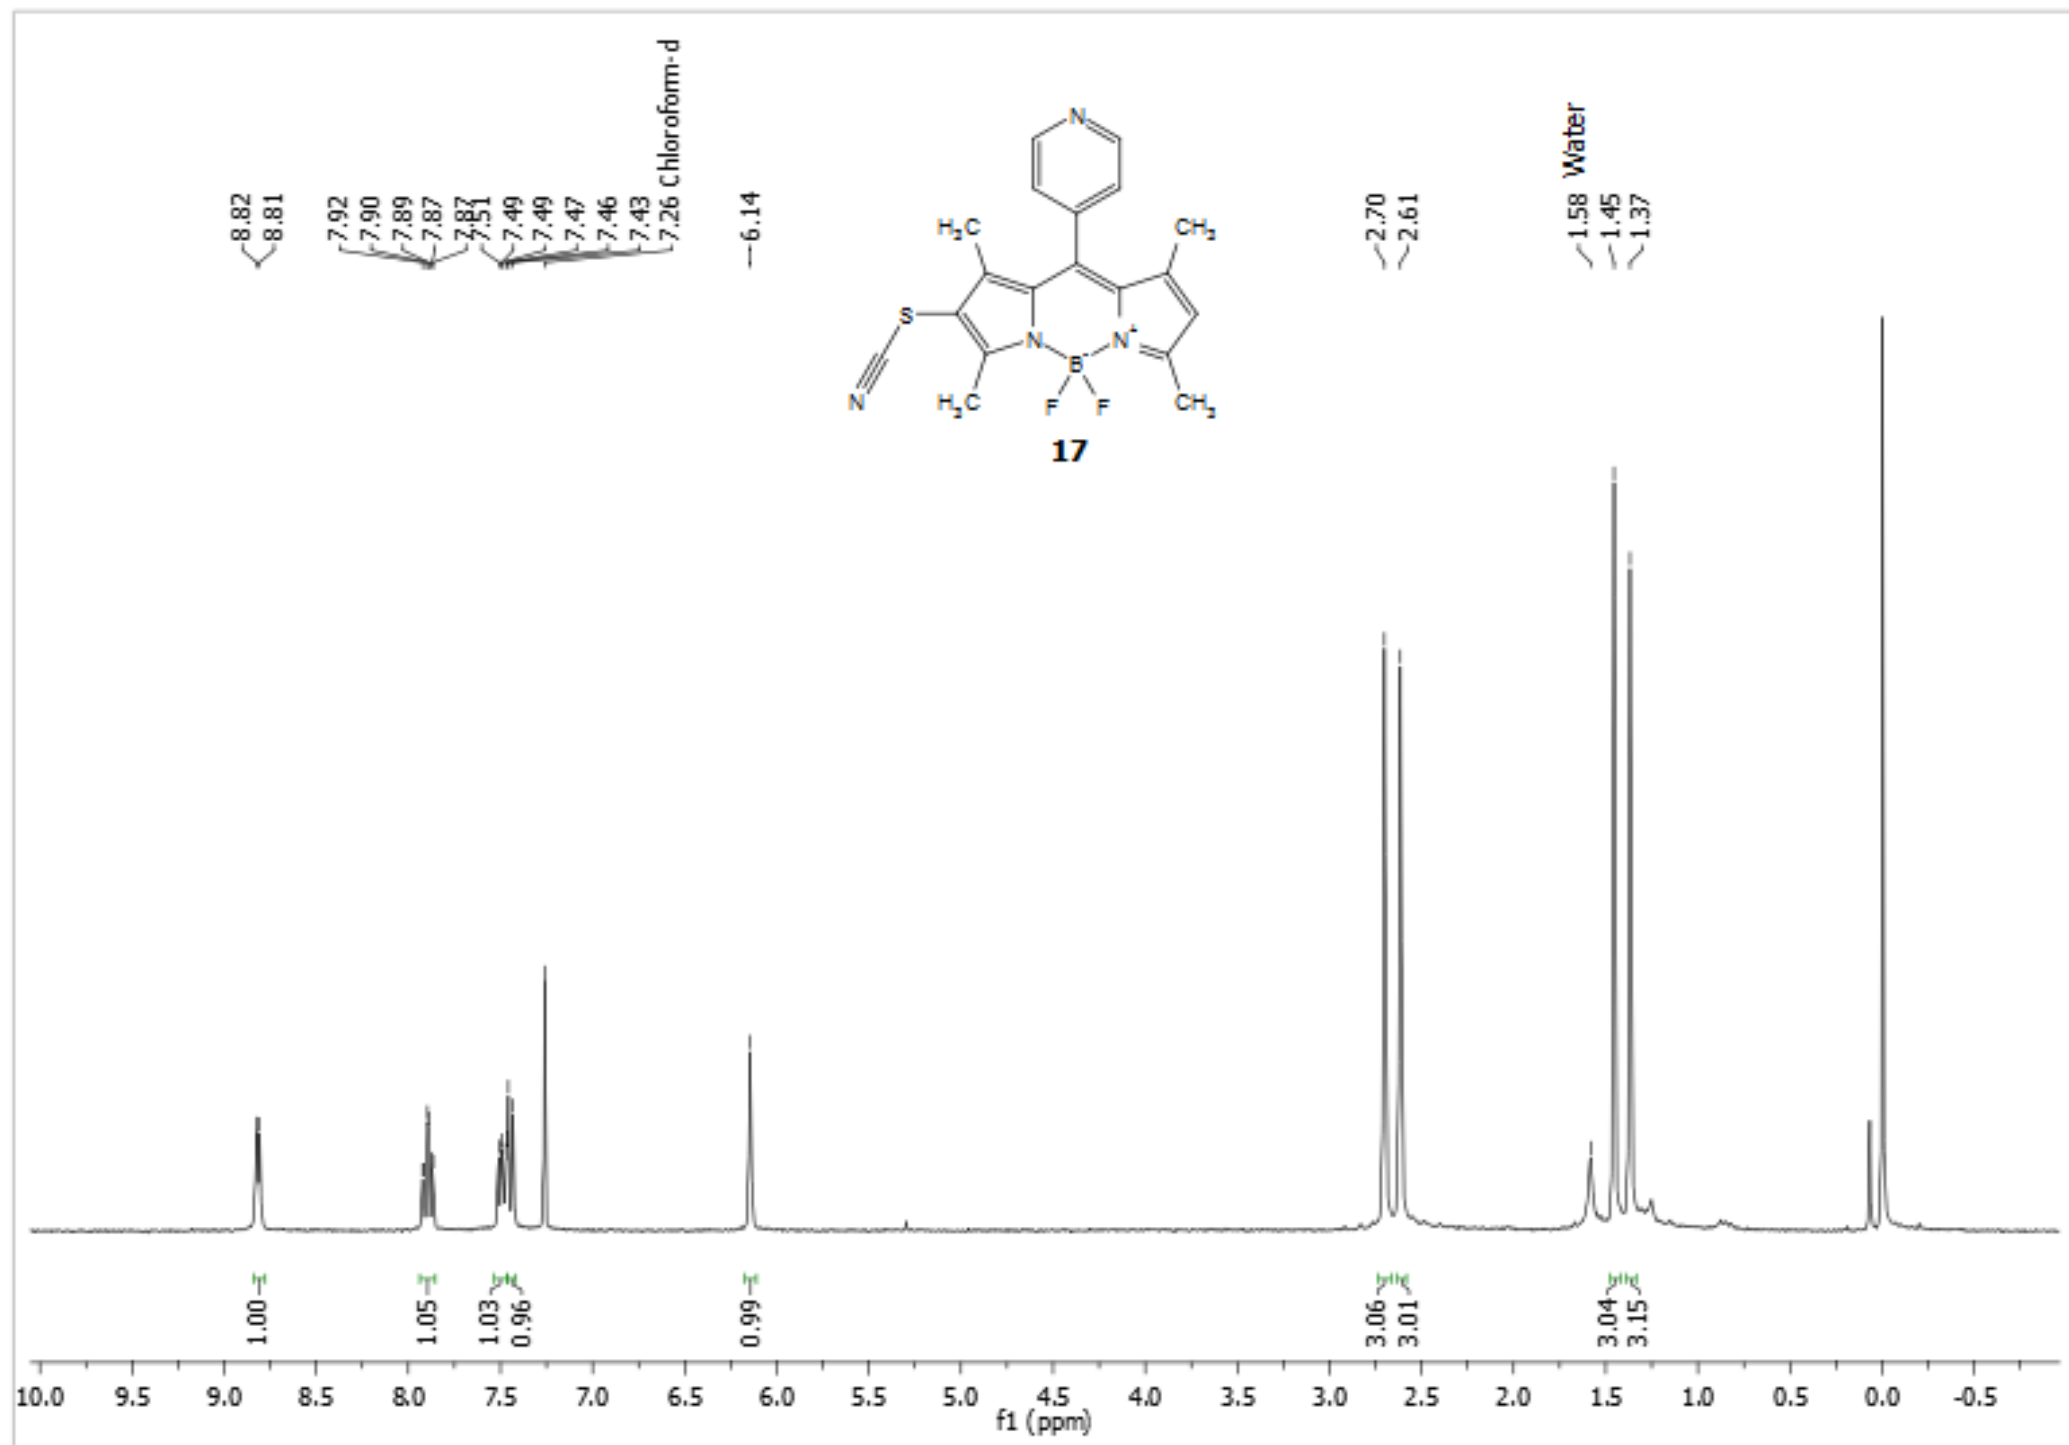

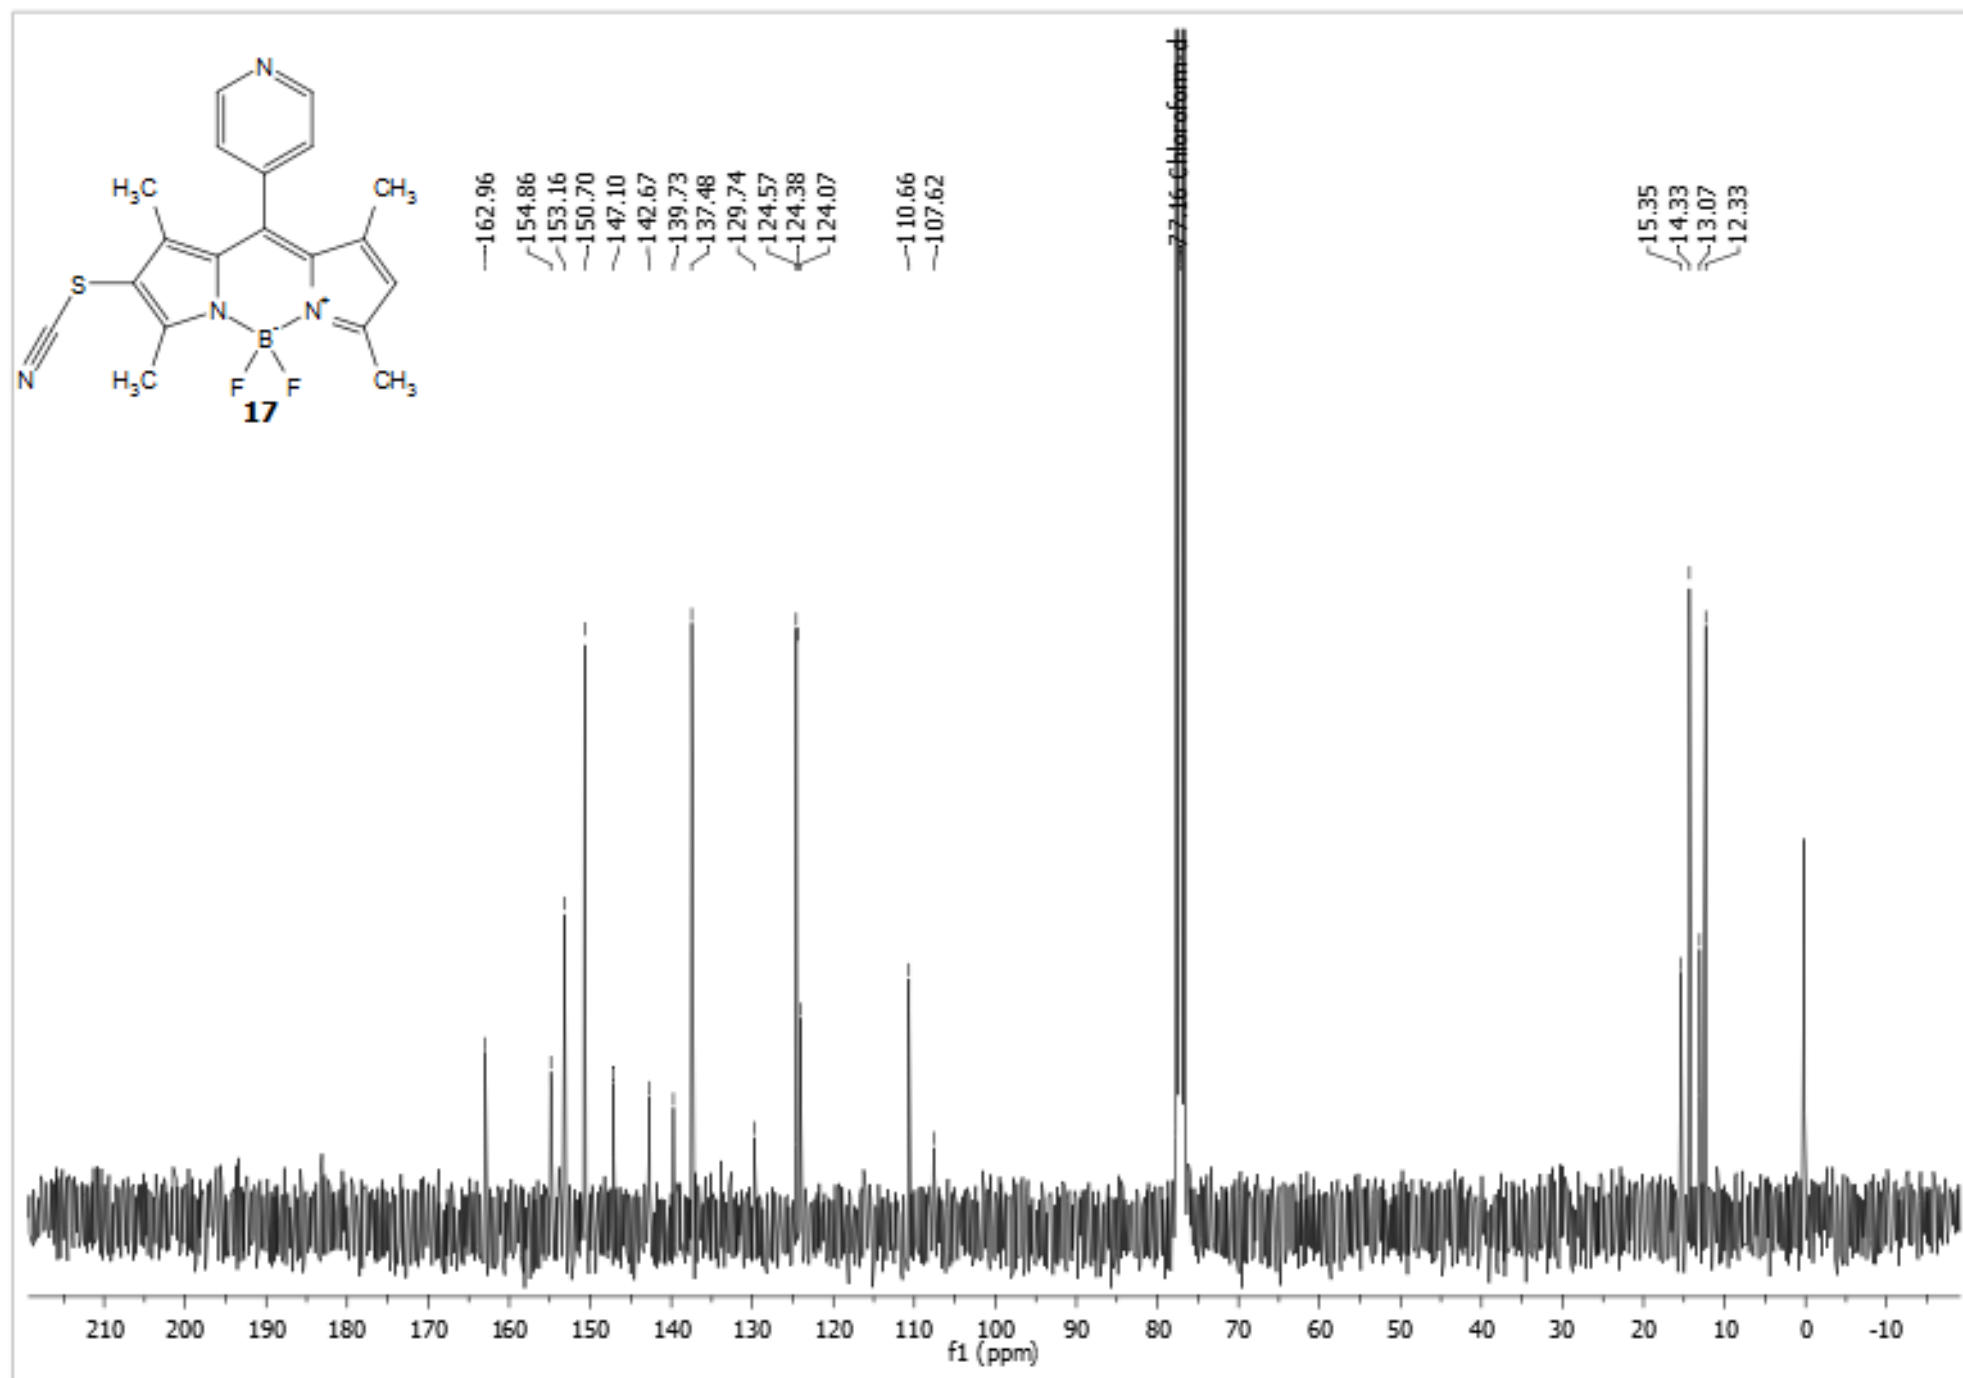

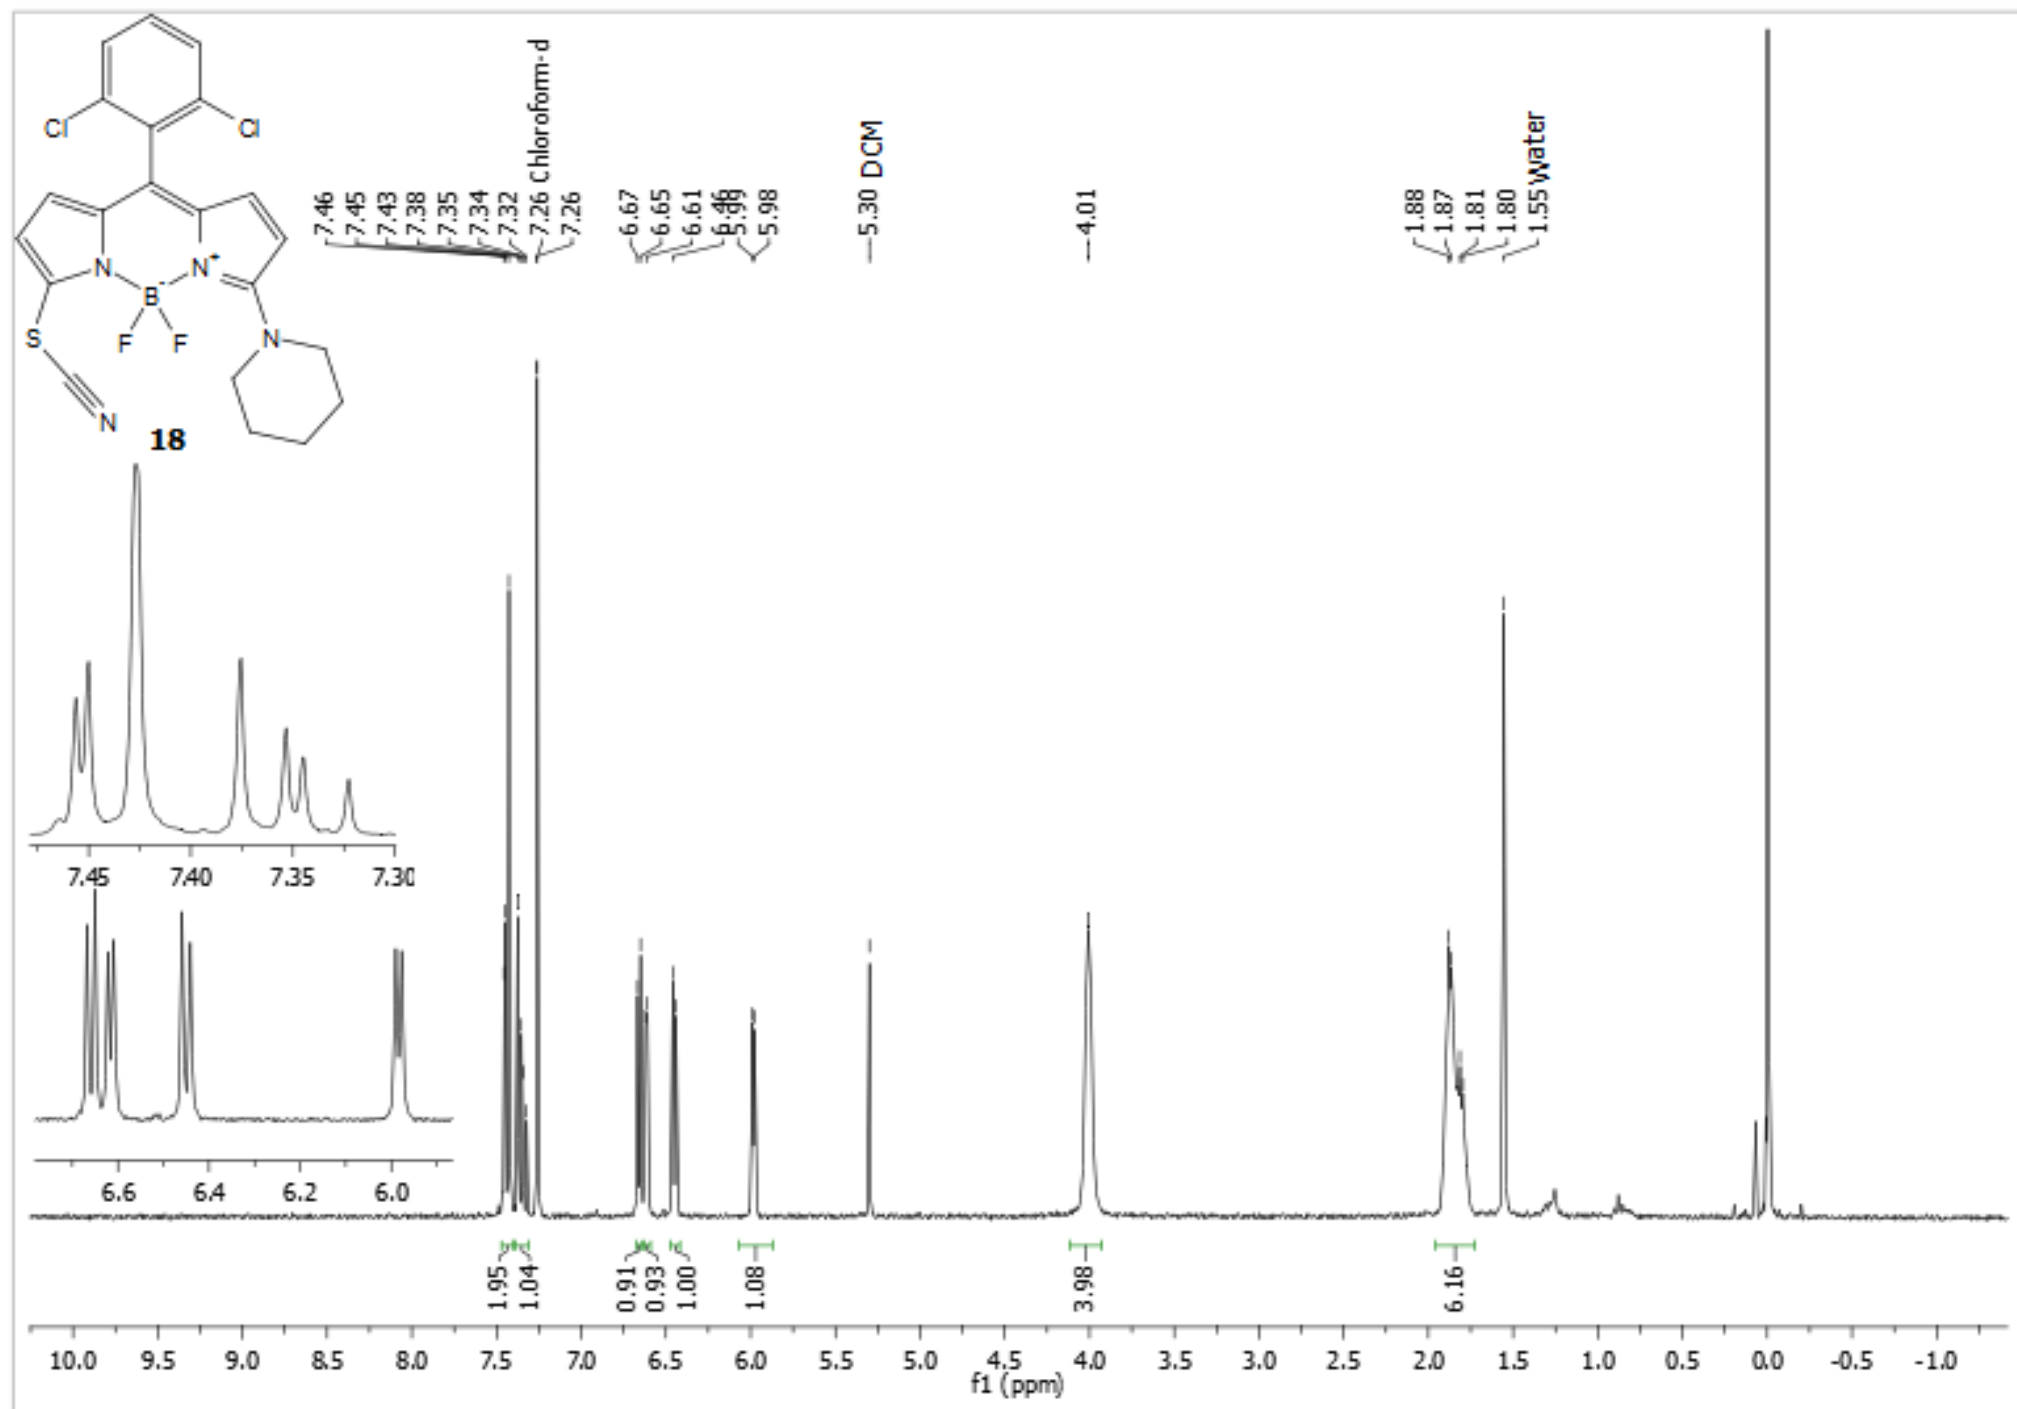

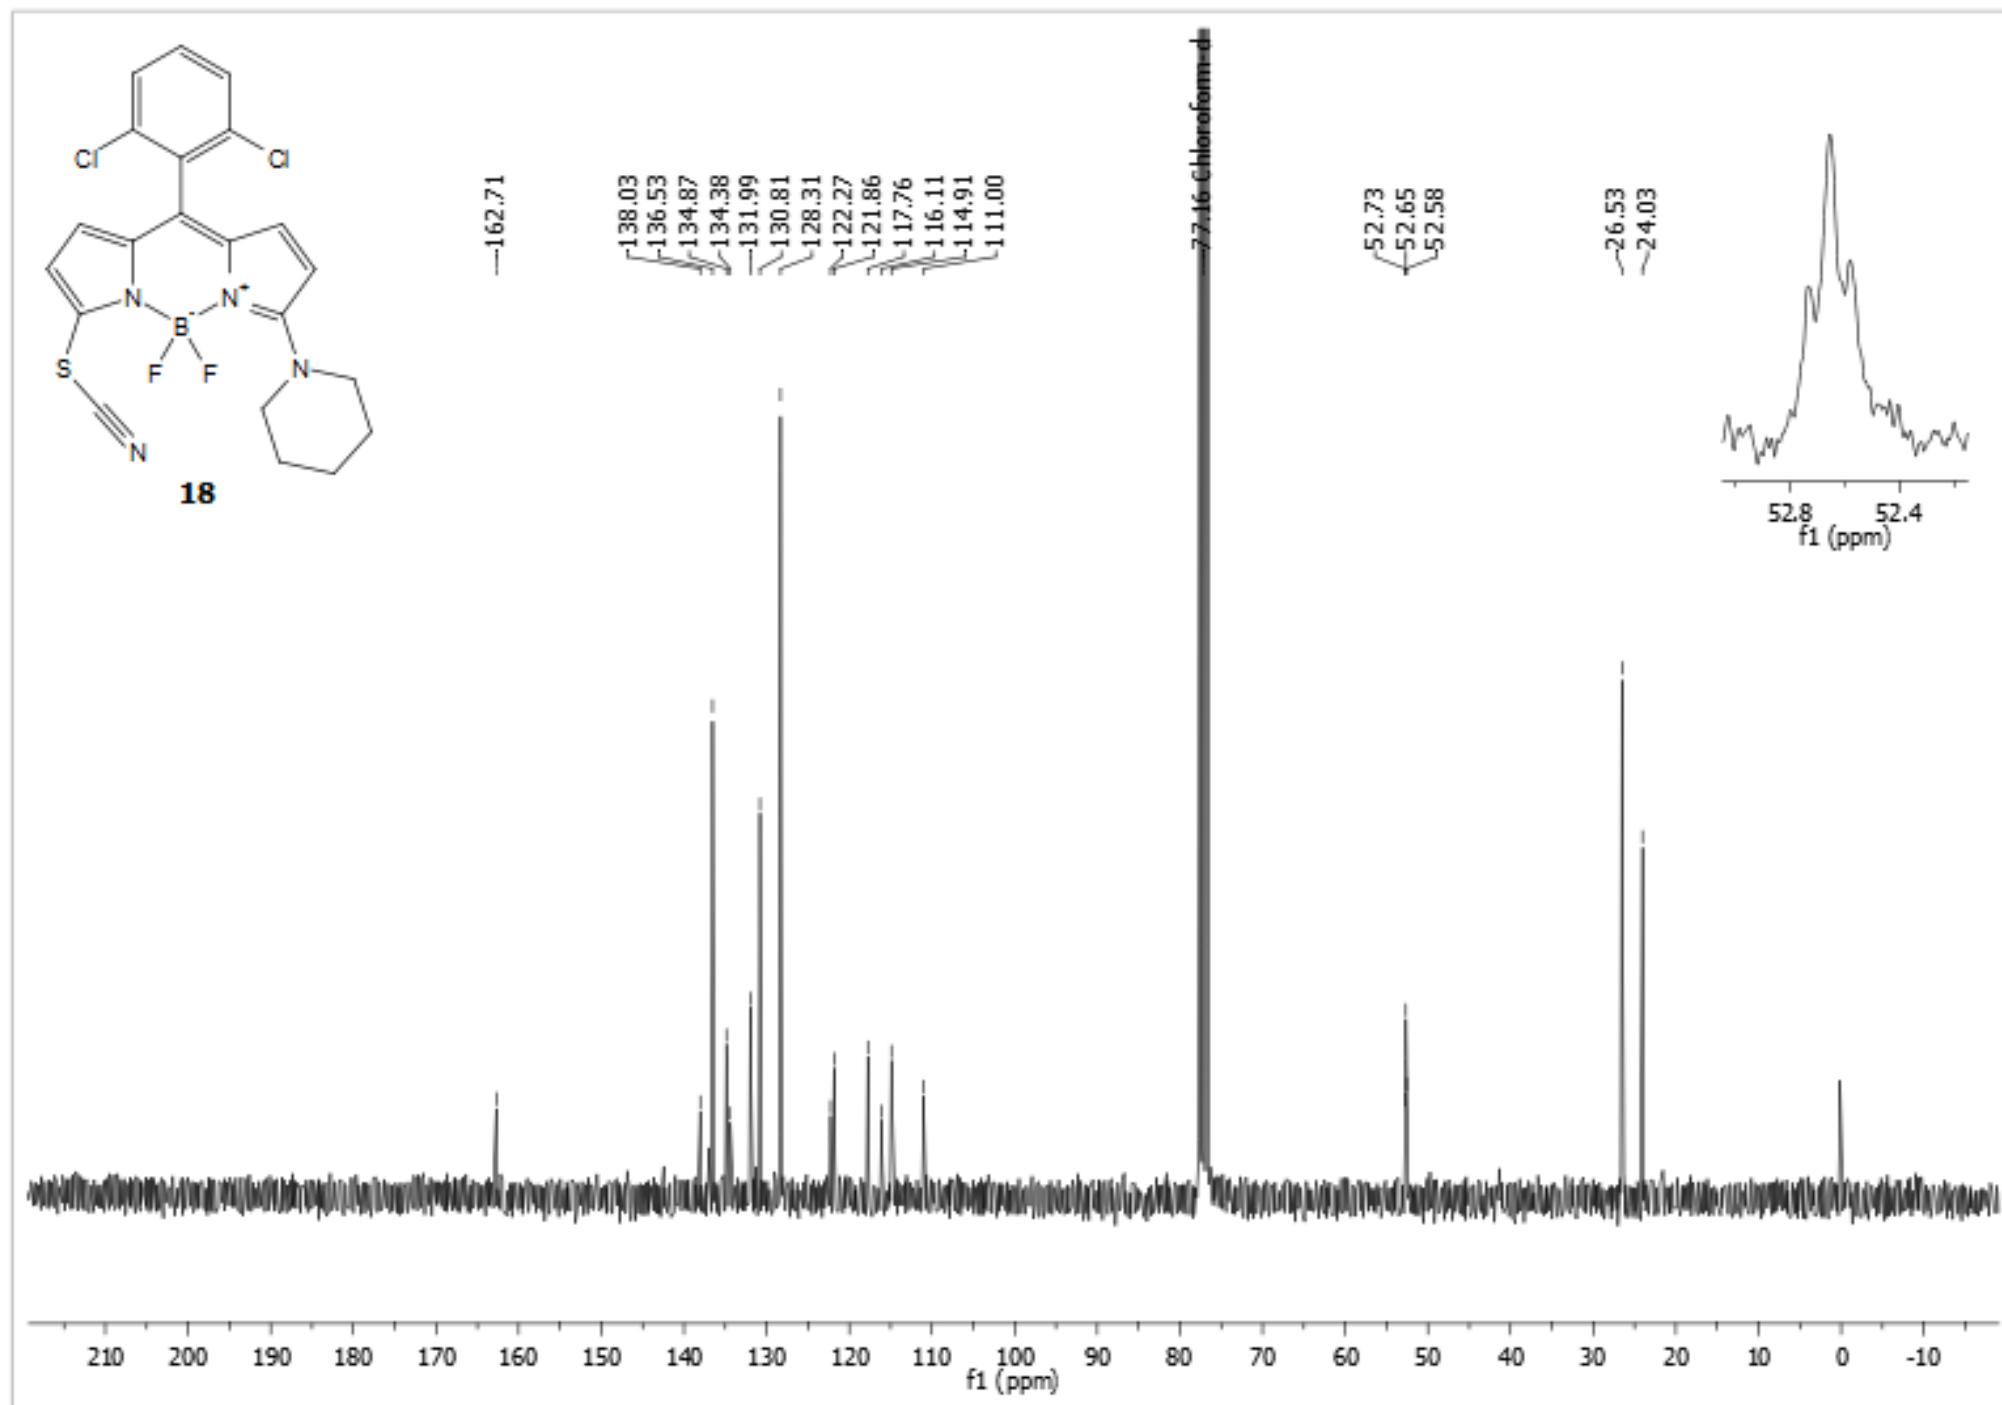

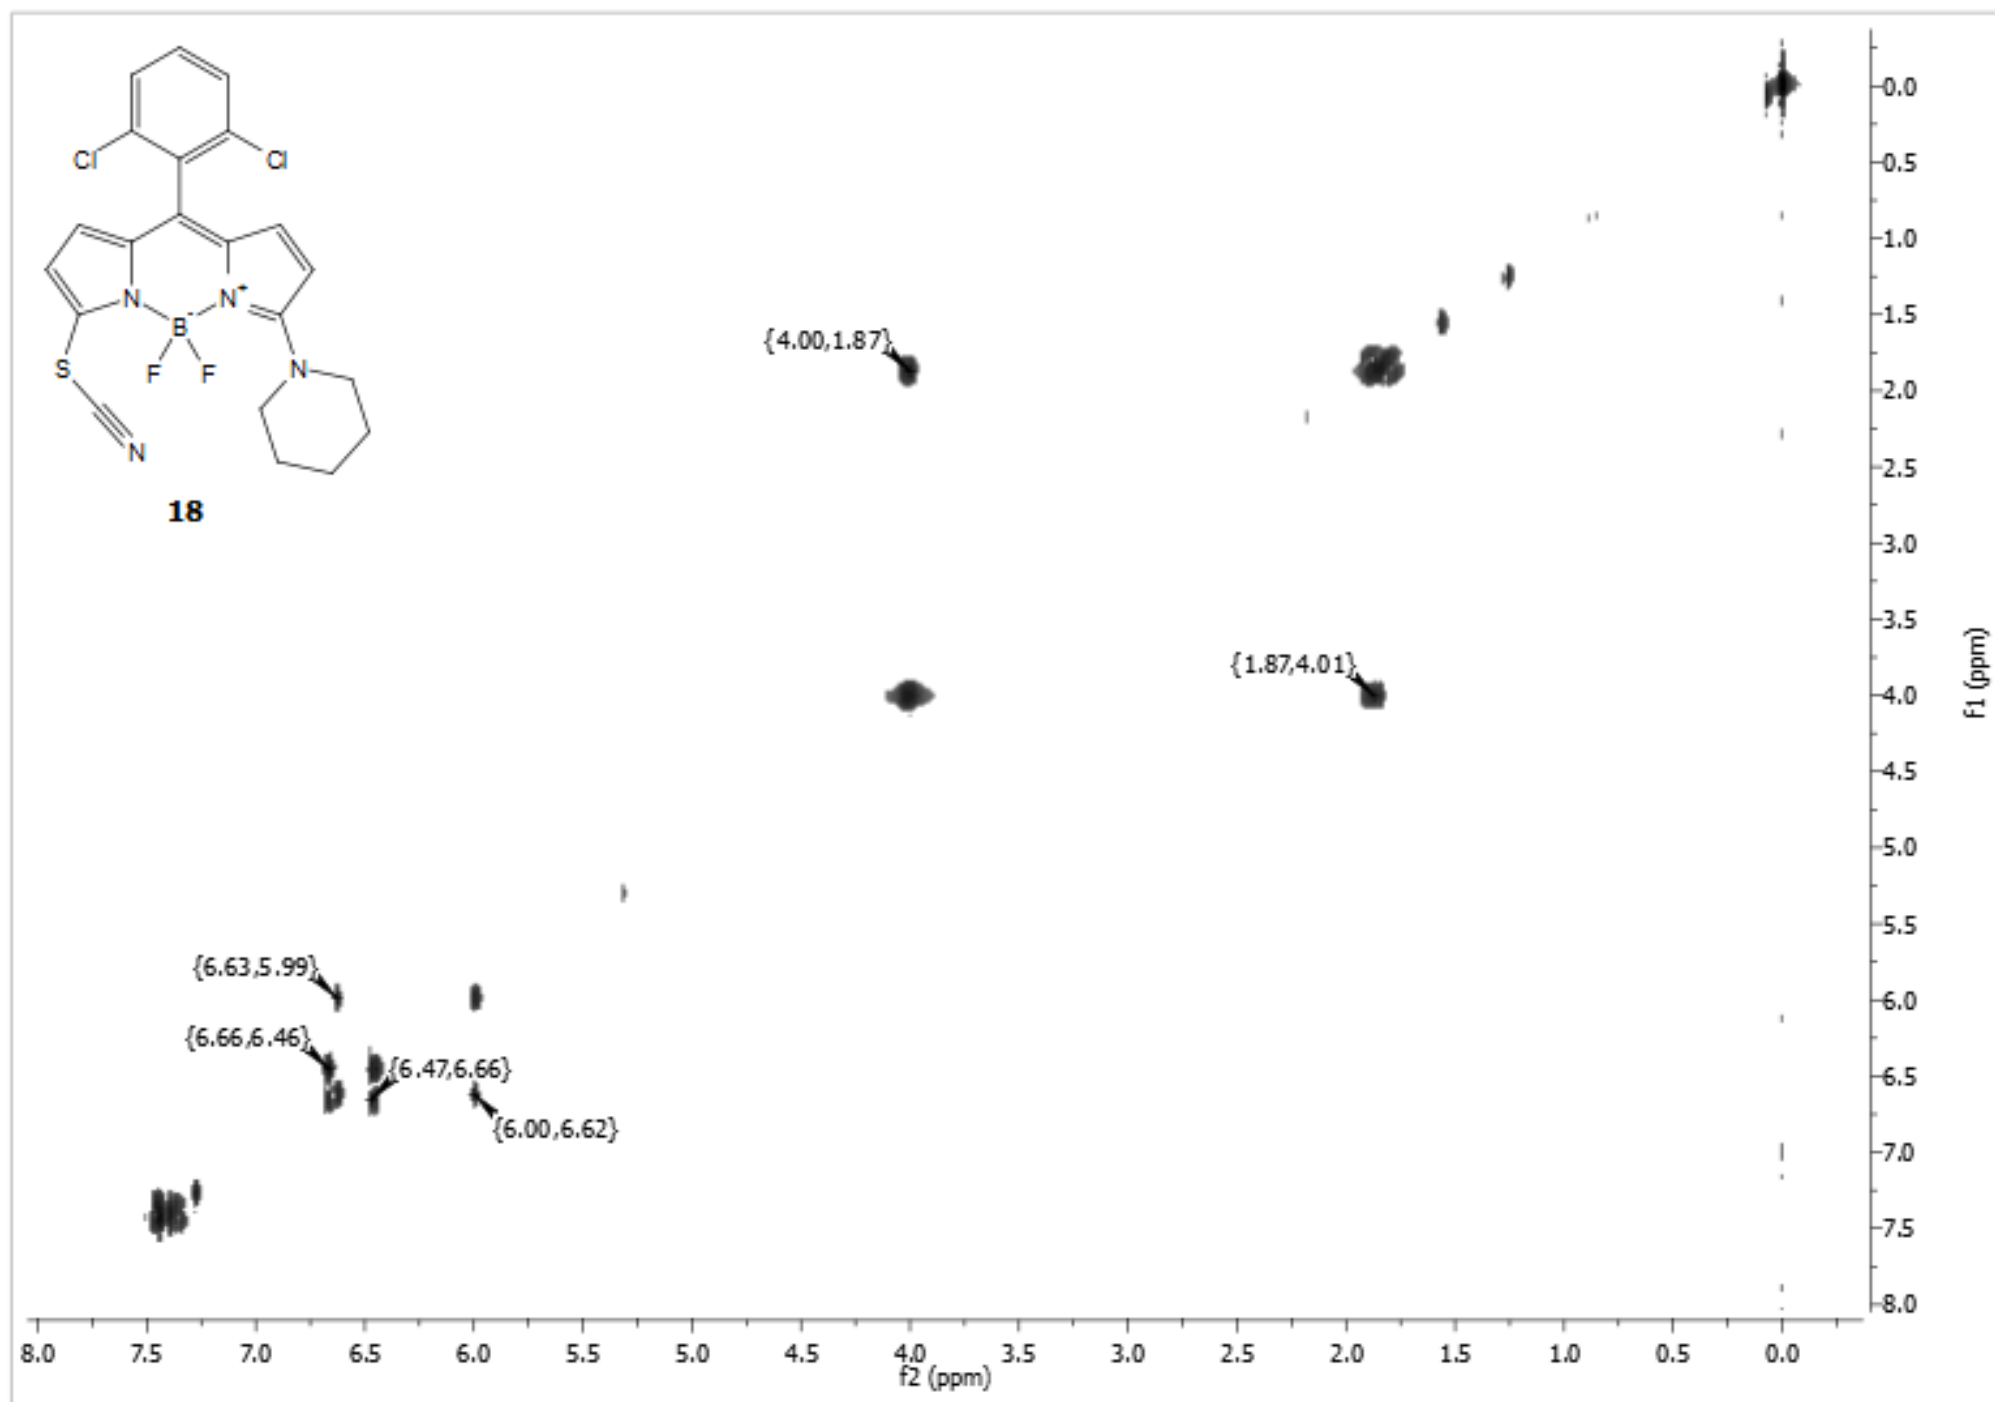



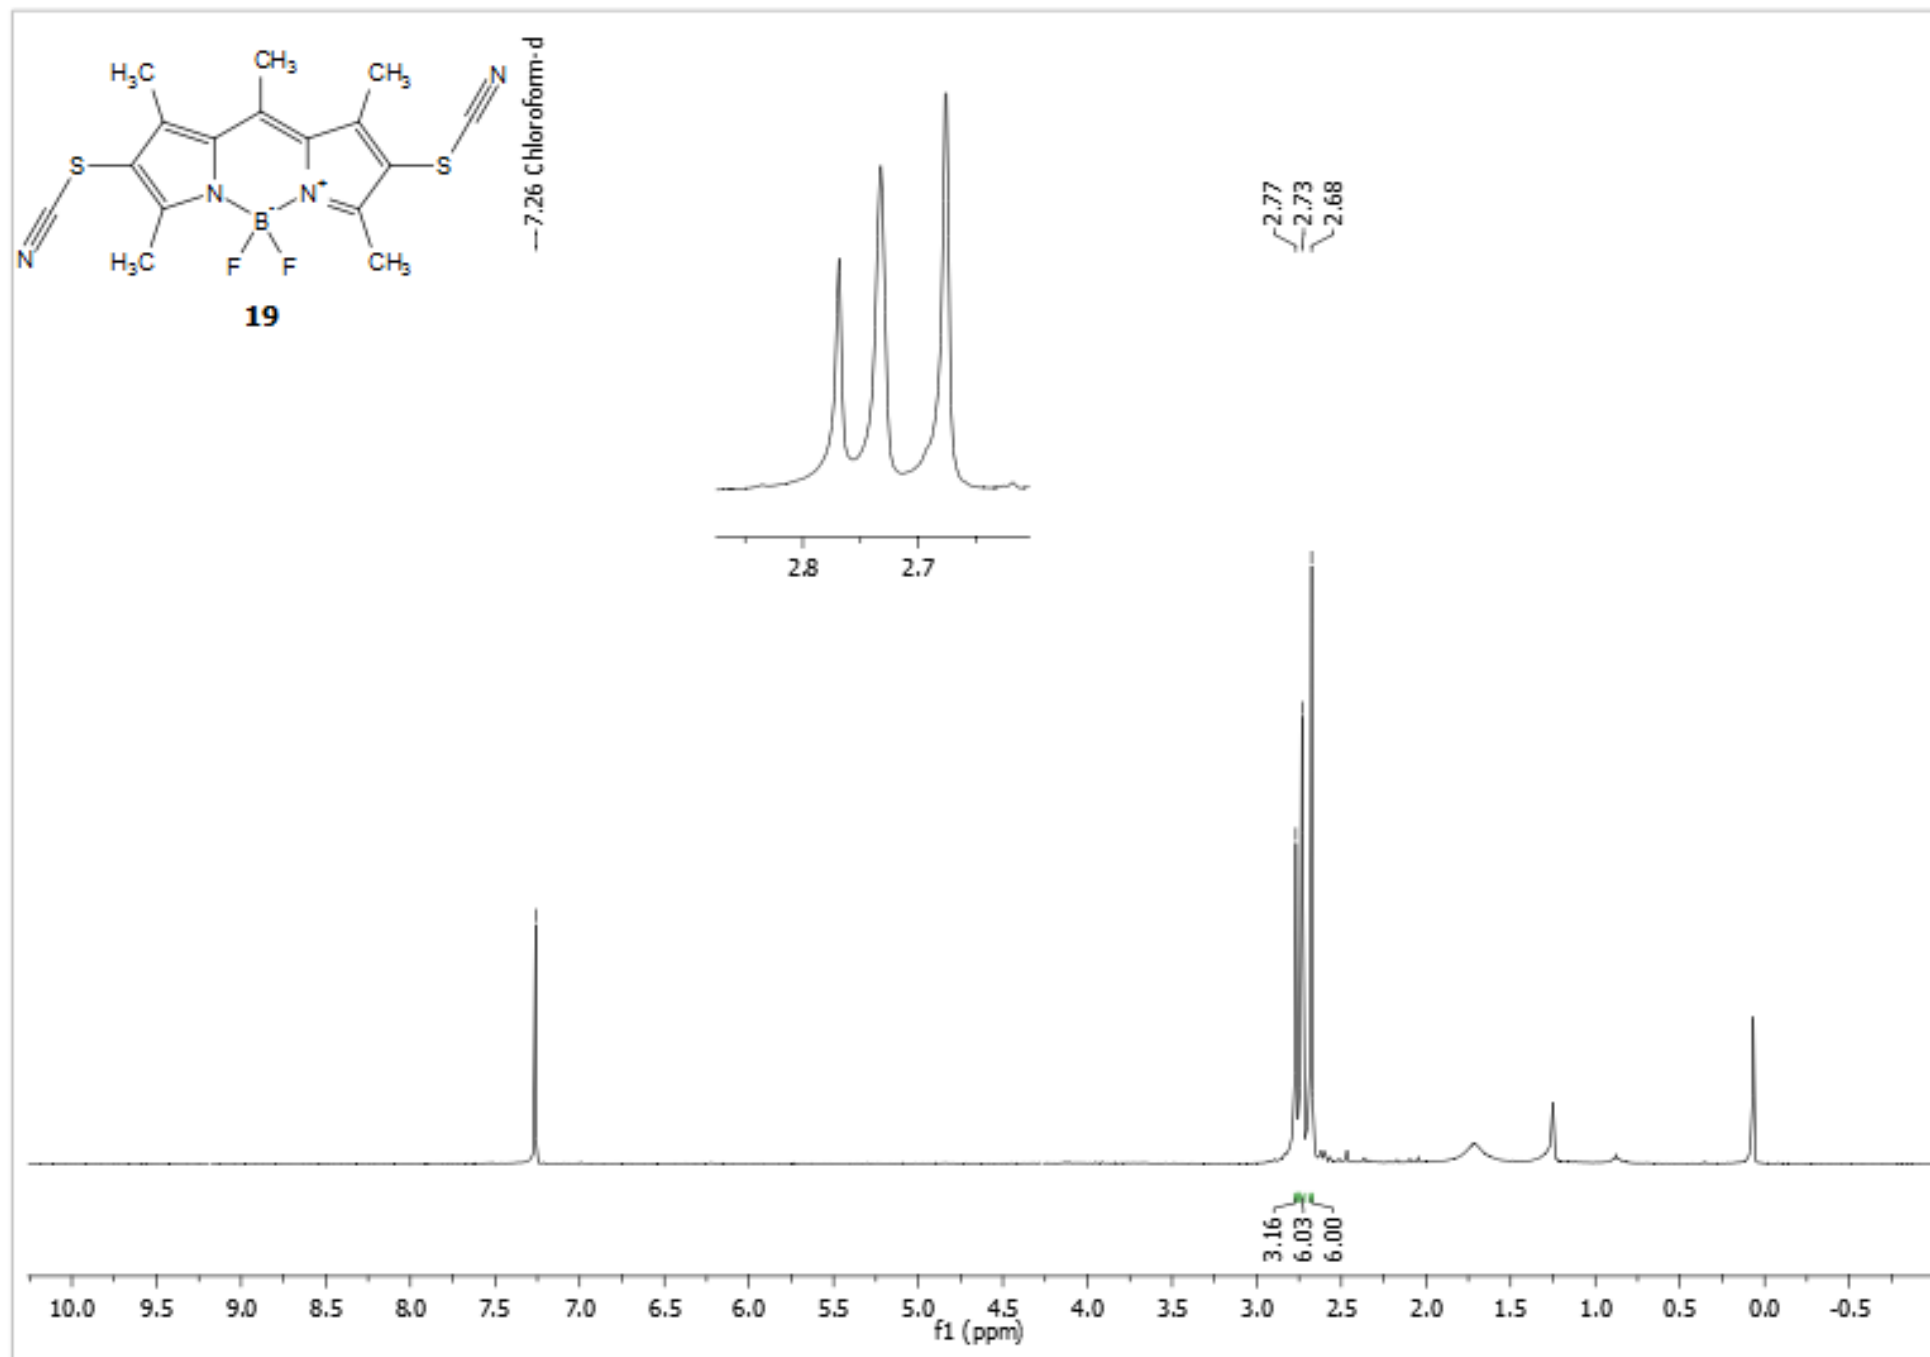

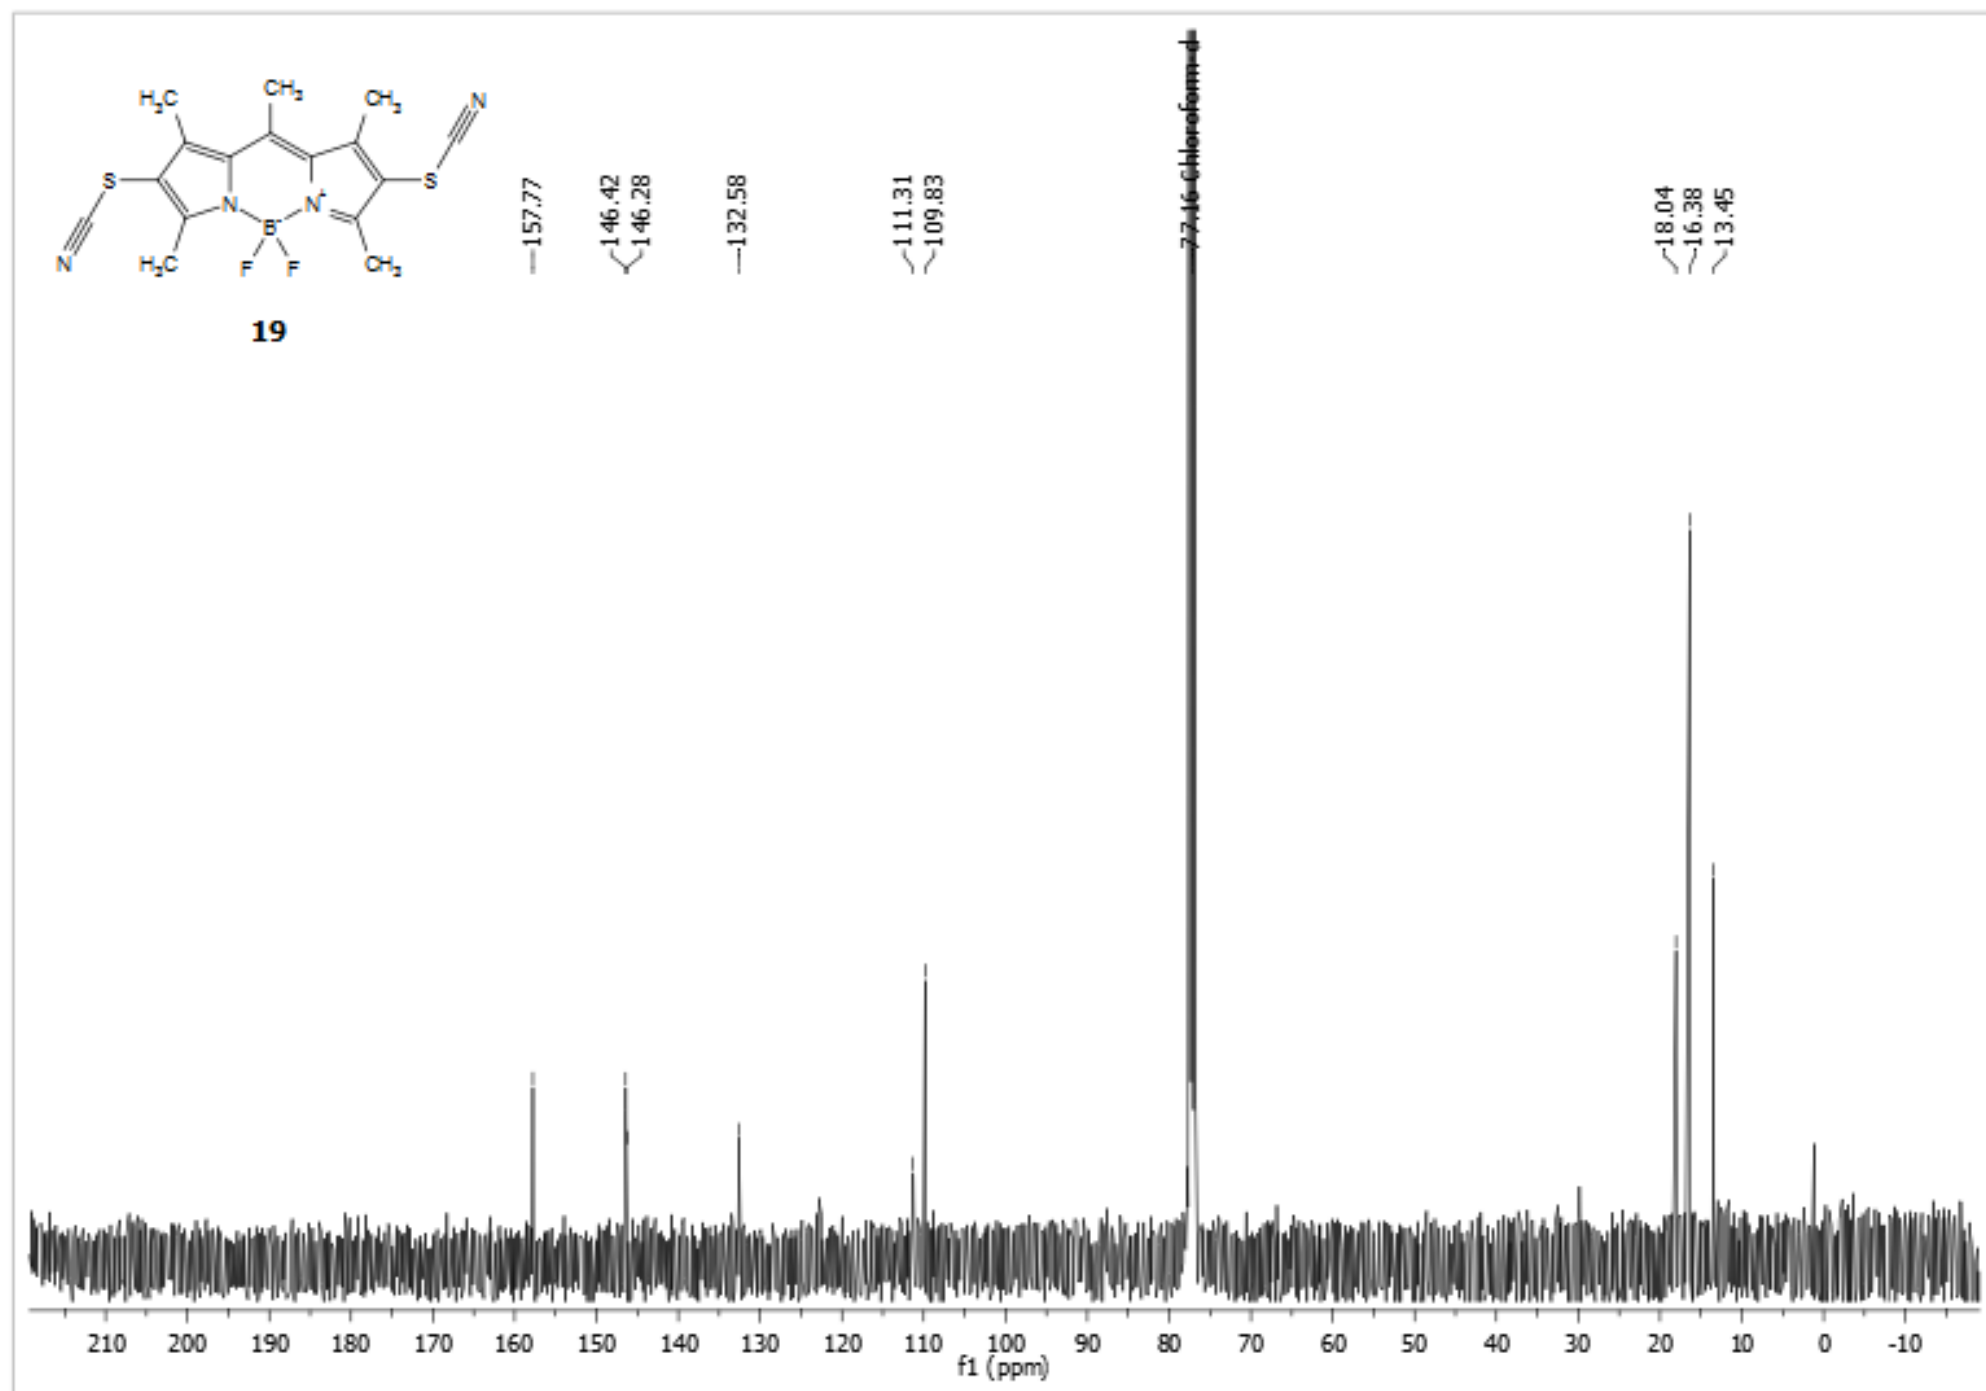

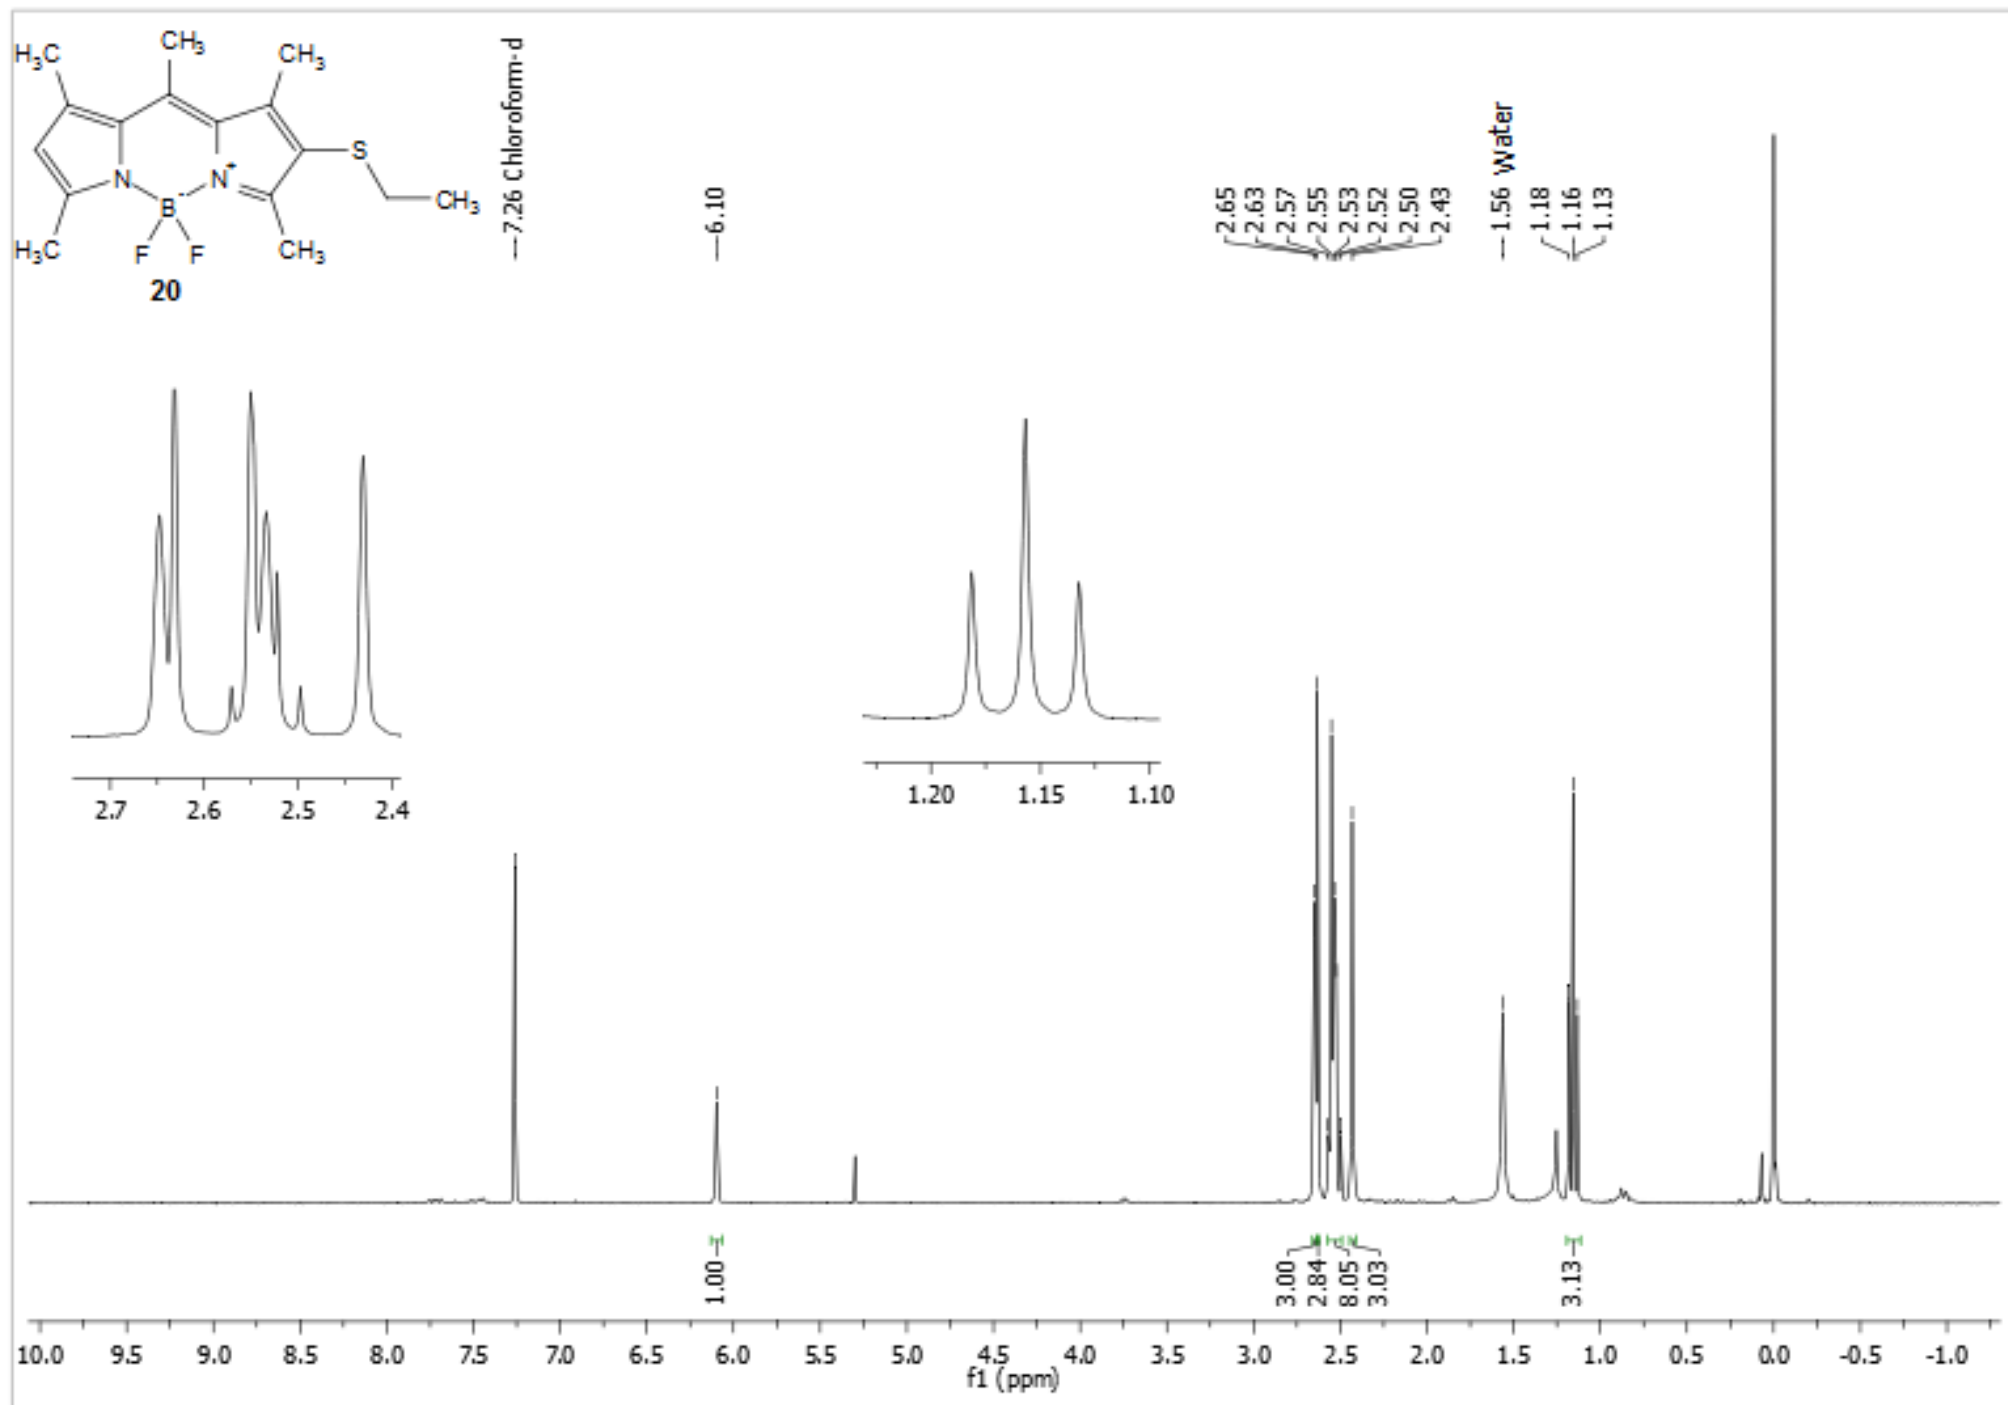

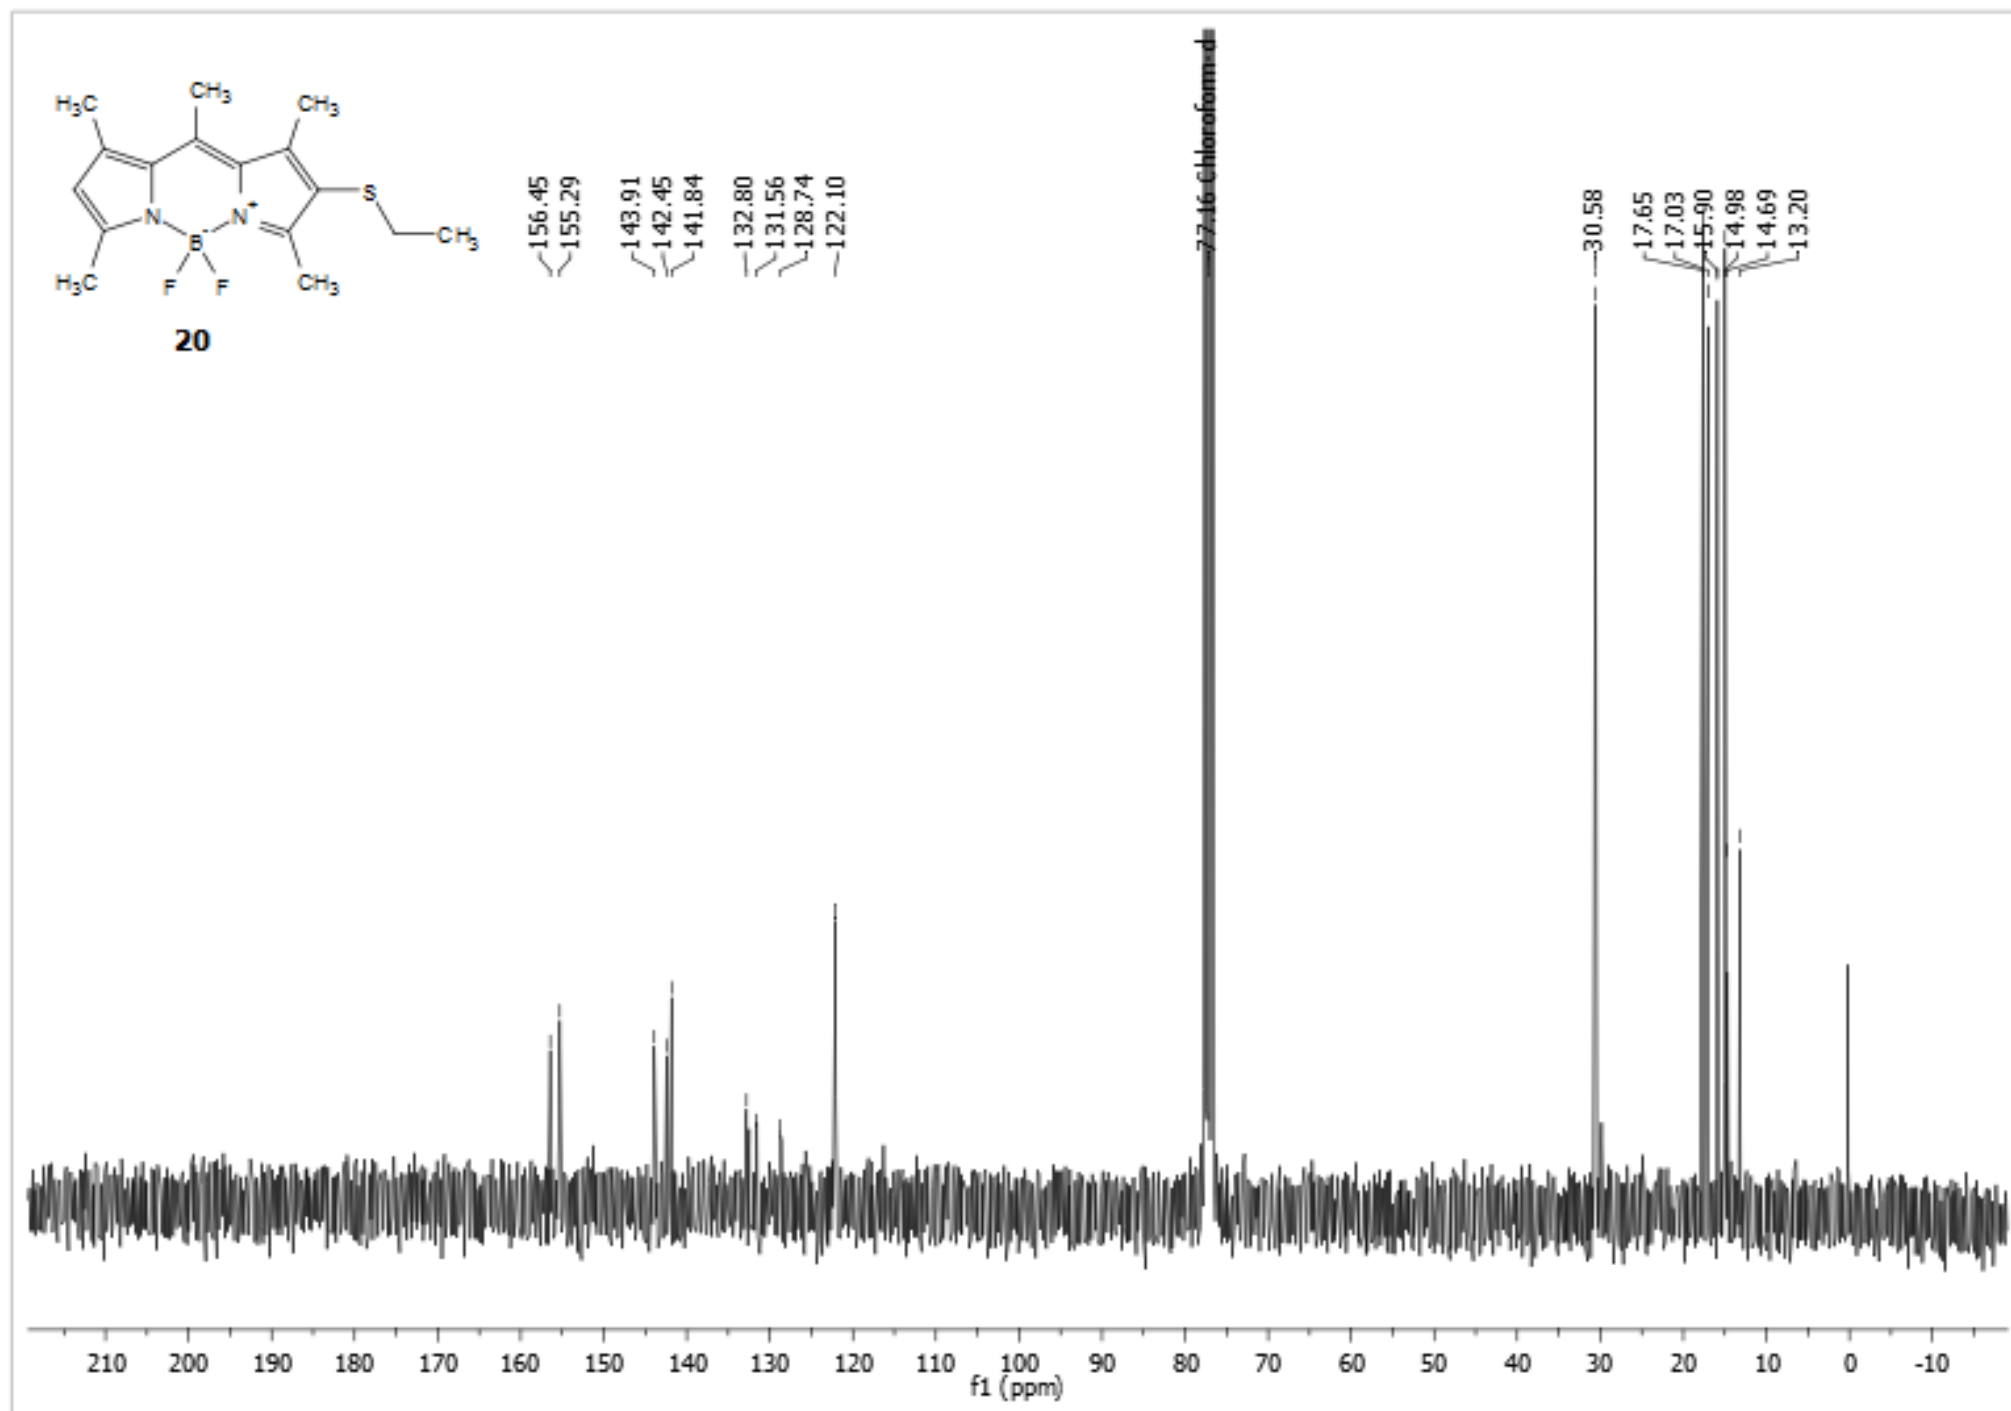

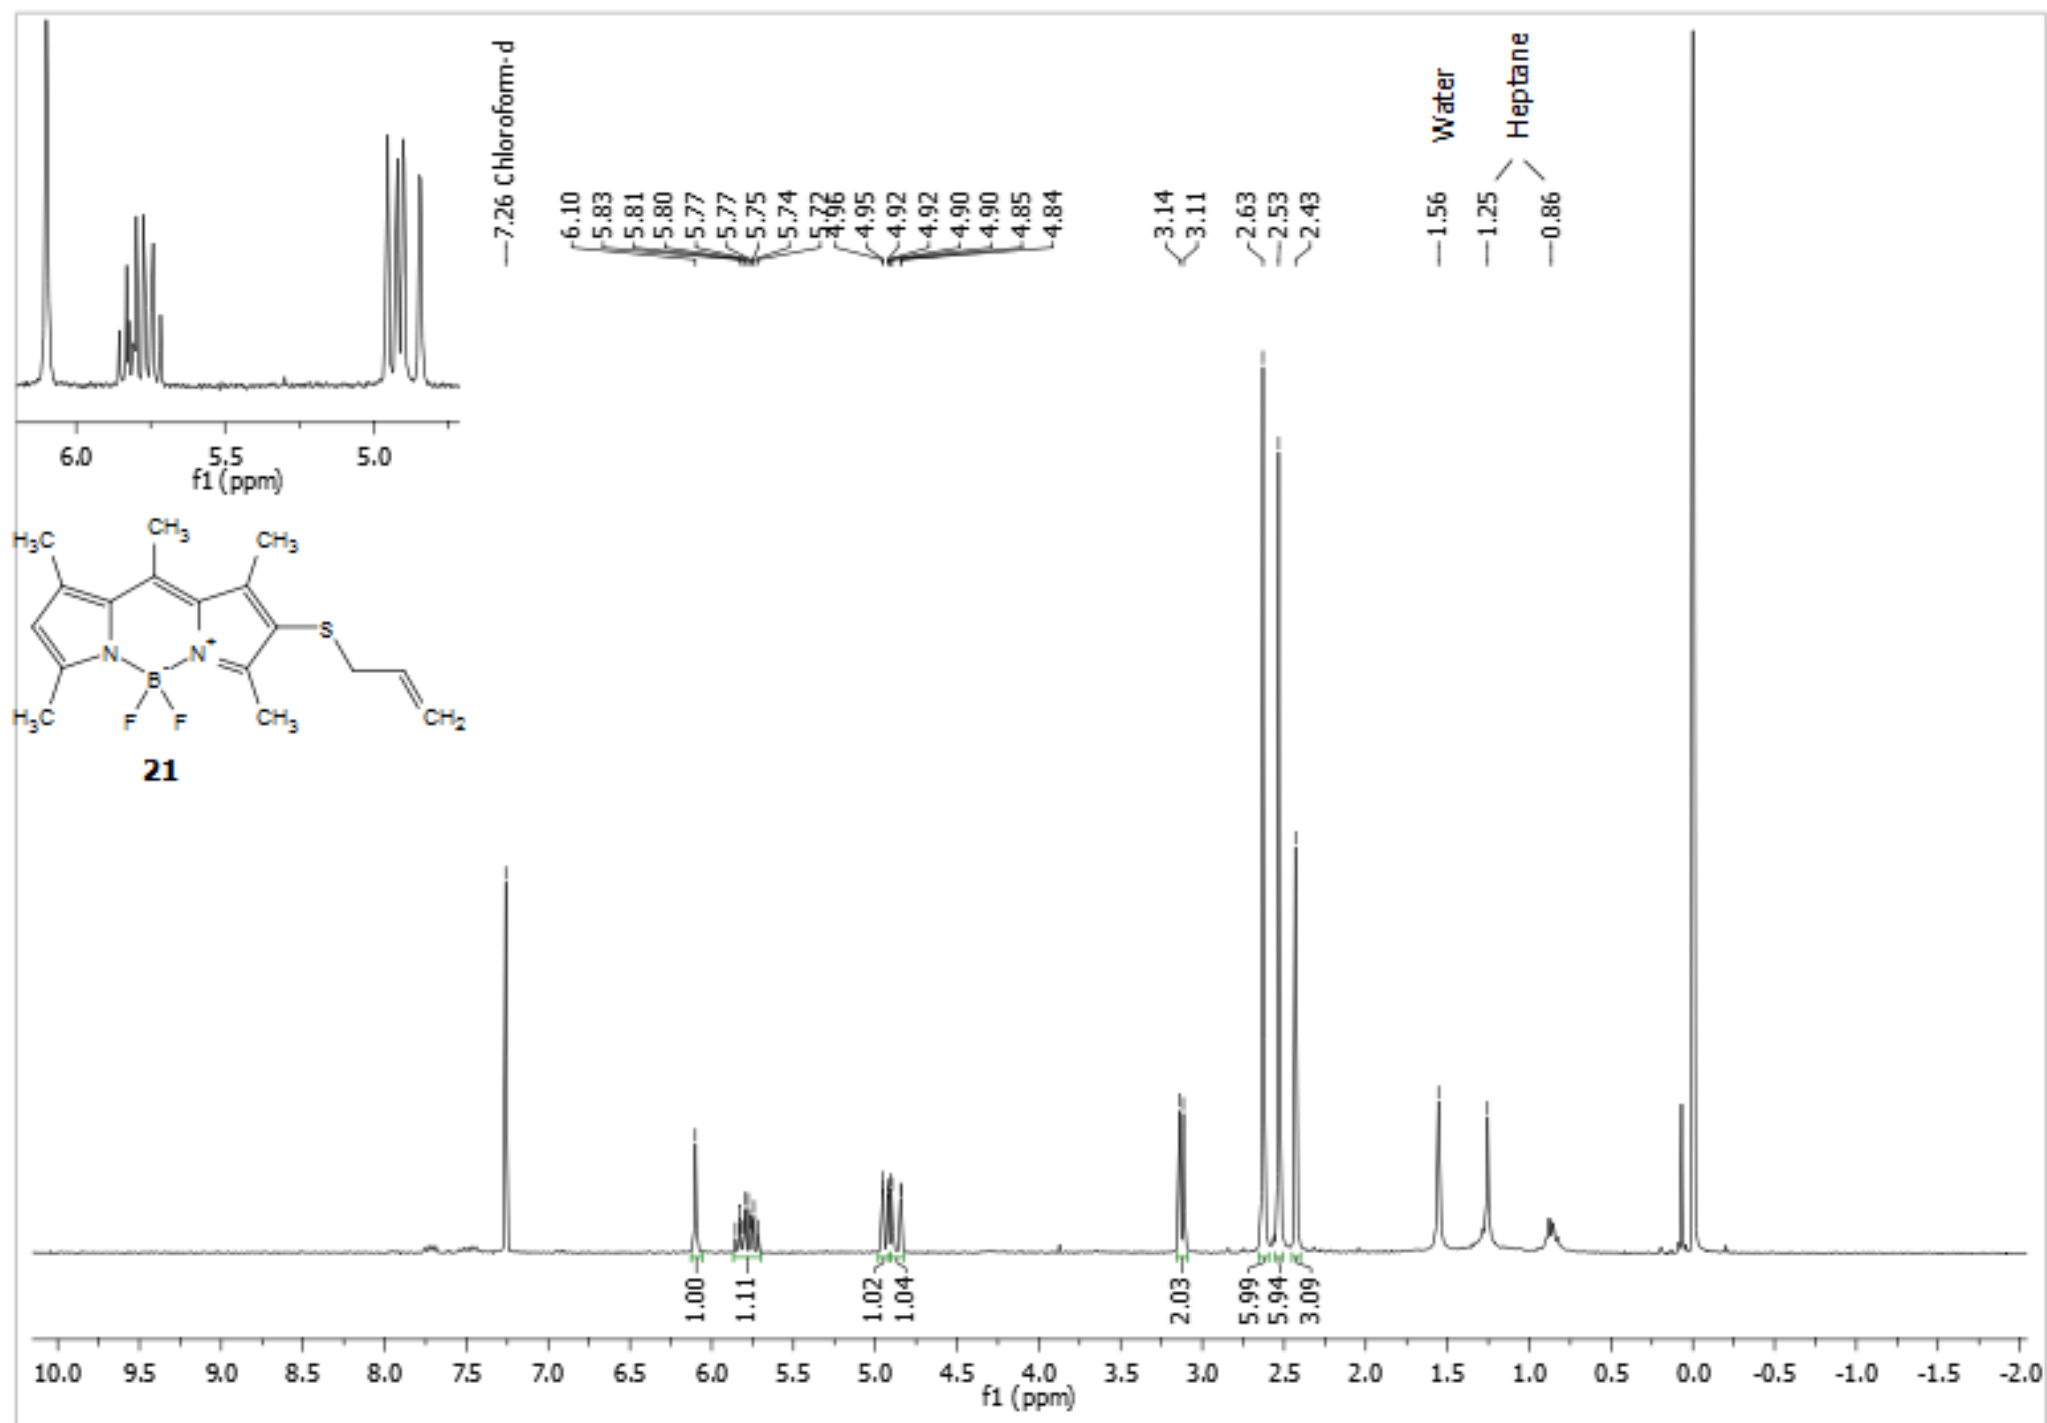

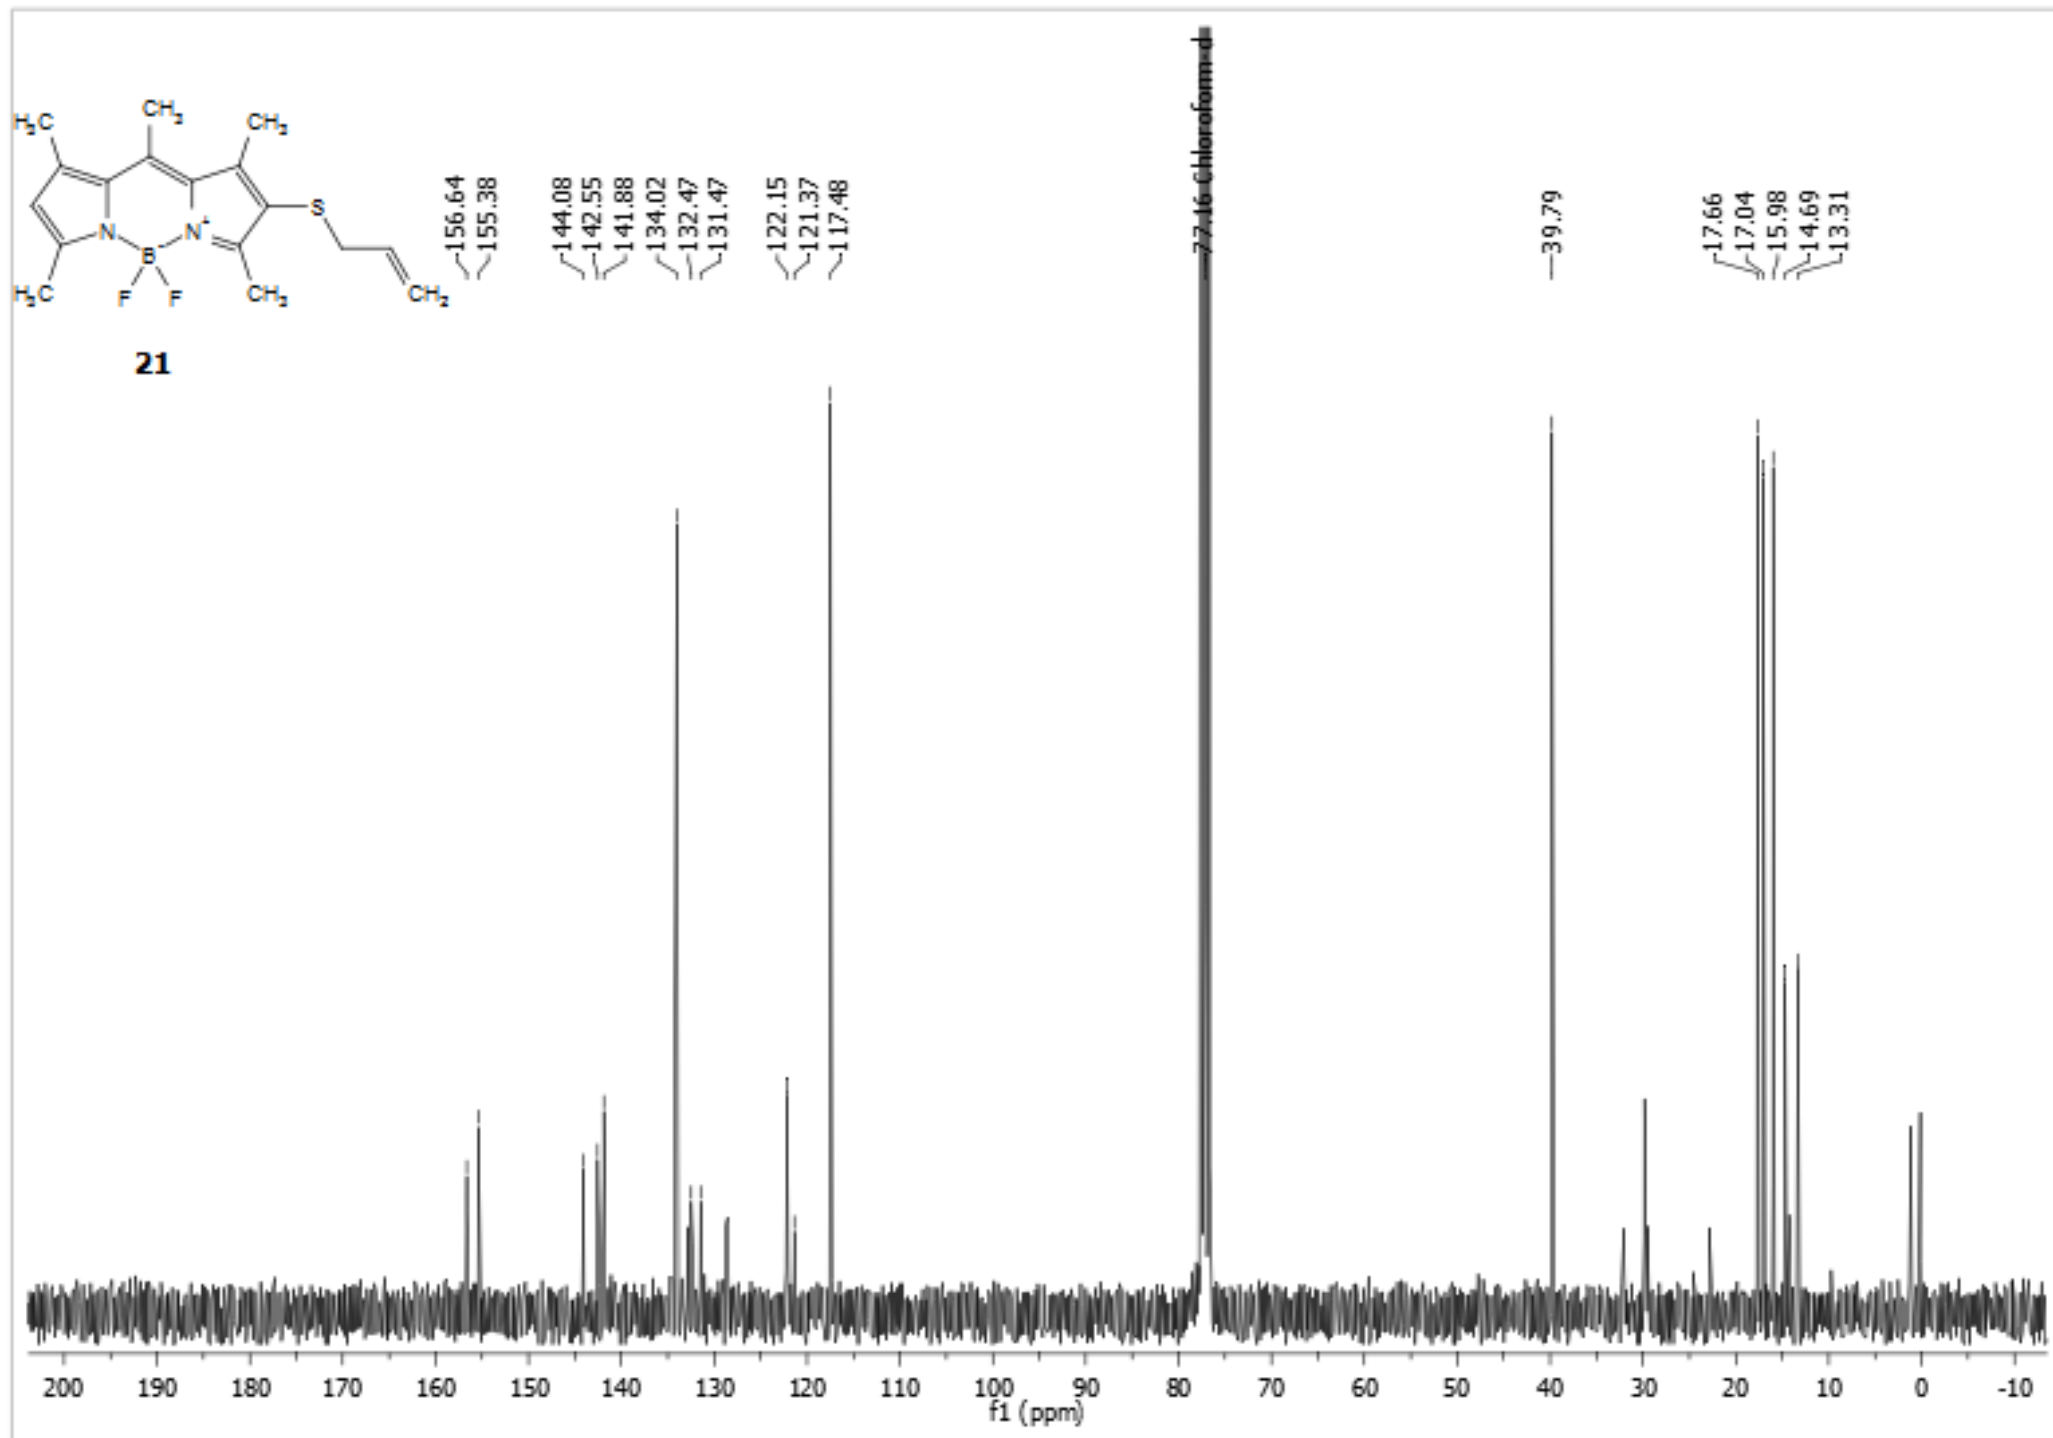

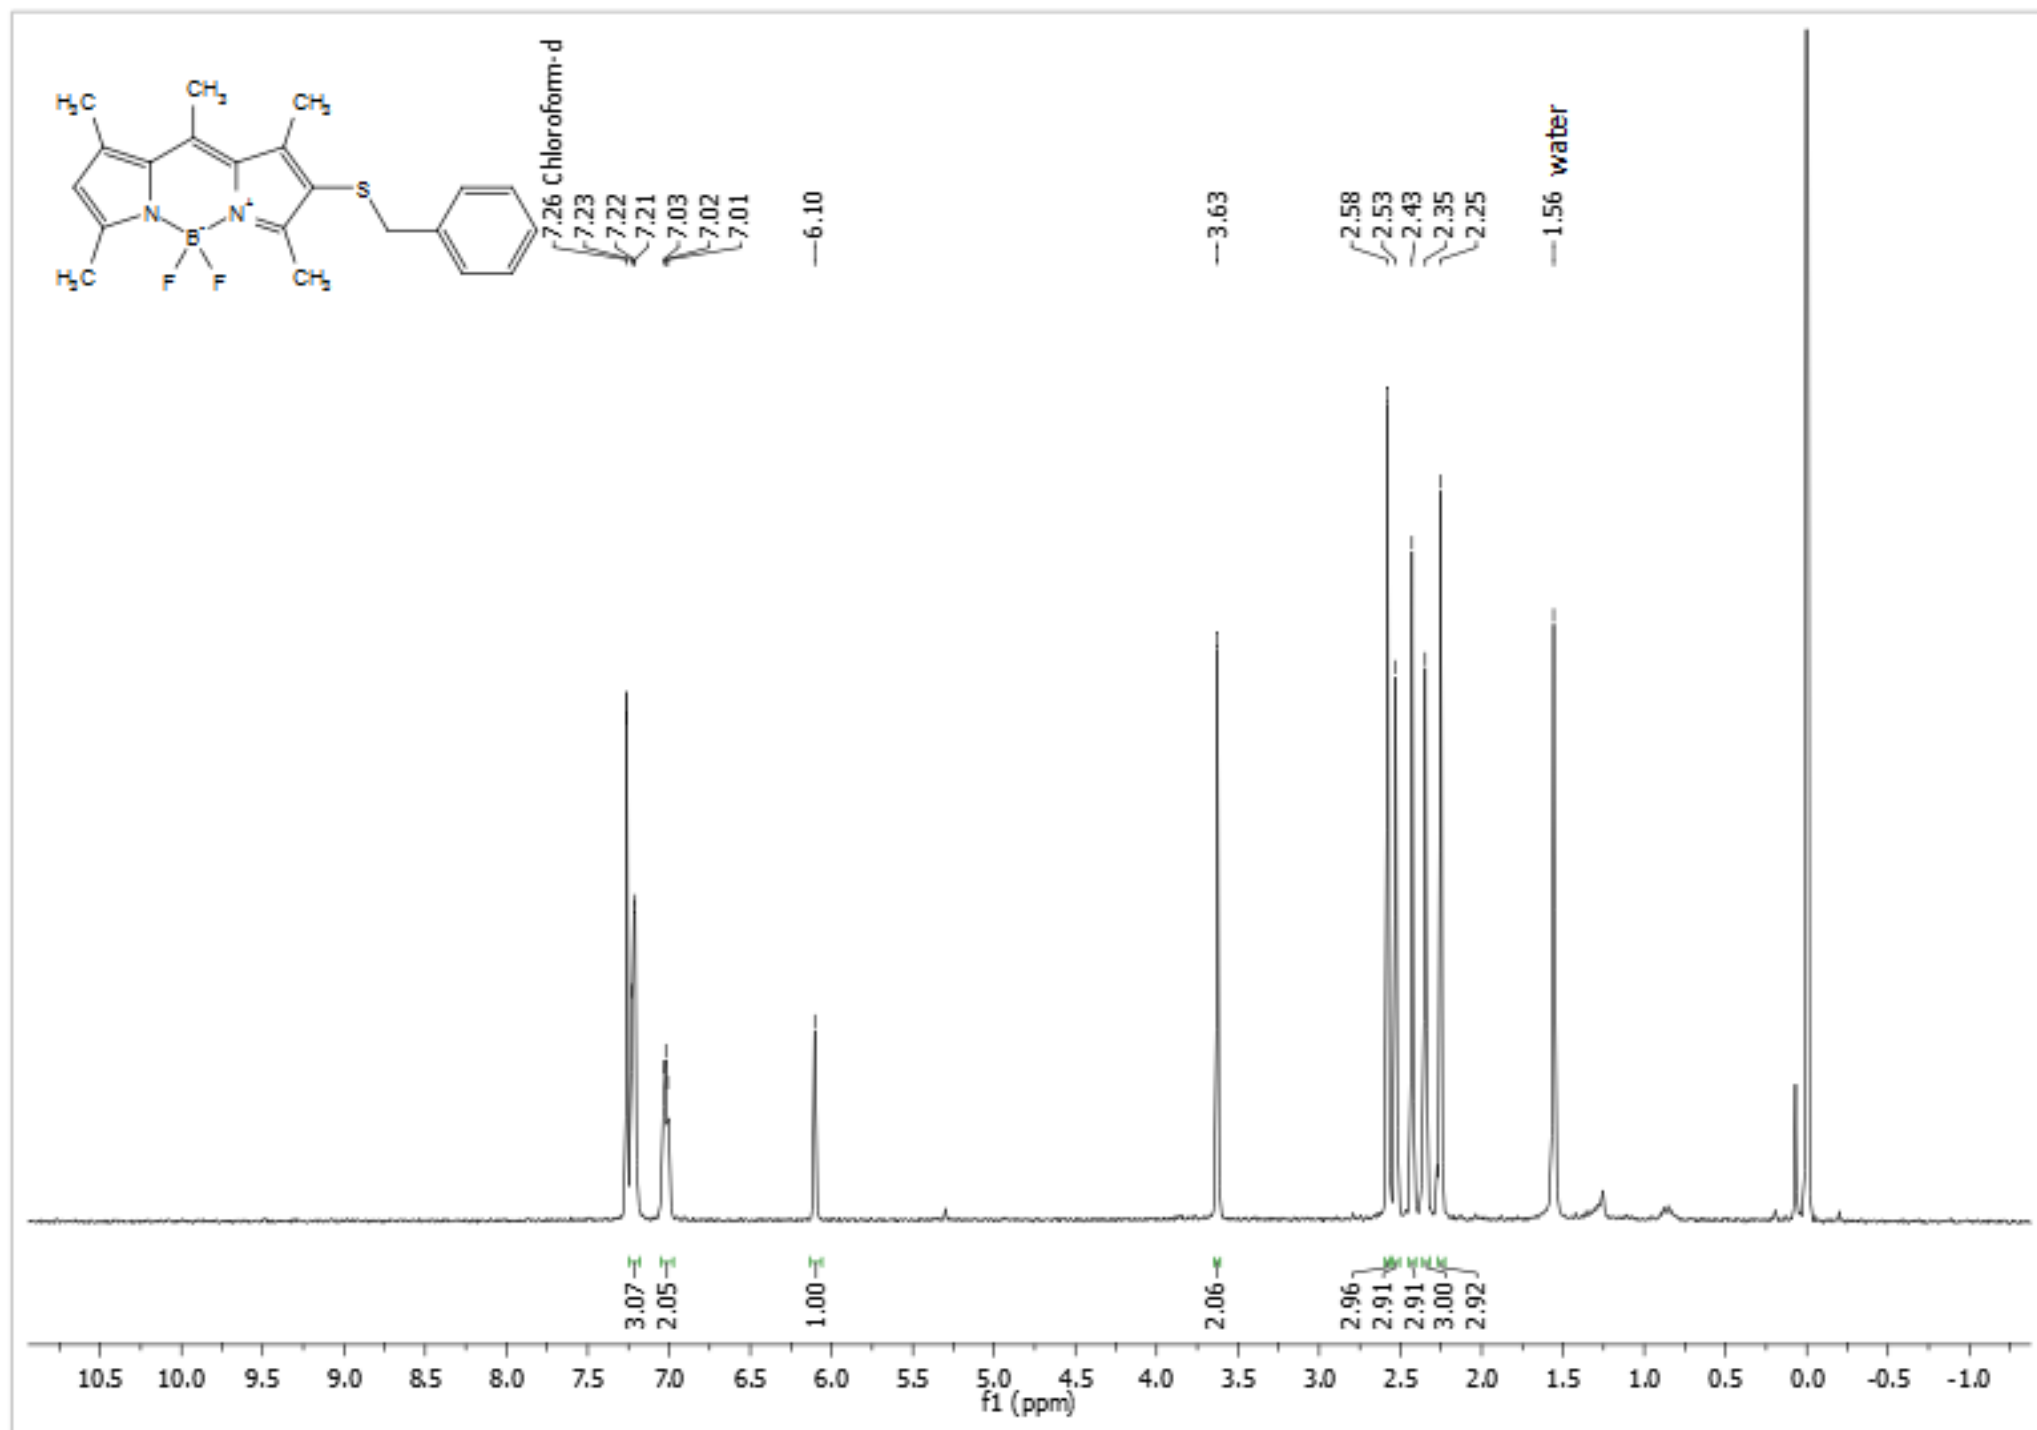

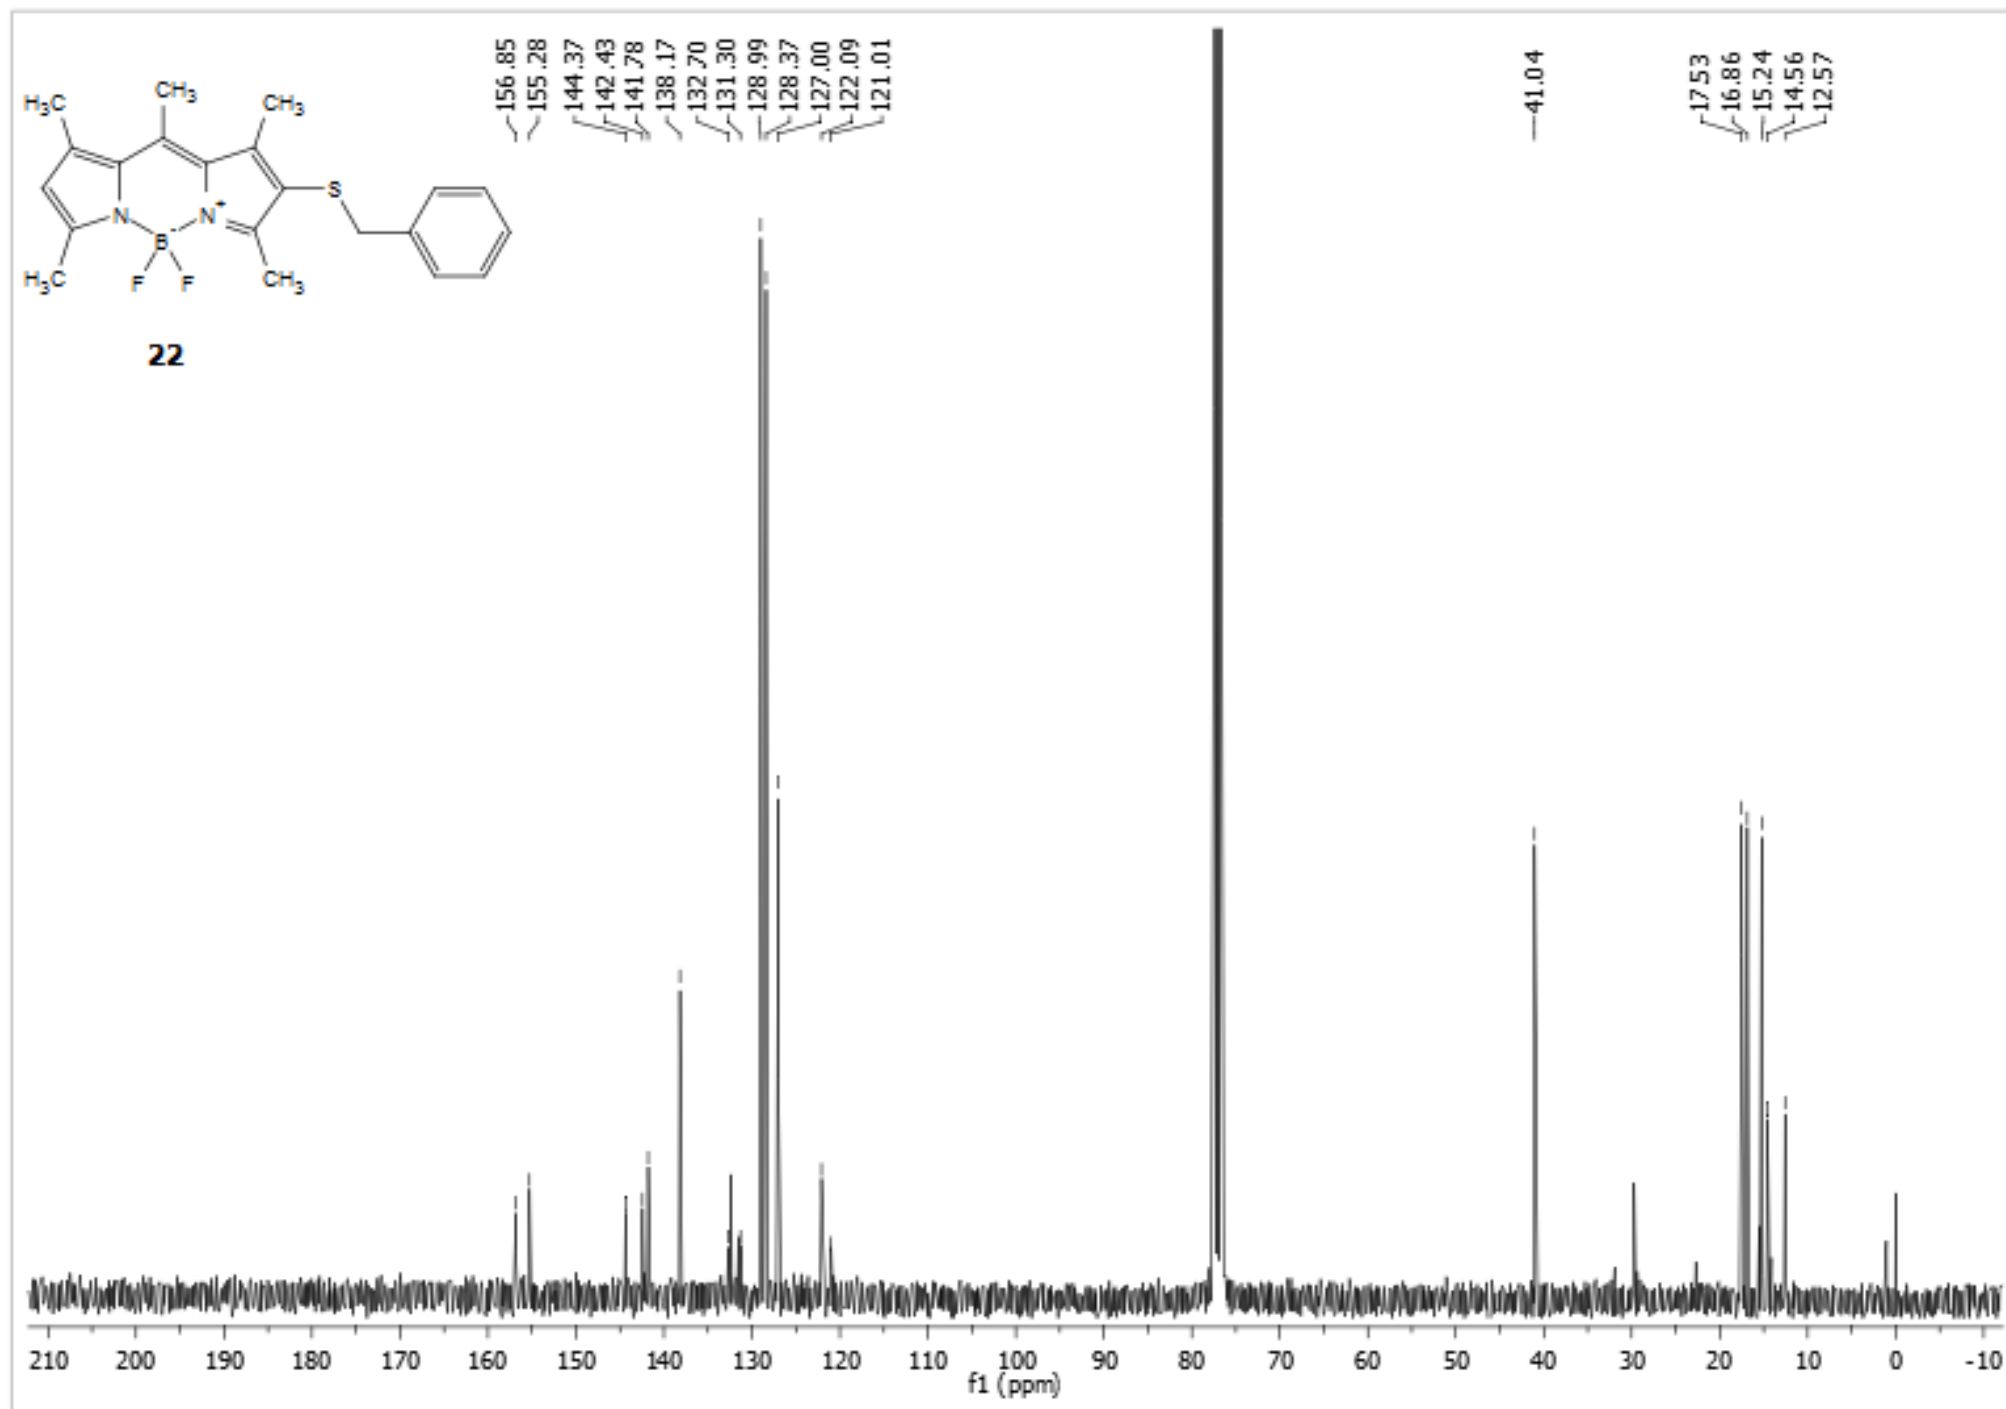



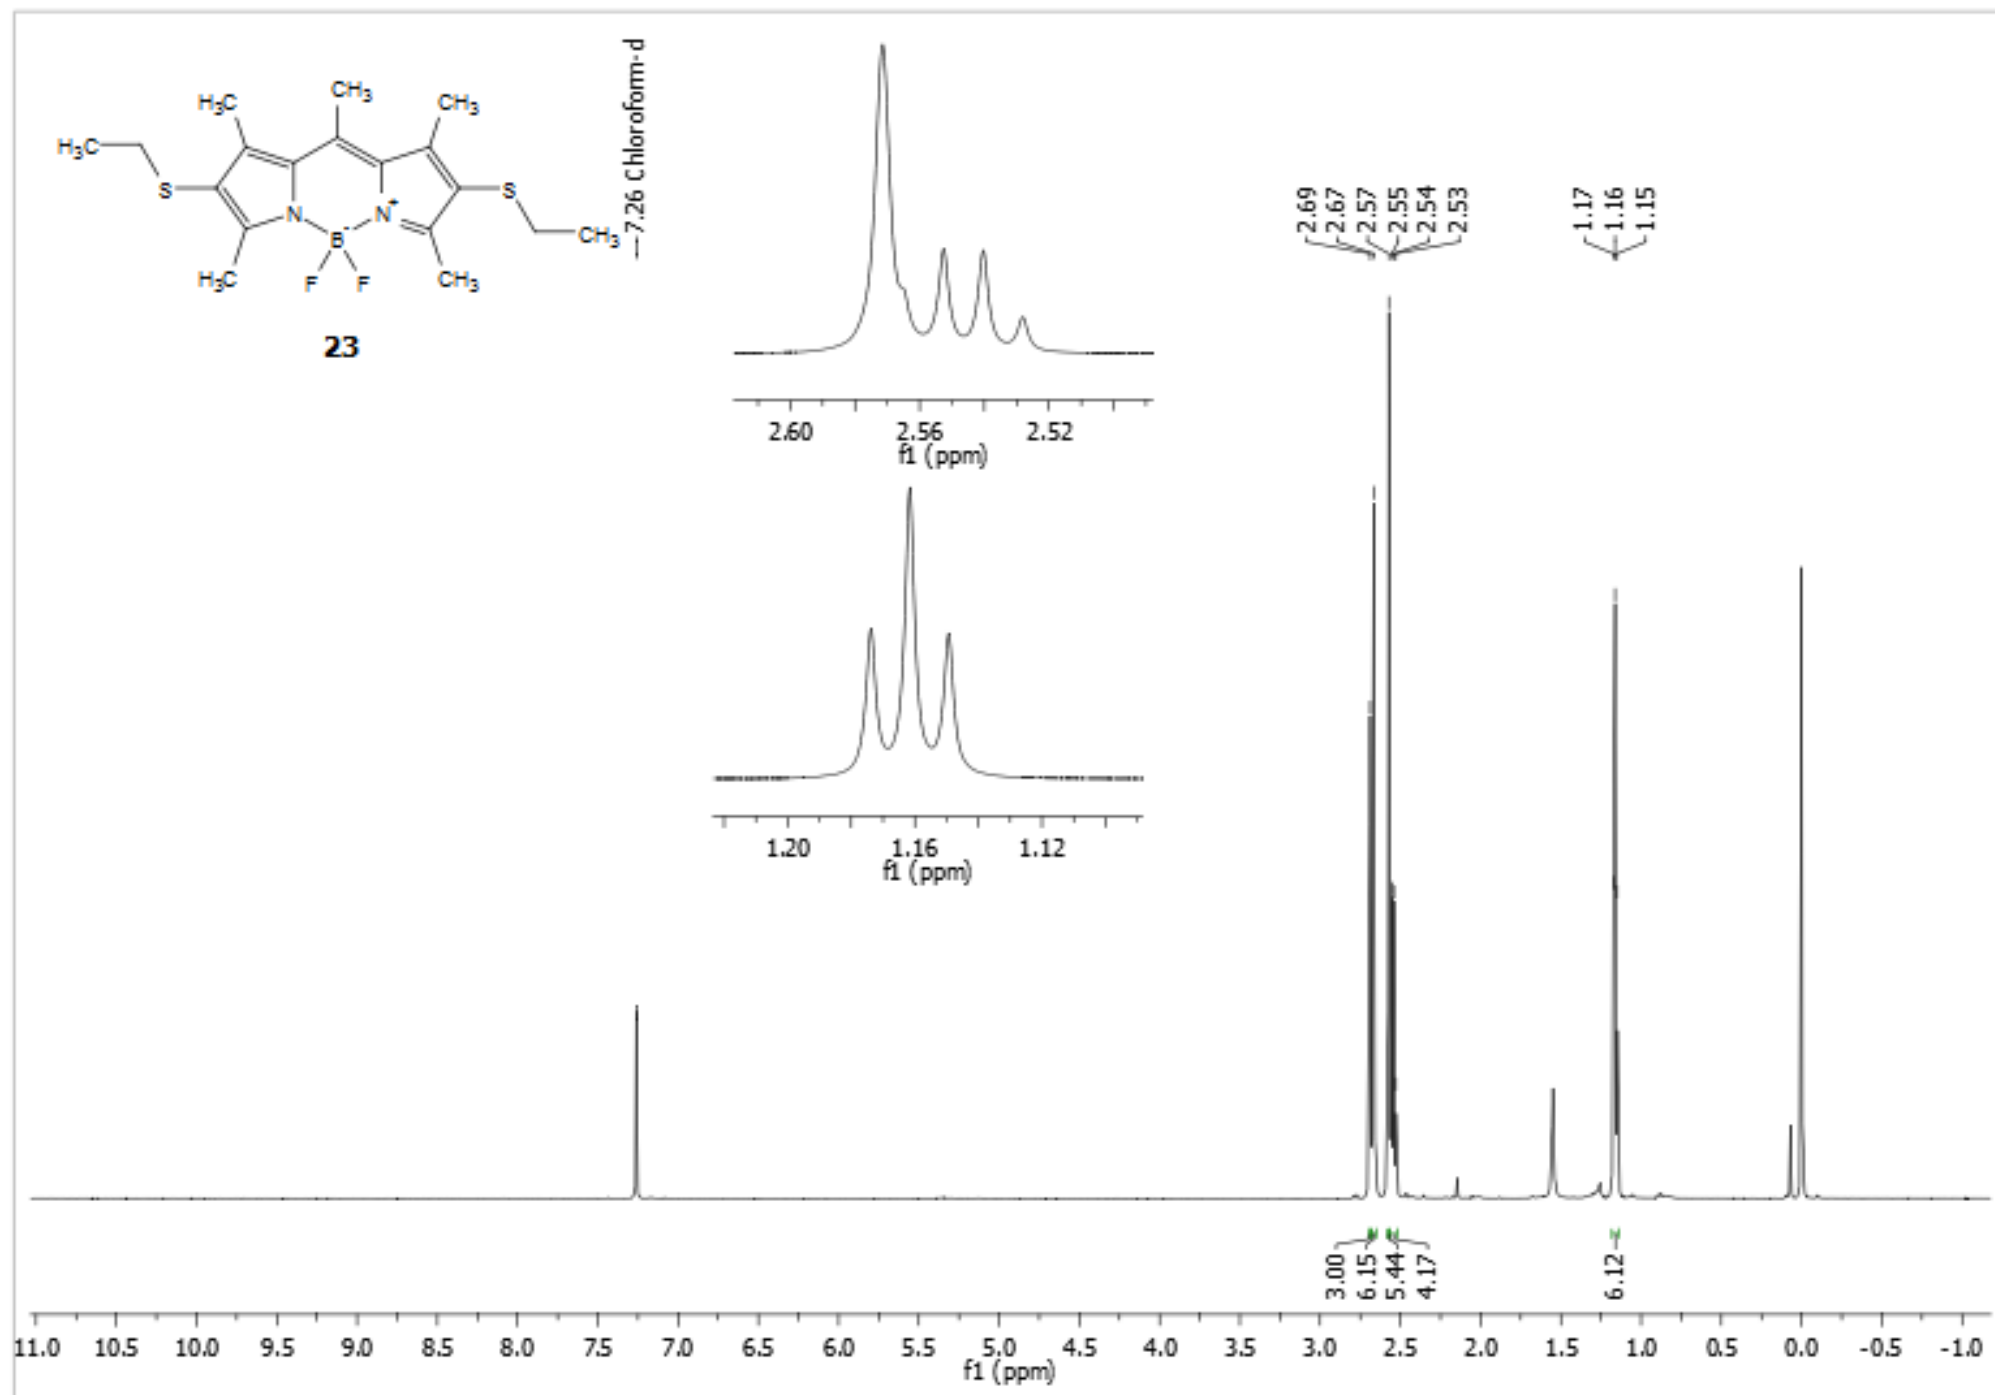

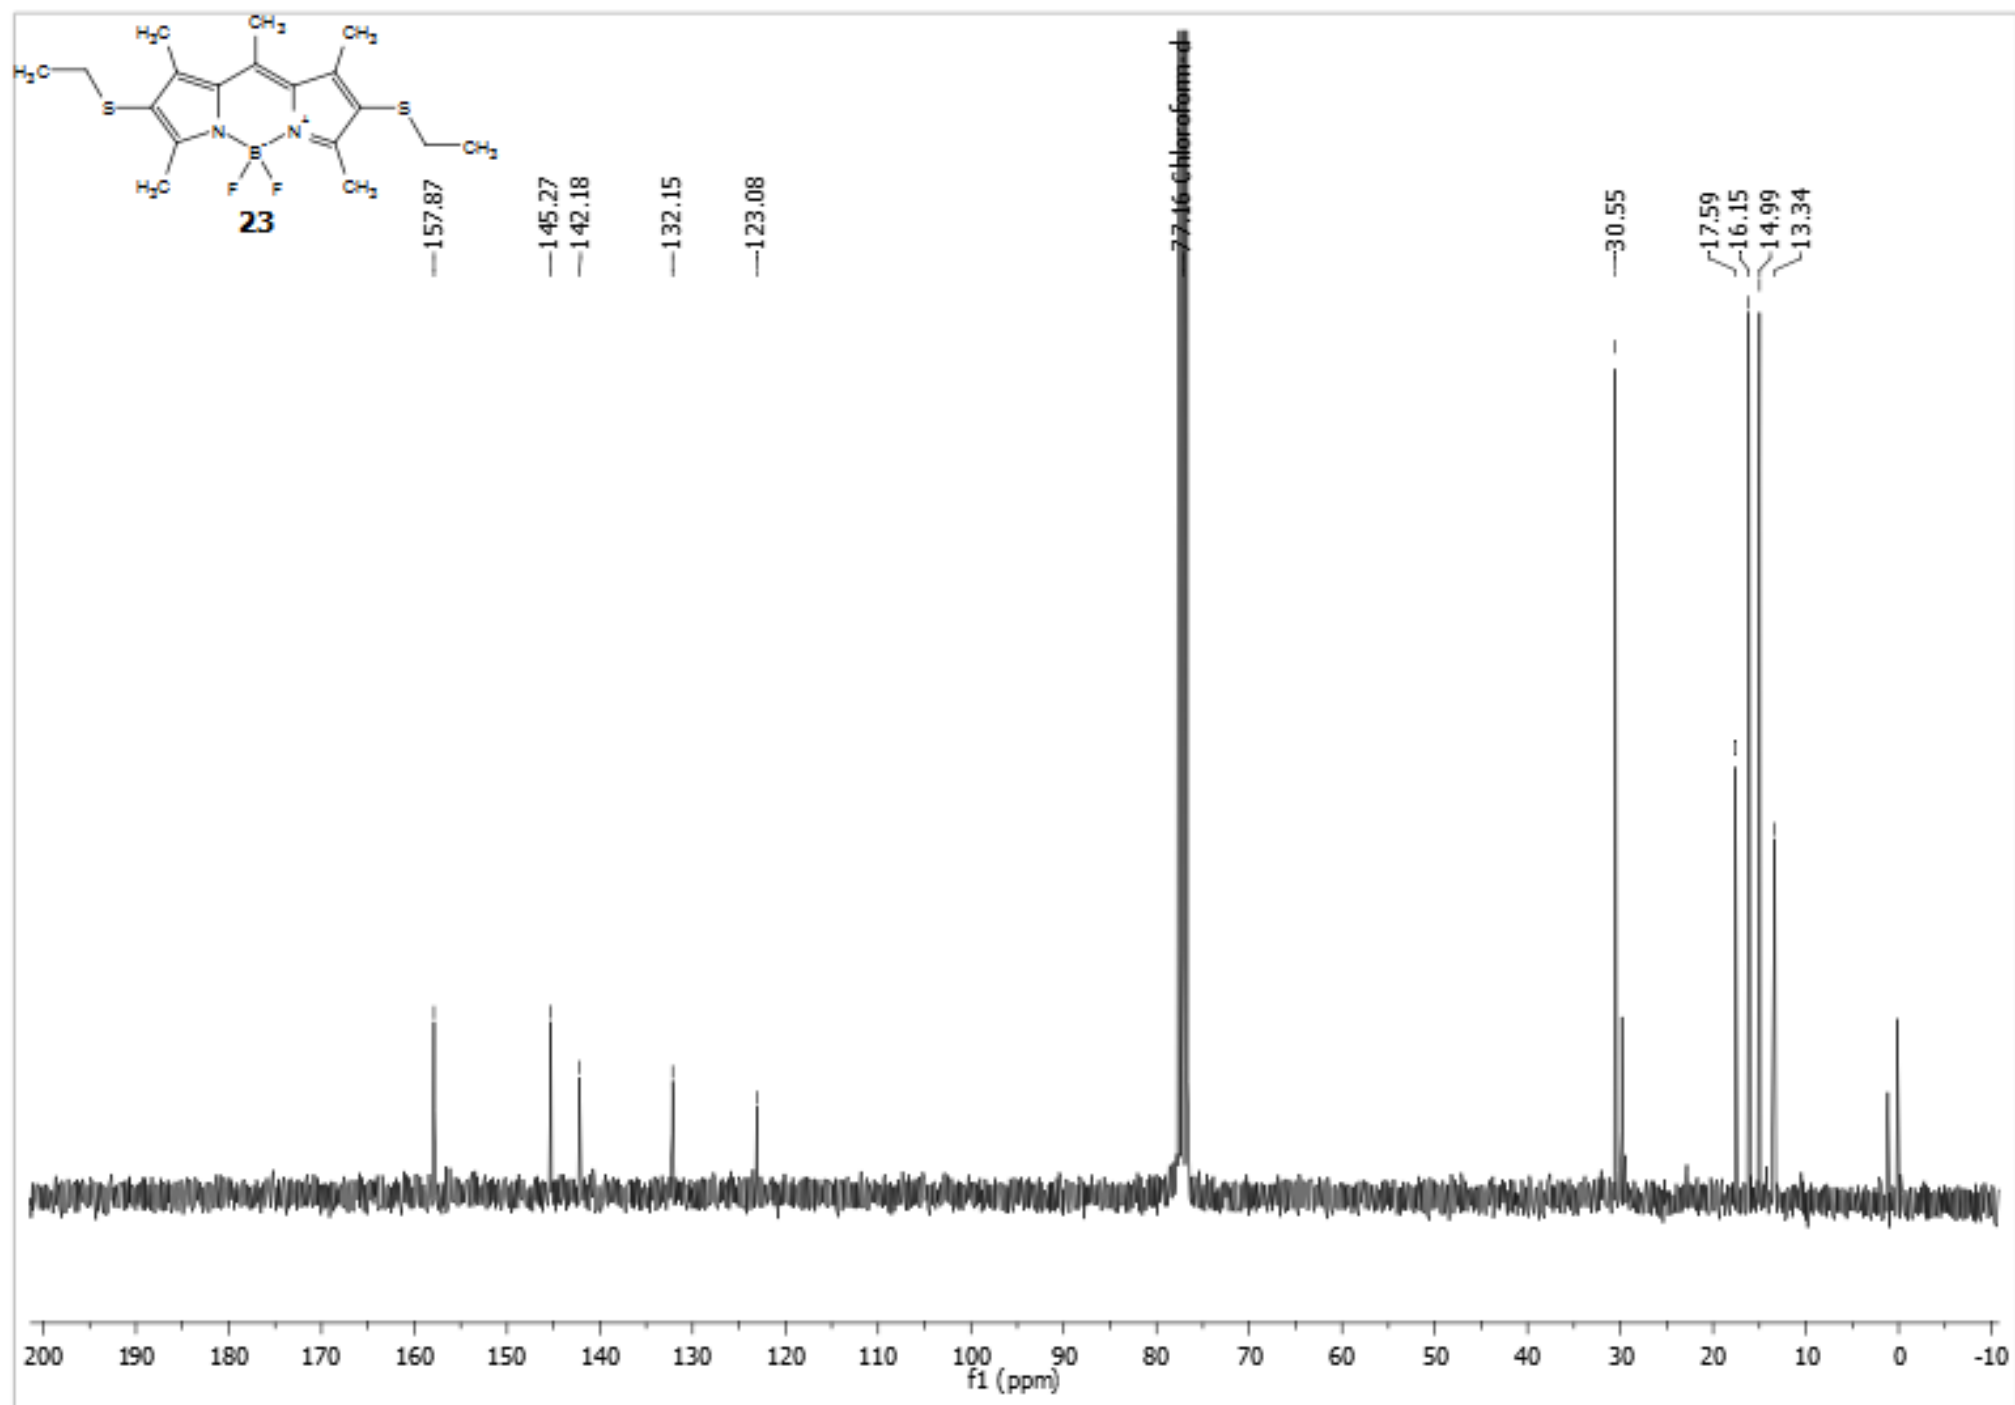

Supplement: c5ob00499c1.pdf [file c5ob00499c1.pdf]
